# Supplementary material for: Design, synthesis and reactivity of dimolybdenum complex bearing quaterphenylene-bridged pyridine-based PNP-type pincer ligand
Source: Royal Society of Chemistry journal article supplement (doi:10.1039/d3dt02887a), 2023-01-01
Supplement: d3dt02887a1.pdf [file d3dt02887a1.pdf]

# Design, synthesis and reactivity of dimolybdenum complex bearing quaterphenylene-bridged pyridine-based PNP-type pincer ligand

Aya Eizawa,<sup>1</sup> Kazuya Arashiba,<sup>1</sup> Hiromasa Tanaka,<sup>2</sup> Asuka Konomi,<sup>3</sup> Kazunari Yoshizawa,\*<sup>3</sup>  
Yoshiaki Nishibayashi\*<sup>1</sup>

<sup>1</sup> Department of Systems Innovation, School of Engineering, The University of Tokyo, Bunkyo-ku, Tokyo 113-8656, Japan

<sup>2</sup> Daido University, Takiharu-cho, Minami-ku, Nagoya, 457-8530, Japan

<sup>3</sup> Institute for Materials Chemistry and Engineering, Kyushu University, Nishi-ku, Fukuoka 819-0395, Japan.

## Table of Contents

|                                   |     |
|-----------------------------------|-----|
| 1. General information            | S2  |
| 2. Experimental procedures        | S2  |
| 3. X-ray crystallographic studies | S7  |
| 4. NMR spectra                    | S11 |
| 5. Computational Details          | S18 |
| 6. Supplementary references       | S26 |

## 1. General information.

$^1\text{H}$  NMR (400 MHz),  $^{13}\text{C}\{^1\text{H}\}$  NMR (101 MHz), and  $^{31}\text{P}\{^1\text{H}\}$  NMR (162 MHz) spectra were recorded on a JEOL JNM-ECS 400 spectrometer in suitable solvents, and spectra were referenced to residual solvent ( $^1\text{H}$ ,  $^{13}\text{C}$ ) or external standard ( $^{31}\text{P}\{^1\text{H}\}$ :  $\text{H}_3\text{PO}_4$ ). Magnetic susceptibility was measured in  $\text{CD}_2\text{Cl}_2$  using the Evans method.<sup>S1</sup> Flash column chromatography was carried out on a Yamazen YFLC-AI-580 system. Absorption spectra were recorded on a Shimadzu UV-1850. Evolved dihydrogen was quantified by a gas chromatography using a Shimadzu GC-8A with a TCD detector and a SHINCARBON ST (6 m  $\times$  3 mm). Elemental analyses were performed at Microanalytical Center of The University of Tokyo. Melting points were measured by using a Stanford Research Systems OptiMelt MPA100.

All manipulations were carried out under an atmosphere of nitrogen or argon by using standard Schlenk techniques or glovebox techniques unless otherwise stated. Solvents were dried by general methods and degassed before use. 4-(4,4,5,5-tetramethyl-1,3,2-dioxaborolan-2-yl)-2,6-bis(di-*tert*-butylphosphinothiomethyl)pyridine (PNP(S)-Bpin),<sup>S2</sup>  $[\text{MoX}_3(\text{thf})_3]$  ( $\text{X} = \text{Cl}$ <sup>S3</sup>,  $\text{I}$ <sup>S4</sup>),  $[\text{MoCl}_3(\text{PNP})]$  (**6**, PNP =  $\text{C}_5\text{NH}_3(\text{CH}_2\text{P}^t\text{Bu}_2)_2$ ),<sup>S5</sup>  $[\text{MoCl}_3(\text{Ph-PNP})]$  (**7**, Ph-PNP = 4-Ph- $\text{C}_5\text{NH}_2(\text{CH}_2\text{P}^t\text{Bu}_2)_2$ ),<sup>S2</sup> and  $\text{SmI}_2(\text{thf})_2$ <sup>S6</sup> were prepared according to the literature methods. All the other reagents were commercially available.

## 2. Experimental procedures.

### Synthesis of **2**

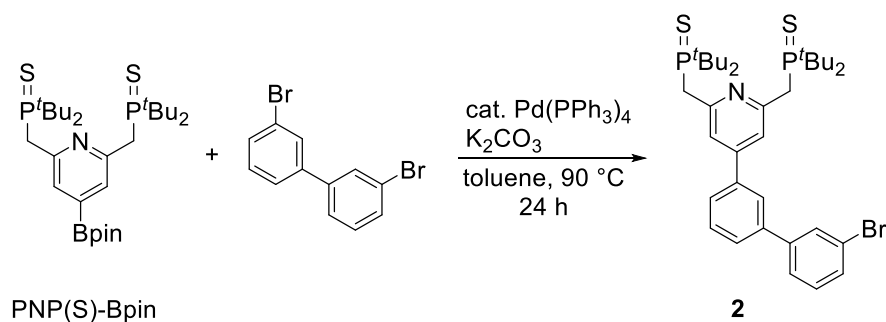

To a mixture of PNP(S)-Bpin (4.23 g, 7.2 mmol), 2,2'-dibromobiphenyl (3.15 g, 10 mmol),  $\text{Pd}(\text{PPh}_3)_4$  (1.17 g, 1.0 mmol), and  $\text{K}_2\text{CO}_3$  (4.98 g, 36 mmol) was added toluene (140 mL), and the suspension was stirred at 90 °C for 24 h. The reaction mixture was cooled to room temperature, and water was added to the reaction mixture. The organic layer was extracted with toluene (20 mL  $\times$  3), and the combined solution was dried with anhydrous  $\text{MgSO}_4$ . The solution was filtered, and volatiles were removed. Purification with column chromatography (hexane/AcOEt = 3/1) and recrystallization from hot EtOH afforded **2** as colorless crystals (2.90 g, 4.2 mmol, 58% yield, mp 181.5-182.5 °C).  $^1\text{H}$  NMR ( $\text{C}_6\text{D}_6$ ):  $\delta$  8.43 (s, 2H, ArH), 8.31 (s, 1H, ArH), 8.01 (dt,  $J = 7.2$  Hz, 1.6

Hz, 1H, *ArH*), 7.75 (t,  $J = 2.0$  Hz, 1H, *ArH*), 7.40 (d,  $J = 8.4$  Hz, 1H, *ArH*), 7.19–7.10 (m, 3H, *ArH*), 6.76 (dt,  $J = 7.6$  Hz, 1.6 Hz, 1H, *ArH*), 3.45 (d,  $^2J_{\text{PH}} = 11.6$  Hz, 4H,  $\text{CH}_2\text{P}$ ), 1.19 (d,  $^3J_{\text{PH}} = 14.4$  Hz, 36H,  $\text{P}^t\text{Bu}_2$ ).  $^{13}\text{C}\{^1\text{H}\}$  NMR (acetone- $d_6$ ):  $\delta$  155.2 (d,  $J = 5.8$  Hz), 146.6, 143.7, 141.0, 140.2, 131.7, 131.4, 130.7, 130.6, 128.4, 127.4, 126.7, 126.5, 123.5, 122.8, 38.9 (d,  $J = 41.7$  Hz), 34.3 (d,  $J = 35.7$  Hz), 28.0.  $^{31}\text{P}\{^1\text{H}\}$  NMR ( $\text{C}_6\text{D}_6$ ):  $\delta$  77.7 (s,  $\text{P}^t\text{Bu}_2$ ). Anal. Calcd for  $\text{C}_{35}\text{H}_{50}\text{BrNP}_2\text{S}_2$ : C, 60.86; H, 7.30; N, 2.03. Found: C, 61.21; H, 7.42; N, 1.82.

### Synthesis of 3

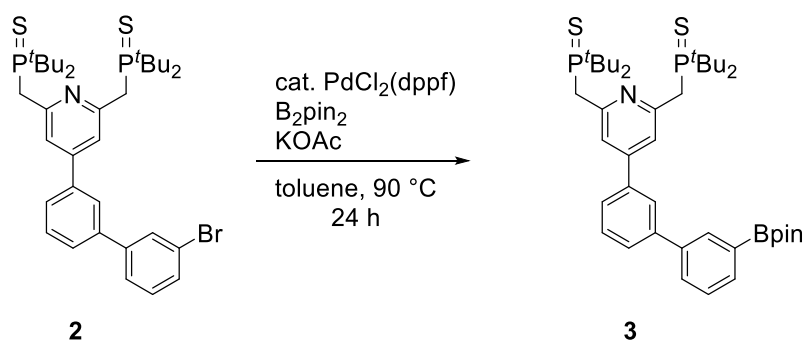

To a mixture of **2** (1046 mg, 1.5 mmol), bis(pinacolato)diboron (387 mg, 1.5 mmol),  $\text{PdCl}_2(\text{dppf})$  (112 mg, 0.15 mmol), and  $\text{KOAc}$  (747 mg, 7.6 mmol) was added toluene (45 mL), and the suspension was stirred at  $90^\circ\text{C}$  for 24 h. The reaction mixture was cooled to room temperature and filtered through Florisil. Volatiles were removed under vacuum to afford orange oil. Hexane (30 mL) was added to the oil, and the mixture was stirred at  $50^\circ\text{C}$  to form beige precipitates. After cooling to room temperature, the resultant suspension was filtered, washed with hexane (5 mL x 2), and dried in vacuo to give **3** as a beige solid (850 mg, 1.2 mmol, 76% yield, mp  $209.5\text{--}210.5^\circ\text{C}$ ).  $^1\text{H}$  NMR ( $\text{C}_6\text{D}_6$ ):  $\delta$  8.55 (s, 1H, *ArH*), 8.45 (s, 1H, *ArH*), 8.40 (s, 2H, *ArH*), 8.07 (d,  $J = 7.2$  Hz, 1H, *ArH*), 7.98 (d,  $J = 8.4$  Hz, 1H, *ArH*), 7.77 (d,  $J = 7.6$  Hz, 1H, *ArH*), 7.43 (d,  $J = 8.4$  Hz, 1H, *ArH*), 7.23 (t,  $J = 7.6$  Hz, 1H, *ArH*), 7.15 (t,  $J = 7.6$  Hz, 1H, *ArH*), 3.43 (d,  $^2J_{\text{P-H}} = 11.2$  Hz, 4H,  $\text{CH}_2\text{P}$ ), 1.20 (d,  $^3J_{\text{PH}} = 14.4$  Hz, 36H,  $\text{P}^t\text{Bu}_2$ ), 1.18 (s, 12H,  $\text{Bpin}$ ).  $^{13}\text{C}\{^1\text{H}\}$  NMR (acetone- $d_6$ ):  $\delta$  155.2 (d,  $J = 5.7$  Hz), 146.8, 142.6, 140.7, 140.1, 134.6, 134.1, 130.63, 130.57, 129.3, 128.3, 126.8, 126.5, 122.8, 84.6, 38.9 (d,  $J = 41.4$  Hz), 34.3 (d,  $J = 35.7$  Hz), 28.0, 25.2, the carbon directly connected to the boron was not detected.  $^{31}\text{P}\{^1\text{H}\}$  NMR ( $\text{C}_6\text{D}_6$ ):  $\delta$  77.6 (s,  $\text{P}^t\text{Bu}_2$ ). Anal. Calcd for  $\text{C}_{41}\text{H}_{62}\text{BNO}_2\text{P}_2\text{S}_2$ : C, 66.74; H, 8.47; N, 1.90. Found: C, 66.49; H, 8.44; N, 2.02.

## Synthesis of 4

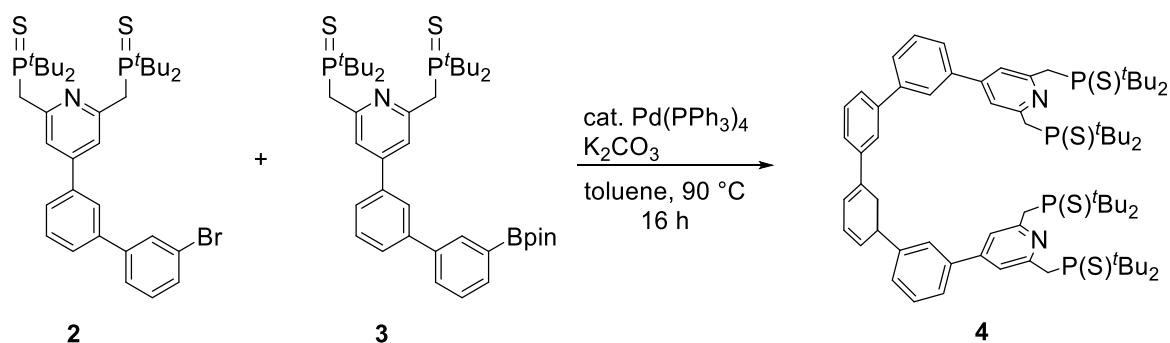

To a mixture of **2** (690 mg, 1.0 mmol), **3** (738 mg, 1.0 mmol), Pd(PPh<sub>3</sub>)<sub>4</sub> (116 mg, 0.10 mmol), and K<sub>2</sub>CO<sub>3</sub> (694 mg, 5.0 mmol) was added toluene (40 mL), and the suspension was stirred at 90 °C for 16 h. The reaction mixture was cooled to room temperature, and water was added to the reaction mixture. The organic layer was extracted with toluene (5 mL x 3), and the combined solution was dried with anhydrous MgSO<sub>4</sub>. The extract was filtered, and volatiles were removed. Purification with column chromatography (hexane/AcOEt = 3/1 to 1/1) gave a colorless oil. EtOH (200 mL) was added to the oil, and the mixture was stirred at 75 °C to form white precipitates. After cooling to room temperature, the resultant suspension was filtered, washed with hexane (5 mL x 3), and dried in vacuo to afford **4** as a white solid (478 mg, 0.39 mmol, 39% yield, mp 277.0-278.0 °C). <sup>1</sup>H NMR (C<sub>6</sub>D<sub>6</sub>): δ 8.59 (s, 2H, ArH), 8.50 (s, 4H, ArH), 8.09 (d, *J* = 7.2 Hz, 2H, ArH), 8.08 (s, 2H, ArH), 7.67 (d, *J* = 7.6 Hz, 2H, ArH), 7.61 (d, *J* = 7.6 Hz, 2H, ArH), 7.55 (d, *J* = 7.6 Hz, 2H, ArH), 7.34 (t, *J* = 7.6 Hz, 2H, ArH), 7.27 (d, *J* = 7.6 Hz, 2H, ArH), 3.46 (d, <sup>2</sup>*J*<sub>PH</sub> = 11.2 Hz, 8H, CH<sub>2</sub>P), 1.20 (d, <sup>3</sup>*J*<sub>PH</sub> = 14.4 Hz, 72H, P<sup>*t*</sup>Bu<sub>2</sub>). <sup>13</sup>C{<sup>1</sup>H} NMR (CD<sub>2</sub>Cl<sub>2</sub>): δ 154.4 (d, *J* = 6.7 Hz), 146.9, 142.04, 141.96, 141.6, 139.3, 129.9, 129.8, 128.1, 126.9, 126.6 (overlapping), 126.5, 126.4, 122.4, 38.6 (d, *J* = 40.5 Hz), 34.3 (d, *J* = 34.7 Hz), 27.9. <sup>31</sup>P{<sup>1</sup>H} NMR (C<sub>6</sub>D<sub>6</sub>): δ 77.7 (s, P<sup>*t*</sup>Bu<sub>2</sub>). Anal. Calcd for C<sub>70</sub>H<sub>100</sub>N<sub>2</sub>P<sub>4</sub>S<sub>4</sub>: C, 68.82; H, 8.25; N, 2.29. Found: C, 68.59; H, 8.38; N, 2.29.

## Synthesis of 5

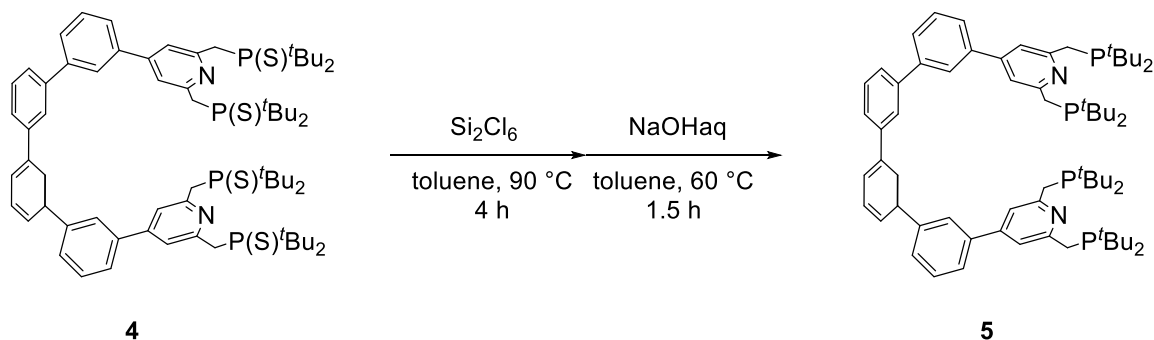

To a solution of **4** (214 mg, 0.17 mmol) in toluene (3 mL) was added Si<sub>2</sub>Cl<sub>6</sub> (0.90 mL, 5.2 mmol), and the mixture was stirred at 90 °C for 4 h. The resultant solution containing red oil was

cooled to 0 °C. Aqueous NaOH solution (10 M, 10.5 mL, 105 mmol) was added dropwise, and the mixture was stirred at 60 °C for 1.5 h. The organic layer was extracted with toluene (2 mL x 3) and dried with anhydrous Na<sub>2</sub>SO<sub>4</sub>. The solution was filtered, and volatiles were removed under vacuum to give colorless oil. The oil was dissolved in benzene (3 mL), and then the solution was lyophilized to afford **5** as a white solid (108 mg, 0.10 mmol, 57% yield). This compound was used as a ligand without further purification. <sup>1</sup>H NMR (C<sub>6</sub>D<sub>6</sub>): δ 8.07 (s, 2H, ArH), 7.87 (s, 2H, ArH), 7.80 (s, 4H, ArH), 7.62 (d, *J* = 7.6 Hz, 2H, ArH), 7.49–7.42 (m, 6H, ArH), 7.23 (t, *J* = 7.6 Hz, 4H, ArH), 3.23 (d, *J* = 2.0 Hz, 8H, CH<sub>2</sub>P), 1.16 (d, <sup>3</sup>*J*<sub>PH</sub> = 10.4 Hz, 72H, P<sup>*t*</sup>Bu<sub>2</sub>). <sup>31</sup>P{<sup>1</sup>H} NMR (C<sub>6</sub>D<sub>6</sub>): δ 35.7 (s, P<sup>*t*</sup>Bu<sub>2</sub>).

### Synthesis of **1**.

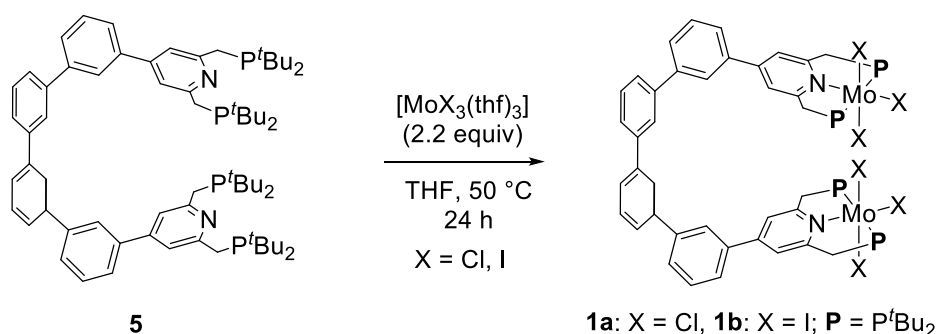

A typical procedure for the synthesis of **1a** is described below. A mixture of **5** (35 mg, 0.032 mmol) and [MoCl<sub>3</sub>(thf)<sub>3</sub>] (30 mg, 0.071 mmol) in THF (3 mL) was stirred at 50 °C for 24 h. The solution was removed under vacuum, and the residue was washed with hexane (2 mL x 3). The resultant solid was extracted with THF (3 mL), and slow addition of benzene (3 mL) and hexane (15 mL) to the extract afforded **1a** as a red crystalline solid (29 mg, 0.019 mmol, 60% yield). Magnetic susceptibility (Evans method):  $\mu_{\text{eff}} = 3.44\mu_{\text{B}}$  in CD<sub>2</sub>Cl<sub>2</sub> at 293 K. Analytical sample was obtained by recrystallization from THF-benzene-Et<sub>2</sub>O. Anal. calcd for C<sub>70</sub>H<sub>100</sub>Cl<sub>6</sub>Mo<sub>2</sub>N<sub>2</sub>P<sub>4</sub>: C, 56.12; H, 6.73; N, 1.87. Found: C, 56.24; H, 6.70; N, 1.94.

**8b**: Recrystallization from THF-hexane gave **1b**·2C<sub>6</sub>H<sub>14</sub> as orange-brown crystals suitable for X-ray analysis. The crystals were filtered and dried in vacuo to afford **1b**·C<sub>6</sub>H<sub>14</sub> as a brown solid (60% yield). Magnetic susceptibility (Evans method):  $\mu_{\text{eff}} = 3.43\mu_{\text{B}}$  in CD<sub>2</sub>Cl<sub>2</sub> at 293 K. Anal. calcd for C<sub>76</sub>H<sub>114</sub>I<sub>6</sub>Mo<sub>2</sub>N<sub>2</sub>P<sub>4</sub>: C, 42.80; H, 5.39; N, 1.31. Found: C, 43.32; H, 5.46; N, 1.32.

### Catalytic reduction of dinitrogen to ammonia under N<sub>2</sub> atmosphere

A typical experimental procedure for the catalytic reduction of dinitrogen into ammonia using **1a** is described below. In a nitrogen-filled glove box, to a mixture of **1a** (1.5 mg, 0.0010 mmol (0.0020 mmol/Mo)) and SmI<sub>2</sub>(thf)<sub>2</sub> (197.5 mg, 0.36 mmol) placed in a 50 ml Schlenk flask was added THF

(5.5 ml). The Schlenk flask was brought outside the glovebox, and THF (500  $\mu$ l) containing H<sub>2</sub>O (0.36 mmol) was added to the solution under N<sub>2</sub> (1 atm). The mixture was stirred at 25 °C for 18 h. After the reaction, the amount of dihydrogen obtained was determined by GC analysis (0.0088 mmol, 4 equiv/Mo). Aqueous solution of potassium hydroxide (30 wt%; 5 mL) was added to the reaction mixture, and the mixture was distilled into the dilute H<sub>2</sub>SO<sub>4</sub> solution (0.5 M, 10 mL). The amount of NH<sub>3</sub> present in the H<sub>2</sub>SO<sub>4</sub> solutions was determined by the indophenol method.<sup>S7</sup> The amount of ammonia was 0.112 mmol (56 equiv/Mo). The results of catalytic reaction are shown in Table S1.

**Table S1.** Catalytic reaction for ammonia production.

$$\text{N}_2 + 6 \text{Sml}_2(\text{thf})_2 + 6 \text{H}_2\text{O} \xrightarrow[\text{THF, 25 }^\circ\text{C, 18 h}]{\text{Catalyst}} 2 \text{NH}_3 (+ \text{H}_2)$$

(1 atm)            (0.36 mmol)            (0.36 mmol)

| Catalyst  | Cat load.<br>( $\mu$ mol/Mo) | NH <sub>3</sub><br>(mmol) | NH <sub>3</sub><br>(equiv/Mo) | NH <sub>3</sub> yield <sup>a</sup><br>(%) | H <sub>2</sub><br>(mmol) | H <sub>2</sub><br>(equiv/Mo) | H <sub>2</sub> yield <sup>a</sup><br>(%) |
|-----------|------------------------------|---------------------------|-------------------------------|-------------------------------------------|--------------------------|------------------------------|------------------------------------------|
| <b>1a</b> | 2.0                          | 0.108                     | 54                            | 90                                        | 0.016                    | 8                            | 9                                        |
| <b>1a</b> | 2.0                          | 0.103                     | 52                            | 86                                        | 0.018                    | 9                            | 10                                       |
| <b>1a</b> | 2.0                          | 0.112                     | 56                            | 93                                        | 0.0088                   | 4                            | 5                                        |
|           |                              | average                   | 54 $\pm$ 2                    | 90 $\pm$ 4                                | average                  | 7 $\pm$ 2                    | 8 $\pm$ 3                                |
| <b>1b</b> | 2.0                          | 0.050                     | 25                            | 42                                        | 0.092                    | 46                           | 51                                       |
| <b>1a</b> | 0.20                         | 0.100                     | 500                           | 83                                        | 0.018                    | 90                           | 10                                       |
| <b>1a</b> | 0.10                         | 0.088                     | 880                           | 73                                        | 0.051                    | 510                          | 28                                       |
| <b>1a</b> | 0.10                         | 0.078                     | 780                           | 65                                        | 0.049                    | 490                          | 27                                       |
|           |                              | average                   | 830 $\pm$ 70                  | 69 $\pm$ 6                                | average                  | 500 $\pm$ 10                 | 28 $\pm$ 1                               |
| <b>1a</b> | 0.050                        | 0.0835                    | 1670                          | 70                                        | 0.043                    | 860                          | 24                                       |
| <b>1a</b> | 0.050                        | 0.0840                    | 1680                          | 70                                        | 0.041                    | 820                          | 23                                       |
| <b>1a</b> | 0.050                        | 0.0810                    | 1620                          | 68                                        | 0.045                    | 900                          | 25                                       |
|           |                              | average                   | 1660 $\pm$ 30                 | 69 $\pm$ 1                                | average                  | 860 $\pm$ 40                 | 24 $\pm$ 1                               |
| <b>6</b>  | 0.050                        | 0.033                     | 660                           | 28                                        | 0.039                    | 780                          | 22                                       |
| <b>6</b>  | 0.050                        | 0.037                     | 740                           | 31                                        | 0.031                    | 620                          | 17                                       |
| <b>6</b>  | 0.050                        | 0.035                     | 700                           | 30                                        | 0.029                    | 580                          | 16                                       |
|           |                              | average                   | 700 $\pm$ 40                  | 29 $\pm$ 2                                | average                  | 660 $\pm$ 110                | 18 $\pm$ 3                               |
| <b>7</b>  | 0.050                        | 0.0895                    | 1790                          | 75                                        | 0.036                    | 720                          | 20                                       |
| <b>7</b>  | 0.050                        | 0.0944                    | 1890                          | 79                                        | 0.029                    | 580                          | 16                                       |
|           |                              | average                   | 1840 $\pm$ 70                 | 77 $\pm$ 3                                | average                  | 650 $\pm$ 100                | 18 $\pm$ 3                               |

<sup>a</sup>Yield based on Sml<sub>2</sub>(thf)<sub>2</sub>.

### 3. X-ray crystallographic studies.

Crystallographic data of **1a**·2C<sub>6</sub>H<sub>6</sub> and **1b**·2C<sub>6</sub>H<sub>14</sub> is summarized in Table S2. The ORTEP drawing and selected bond lengths and angles are shown in Figures S1-2 and Tables S3-S4, respectively. Diffraction data were collected for the  $2\theta$  range of 4° to 63° at –180 °C on a Rigaku XtaLAB Synergy HPC diffractometer with graphite-monochromated Mo K $\alpha$  radiation ( $\lambda = 0.71075$  Å), with VariMax optics. Intensity data were corrected for Lorenz-polarization effects and for empirical absorption (ABSCOR). The structure solution and refinements were carried out by using the *CrystalStructure* crystallographic software package.<sup>S8</sup> The positions of the non-hydrogen atoms were determined by direct methods (SIR 2011<sup>S9</sup> for **1a**, SHELXS<sup>S10</sup> for **1b**) and subsequent Fourier syntheses (SHELXL 2016/9<sup>S11</sup>) and were refined on  $F_o^2$  using all unique reflections by full-matrix least-squares with anisotropic thermal parameters. All the hydrogen atoms were placed at the calculated positions with fixed isotropic parameters.

The unit cell of **1a** or **1b** contains solvent accessible voids of 2046 Å<sup>3</sup> or 1617 Å<sup>3</sup>, respectively. The electron density associated with some solvent molecules was removed by the SQUEEZE routine of PLATON<sup>S12</sup> for crystal data of **1a** and **1b**.

**Table S2.** X-ray crystallographic data for **1a** and **1b**.

|                                                               | <b>1a</b> ·2C <sub>6</sub> H <sub>6</sub>                                                      | <b>1b</b> ·2C <sub>6</sub> H <sub>14</sub>                                                    |
|---------------------------------------------------------------|------------------------------------------------------------------------------------------------|-----------------------------------------------------------------------------------------------|
| CCDC number                                                   | 2279663                                                                                        | 2279664                                                                                       |
| chemical formula                                              | C <sub>82</sub> H <sub>112</sub> Cl <sub>6</sub> Mo <sub>2</sub> N <sub>2</sub> P <sub>4</sub> | C <sub>82</sub> H <sub>128</sub> I <sub>6</sub> Mo <sub>2</sub> N <sub>2</sub> P <sub>4</sub> |
| formula weight                                                | 1654.29                                                                                        | 2219.13                                                                                       |
| dimensions of crystals                                        | 0.098 × 0.074 × 0.040                                                                          | 0.209 × 0.087 × 0.057                                                                         |
| crystal color, habit                                          | orange, plate                                                                                  | orange, needle                                                                                |
| crystal system                                                | monoclinic                                                                                     | monoclinic                                                                                    |
| space group                                                   | <i>I</i> 2/a                                                                                   | <i>I</i> 2/a                                                                                  |
| <i>a</i> , Å                                                  | 17.0001(3)                                                                                     | 17.9320(4)                                                                                    |
| <i>b</i> , Å                                                  | 19.0388(3)                                                                                     | 19.0778(4)                                                                                    |
| <i>c</i> , Å                                                  | 30.0601(5)                                                                                     | 30.6795(8)                                                                                    |
| $\alpha$ , deg                                                | 90                                                                                             | 90                                                                                            |
| $\beta$ , deg                                                 | 103.092(2)                                                                                     | 105.233(2)                                                                                    |
| $\gamma$ , deg                                                | 90                                                                                             | 90                                                                                            |
| <i>V</i> , Å <sup>3</sup>                                     | 9476.4(4)                                                                                      | 10126.8(4)                                                                                    |
| <i>Z</i>                                                      | 4                                                                                              | 4                                                                                             |
| $\rho_{\text{calcd}}$ , g cm <sup>-3</sup>                    | 1.159                                                                                          | 1.455                                                                                         |
| <i>F</i> (000)                                                | 3456.00                                                                                        | 4384.00                                                                                       |
| $\mu$ , cm <sup>-1</sup>                                      | 5.378                                                                                          | 21.760                                                                                        |
| trans. factors range                                          | 0.778-0.979                                                                                    | 0.103-0.883                                                                                   |
| no. reflections measured                                      | 40947                                                                                          | 49727                                                                                         |
| no. unique reflections                                        | 11772 ( <i>R</i> <sub>int</sub> = 0.0414)                                                      | 13312 ( <i>R</i> <sub>int</sub> = 0.0870)                                                     |
| no. parameters refined                                        | 433                                                                                            | 433                                                                                           |
| <i>R</i> 1 ( <i>I</i> > 2 $\sigma$ ( <i>I</i> )) <sup>a</sup> | 0.0405                                                                                         | 0.0683                                                                                        |
| <i>wR</i> 2 (all data) <sup>b</sup>                           | 0.1139                                                                                         | 0.1911                                                                                        |
| GOF (all data) <sup>c</sup>                                   | 1.037                                                                                          | 1.003                                                                                         |
| max diff peak / hole, e Å <sup>-3</sup>                       | 0.80/-0.42                                                                                     | 2.37/-1.04                                                                                    |

<sup>a</sup> $R1 = \frac{\sum ||F_o| - |F_c||}{\sum |F_o|}$ . <sup>b</sup> $wR2 = [\frac{\sum w(F_o^2 - F_c^2)^2}{\sum w(F_o^2)^2}]^{1/2}$ ,  $w = 1/[\sigma^2(F_o^2) + (qP)^2 + rP]$ ,  $P = (\text{Max}(F_o^2, 0) + 2 F_c^2)/3$  [ $q = 0.0713$  (**1a**), 0.1009 (**1b**);  $r = 3.5220$  (**1a**), 0 (**1b**)]. <sup>c</sup>GOF =  $[\frac{\sum w(F_o^2 - F_c^2)^2}{(N_o - N_{\text{params}})}]^{1/2}$ .



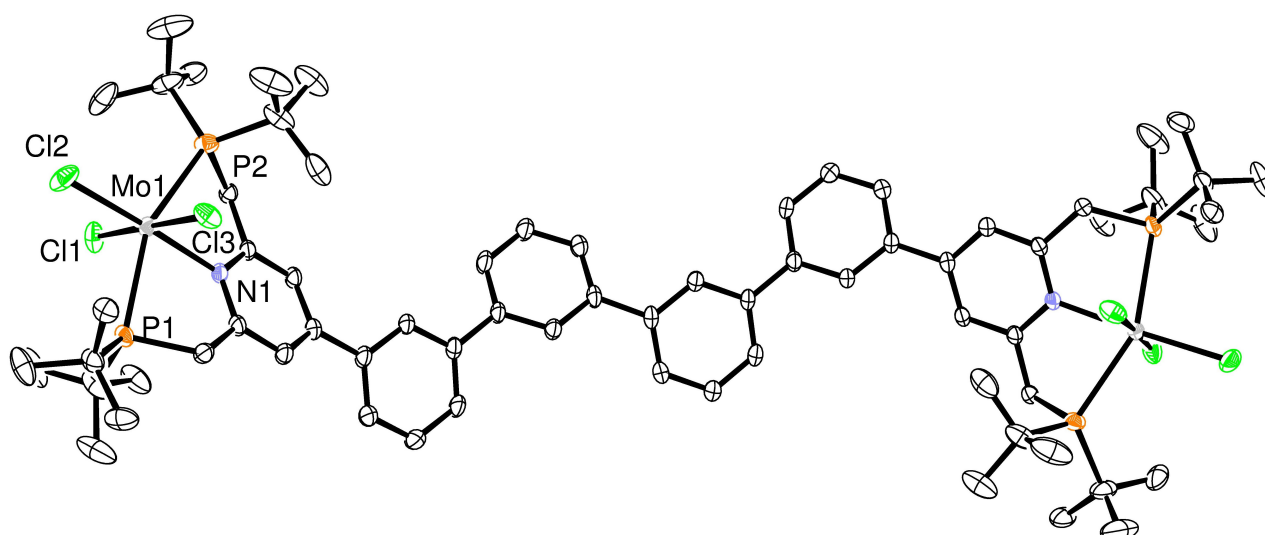

**Figure S1.** ORTEP drawing of **1a**. Thermal ellipsoids are shown at the 50% probability level. All hydrogen atoms are omitted for clarity.

**Table S3.** Selected bond lengths and angles of **1a**.

| Bond lengths (Å) |            | Bond angles (deg) |           |
|------------------|------------|-------------------|-----------|
| Mo1–Cl1          | 2.4269(7)  | Cl1–Mo1–Cl3       | 176.86(3) |
| Mo1–Cl2          | 2.4044(7)  | Cl2–Mo1–N1        | 177.33(6) |
| Mo1–Cl3          | 2.4253(7)  | P1–Mo1–P2         | 154.22(2) |
| Mo1–P1           | 2.6033(8)  |                   |           |
| Mo1–P2           | 2.6225(9)  |                   |           |
| Mo1–N1           | 2.1872(16) |                   |           |

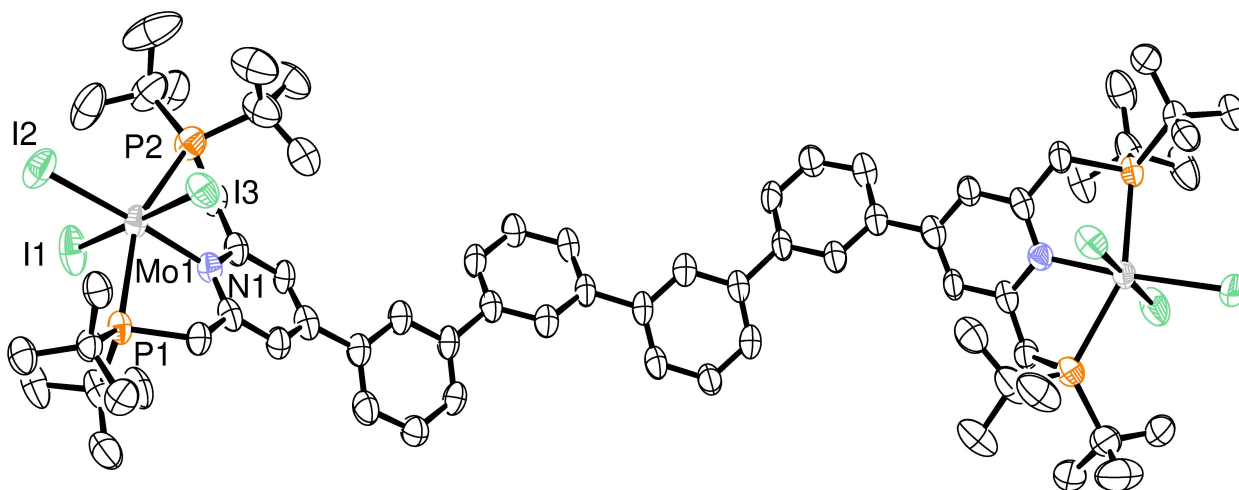

**Figure S2.** ORTEP drawing of **1b**. Thermal ellipsoids are shown at the 50% probability level. All hydrogen atoms are omitted for clarity.

**Table S4.** Selected bond lengths and angles of **1b**.

| Bond lengths (Å) |            | Bond angles (deg) |            |
|------------------|------------|-------------------|------------|
| Mo1–I1           | 2.7740(8)  | I1–Mo1–I3         | 179.26(3)  |
| Mo1–I2           | 2.7498(7)  | I2–Mo1–N1         | 176.12(13) |
| Mo1–I3           | 2.7834(7)  | P1–Mo1–P2         | 153.77(5)  |
| Mo1–P1           | 2.6329(18) |                   |            |
| Mo1–P2           | 2.683(2)   |                   |            |
| Mo1–N1           | 2.180(4)   |                   |            |

#### 4. NMR spectra.

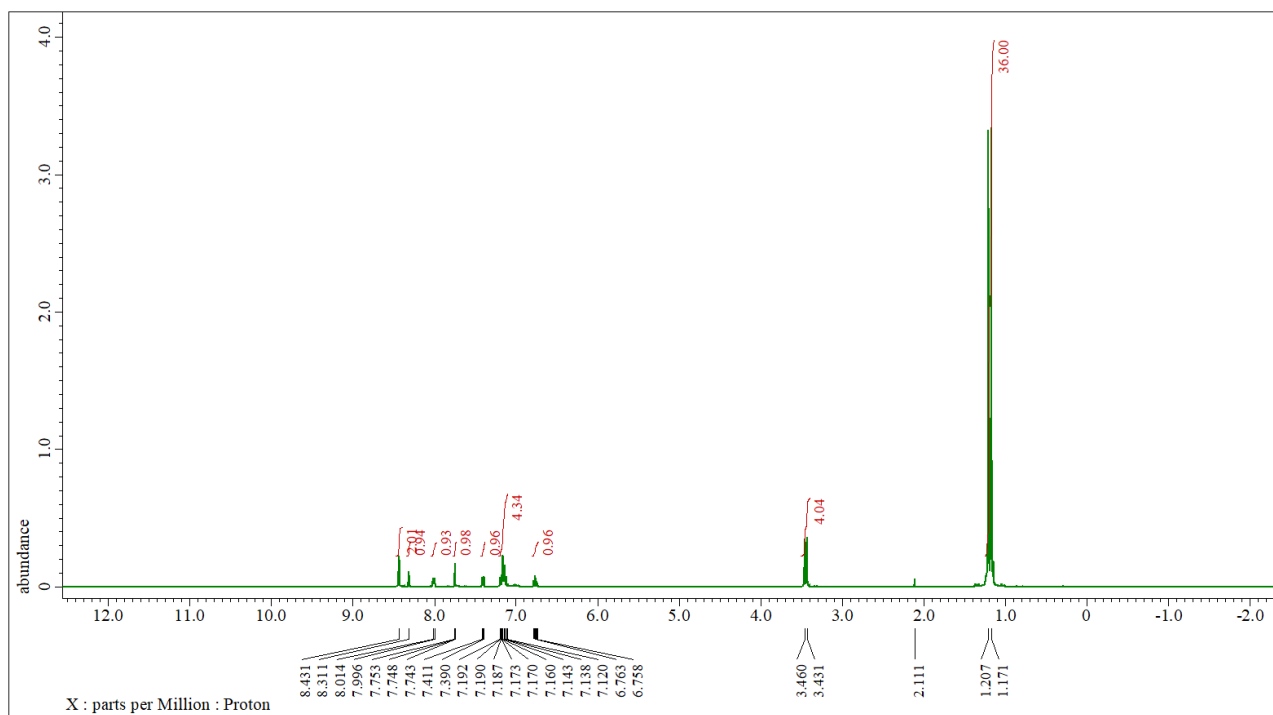

Figure S3.  $^1\text{H}$  NMR spectrum of 2.

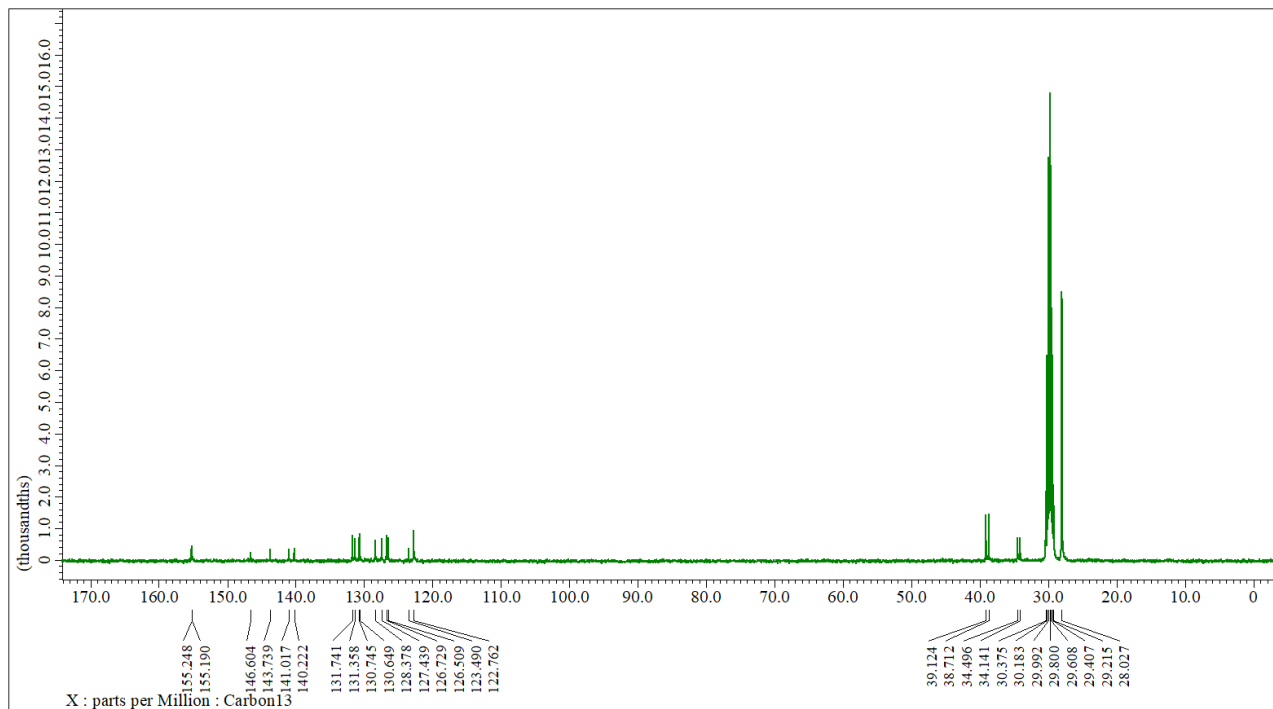

Figure S4.  $^{13}\text{C}\{^1\text{H}\}$  NMR spectrum of 2.

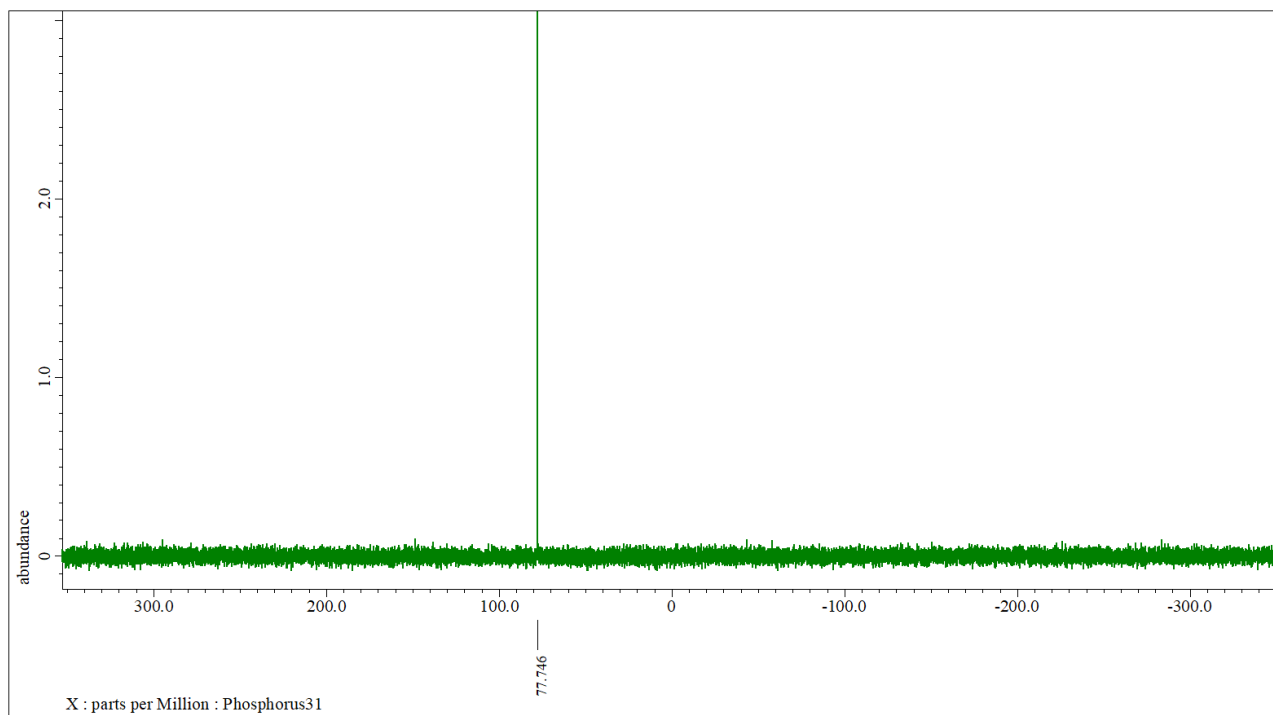

**Figure S5.**  $^{31}\text{P}\{^1\text{H}\}$  NMR spectrum of **2**.

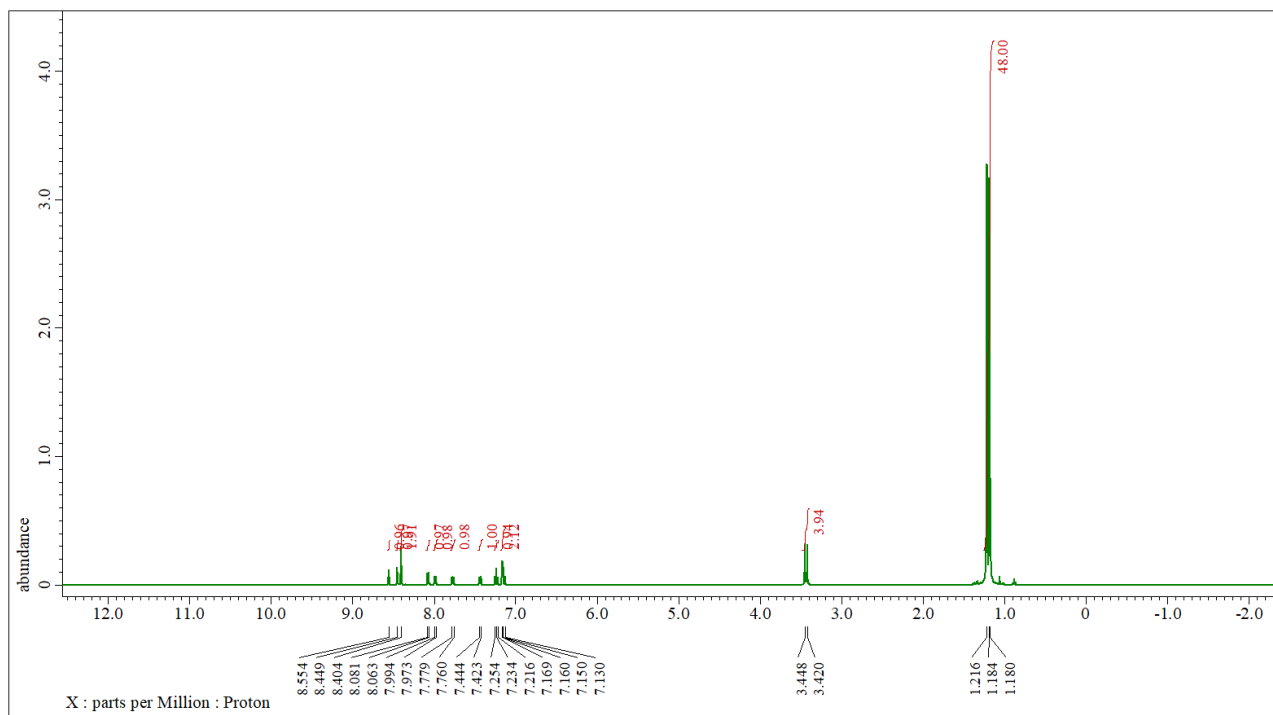

Figure S6.  $^1\text{H}$  NMR spectrum of 3.

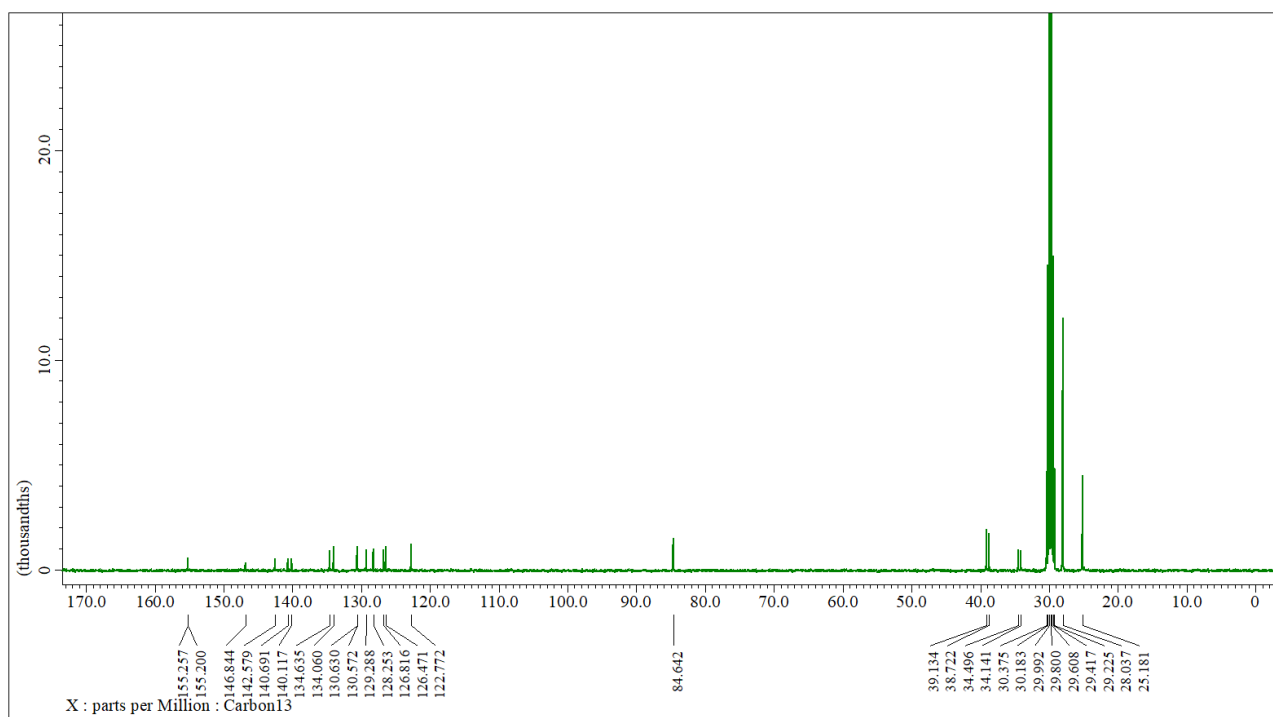

Figure S7.  $^{13}\text{C}\{^1\text{H}\}$  NMR spectrum of 3.

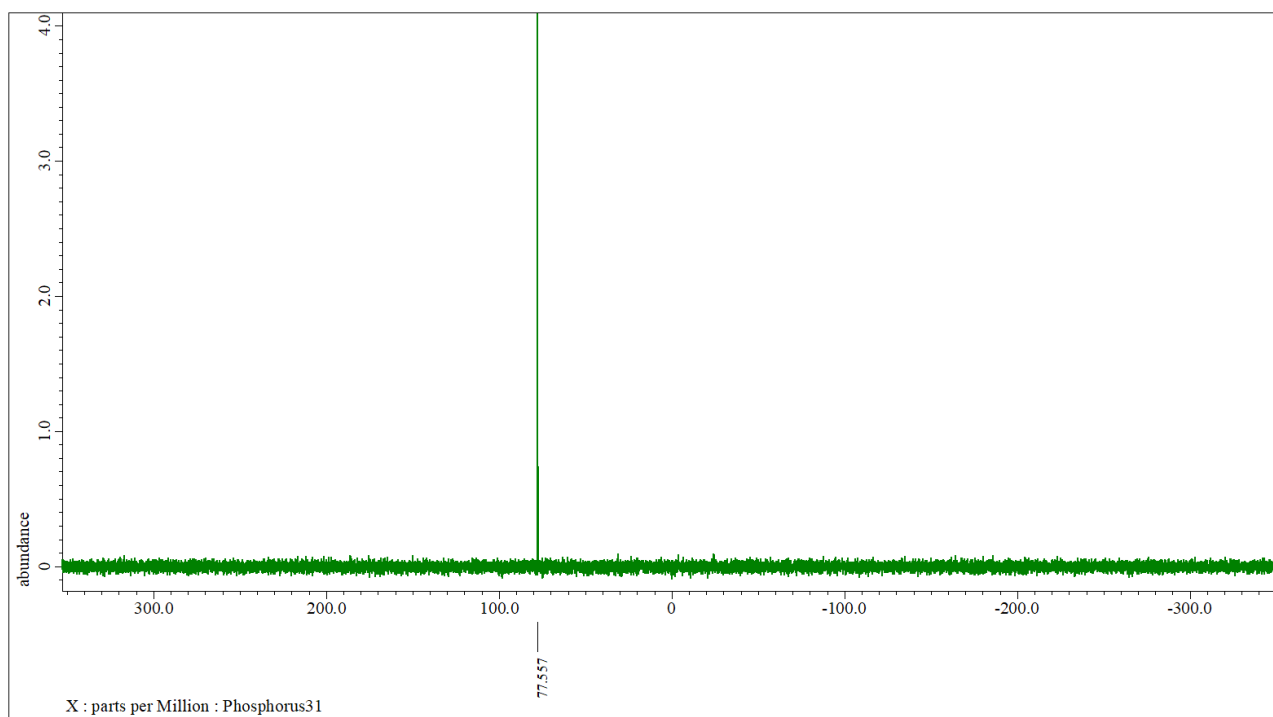

**Figure S8.**  $^{31}\text{P}\{^1\text{H}\}$  NMR spectrum of **3**.

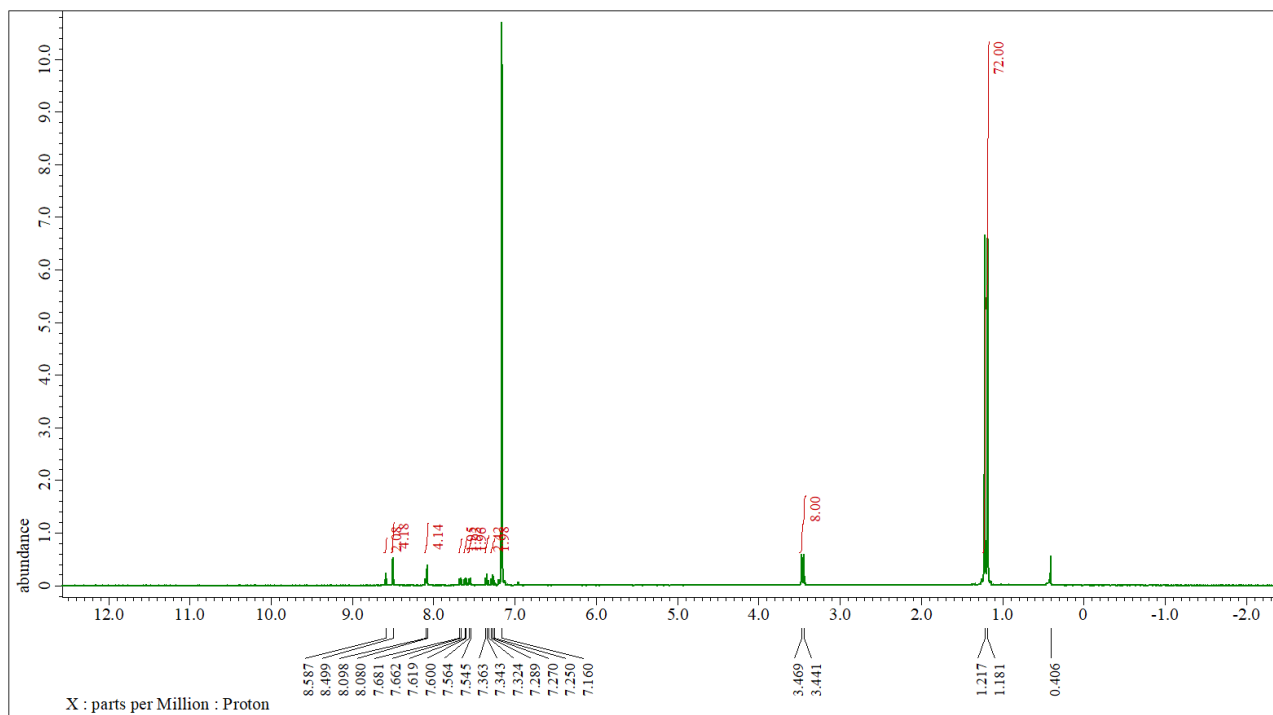

Figure S9.  $^1\text{H}$  NMR spectrum of 4.

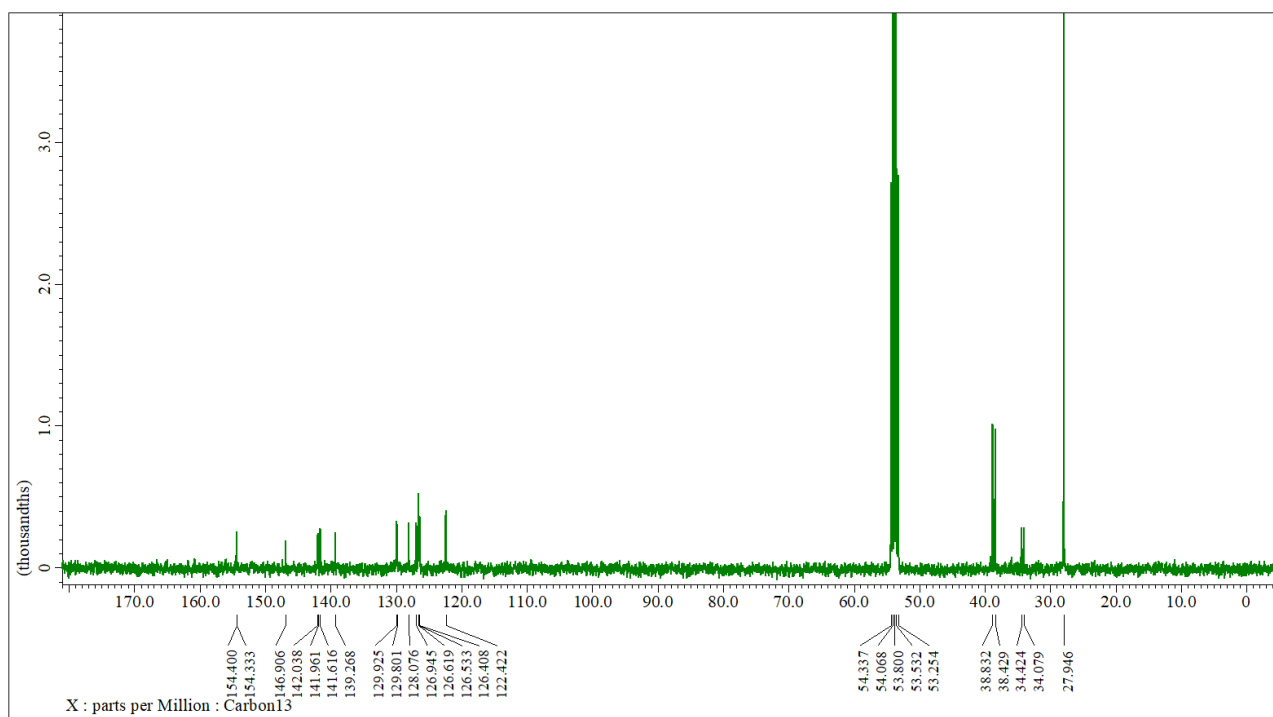

Figure S10.  $^{13}\text{C}\{^1\text{H}\}$  NMR spectrum of 4.

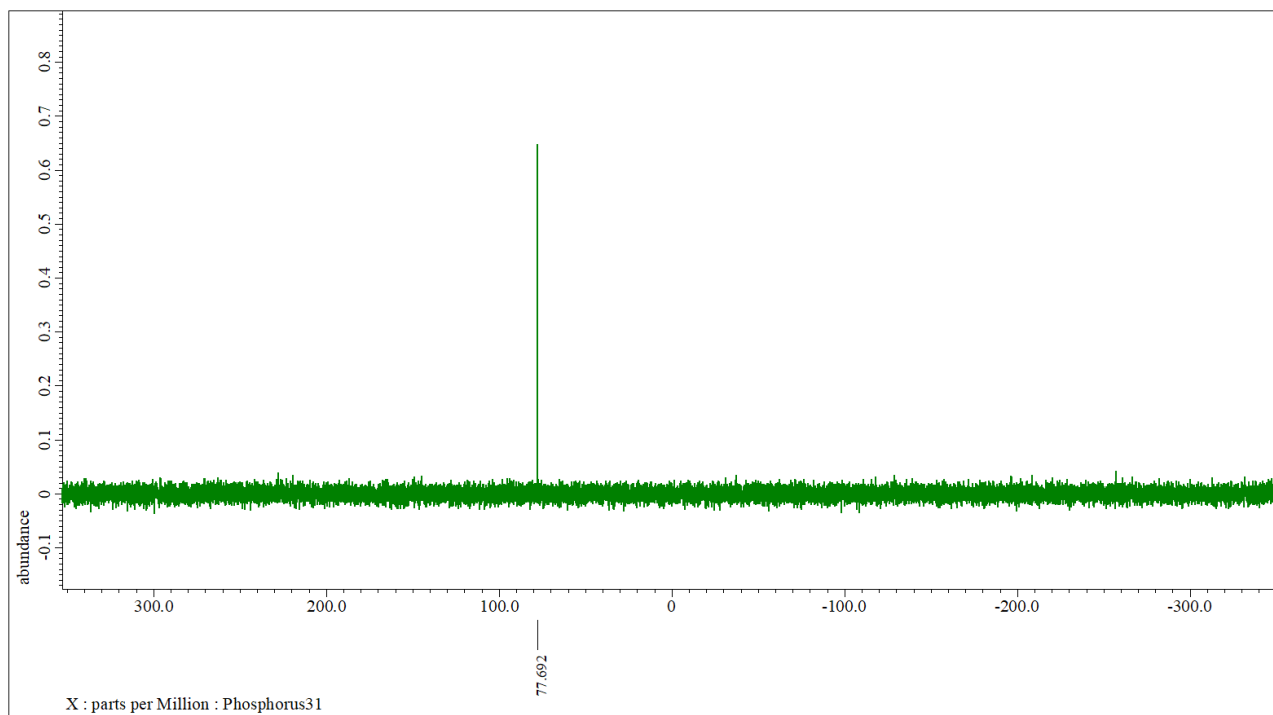

**Figure S11.**  $^{31}\text{P}\{^1\text{H}\}$  NMR spectrum of **4**.



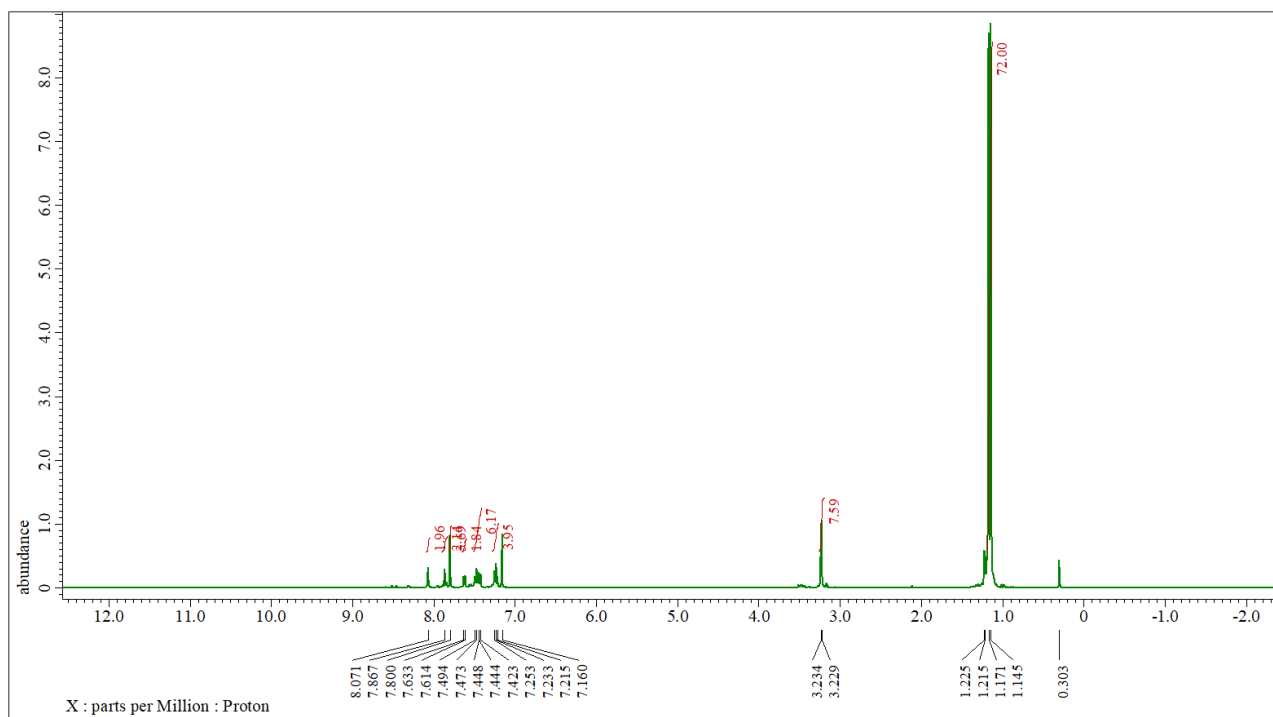

**Figure S12.**  $^1\text{H}$  NMR spectrum of **5**.

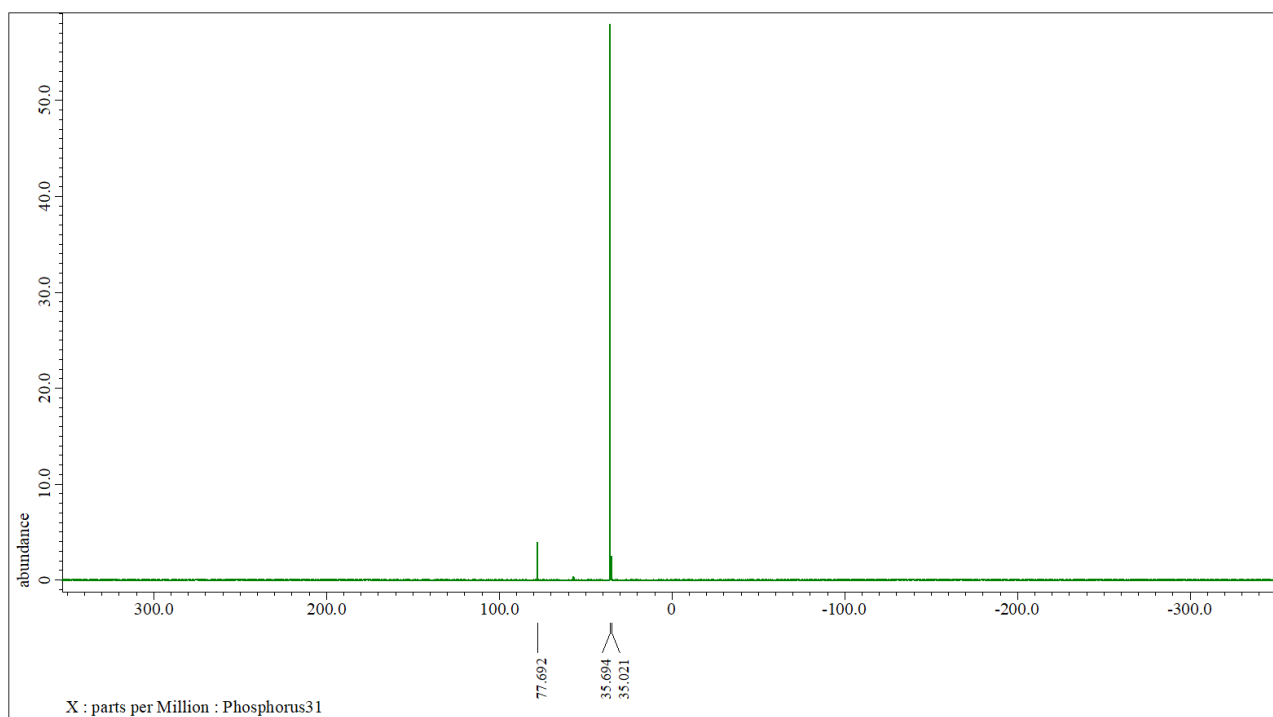

**Figure S13.**  $^{31}\text{P}\{^1\text{H}\}$  NMR spectrum of **5**.

## Computational Details.

Density-functional-theory (DFT) calculations were performed with the Gaussian 09 program (Rev. E01).<sup>S13</sup> All geometry optimizations were carried out with the B3LYP functional with the Grimme's dispersion correction (B3LYP-D3).<sup>S14-18</sup> We employed the SDD (Stuttgart/Dresden pseudopotentials) basis set<sup>S19,20</sup> for Mo and I and the 6-31G(d) basis set<sup>S21-24</sup> for the other atoms, respectively. All stationary-point structures were confirmed to have the appropriate number of imaginary frequencies by vibrational analysis. An appropriate connection between a reactant and a product was confirmed by quasi-IRC calculations. In the quasi-IRC calculation, the geometry of a transition state was shifted by perturbing the geometries very slightly along the reaction coordinates and released for equilibrium optimization. To discuss the energetics of the cleavage of an Mo–N<sub>2</sub> bond of **I**, **II**, and **C**, and the N≡N bond cleavage of **II** and **C**, single-point energy calculations were performed for all optimized structures using the SDD and the 6-311+G(d,p) basis sets.<sup>S25-27</sup> In the single-point calculations, solvation effects of THF ( $\epsilon = 7.4257$ ) were taken into account by using the polarizable continuum model (PCM).<sup>S28</sup> Detailed data on SCF energies, thermal energy corrections at 298 K, and SCF energies in THF are listed in [Table S5](#).

For the cleavage of an Mo–N<sub>2</sub> bond of **I**, **II**, and **C** described in [Figures S14-S16](#), we optimized the corresponding products, in which an MoI(PNP) unit was completely separated from the remaining MoI(N<sub>2</sub>)(PNP) unit. Unfortunately, all our attempts to locate transition states of the Mo–N<sub>2</sub> bond dissociation have failed. This is because even when an MoI(PNP) unit was separated from the bridging N<sub>2</sub> ligand by 5 Å in an initial structure, an Mo–N≡N–Mo structure (reactant) was recovered during optimization. On the other hand, we successfully found transition states for the N≡N bond cleavage of **II** and **C** as presented in [Figures S17 and S18](#).

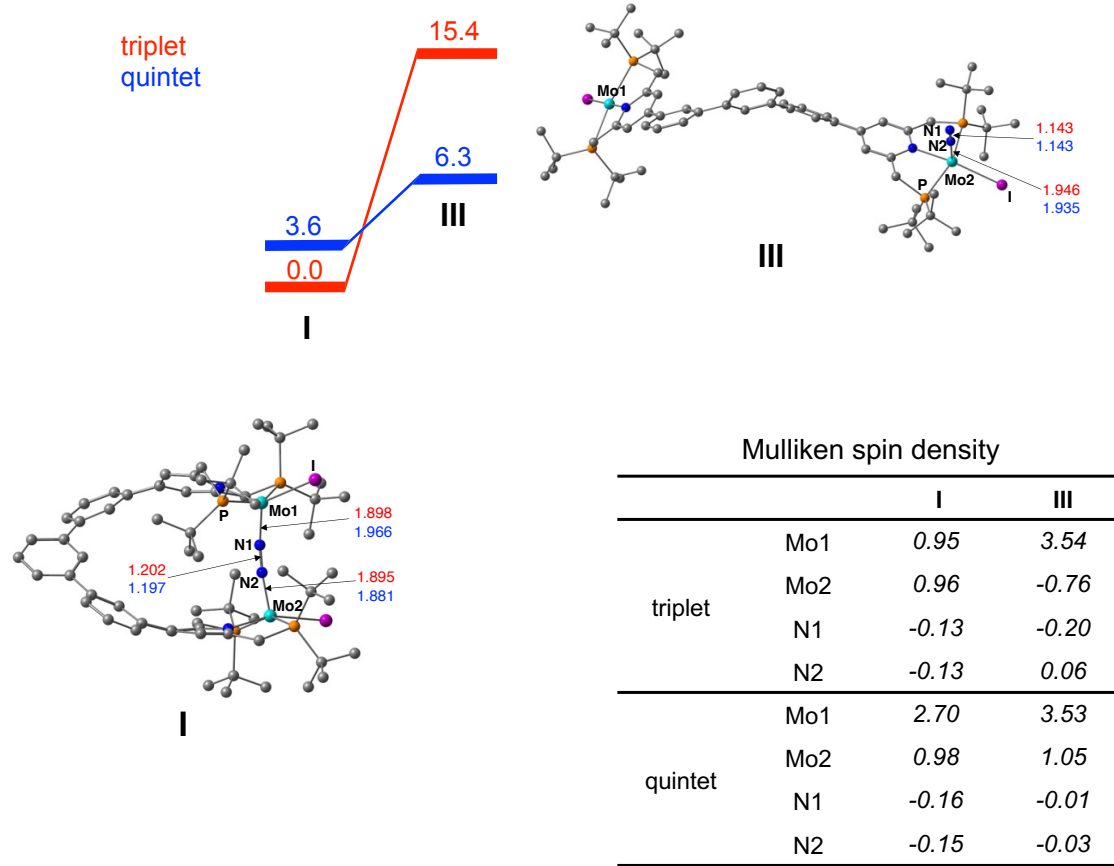

**Figure S14.** Free energy profile calculated at 298.15 K ( $\Delta G_{298}$  kcal/mol in THF) for dissociation of an Mo-N<sub>2</sub> bond of **I** yielding **III**, together with optimized structures of **I** and **III**. Hydrogen atoms attached to carbon atoms are omitted for clarity. Selected bond distances are given in Å. Mulliken spin densities assigned to the Mo atoms and the bridging N<sub>2</sub> ligand are also presented in italics.

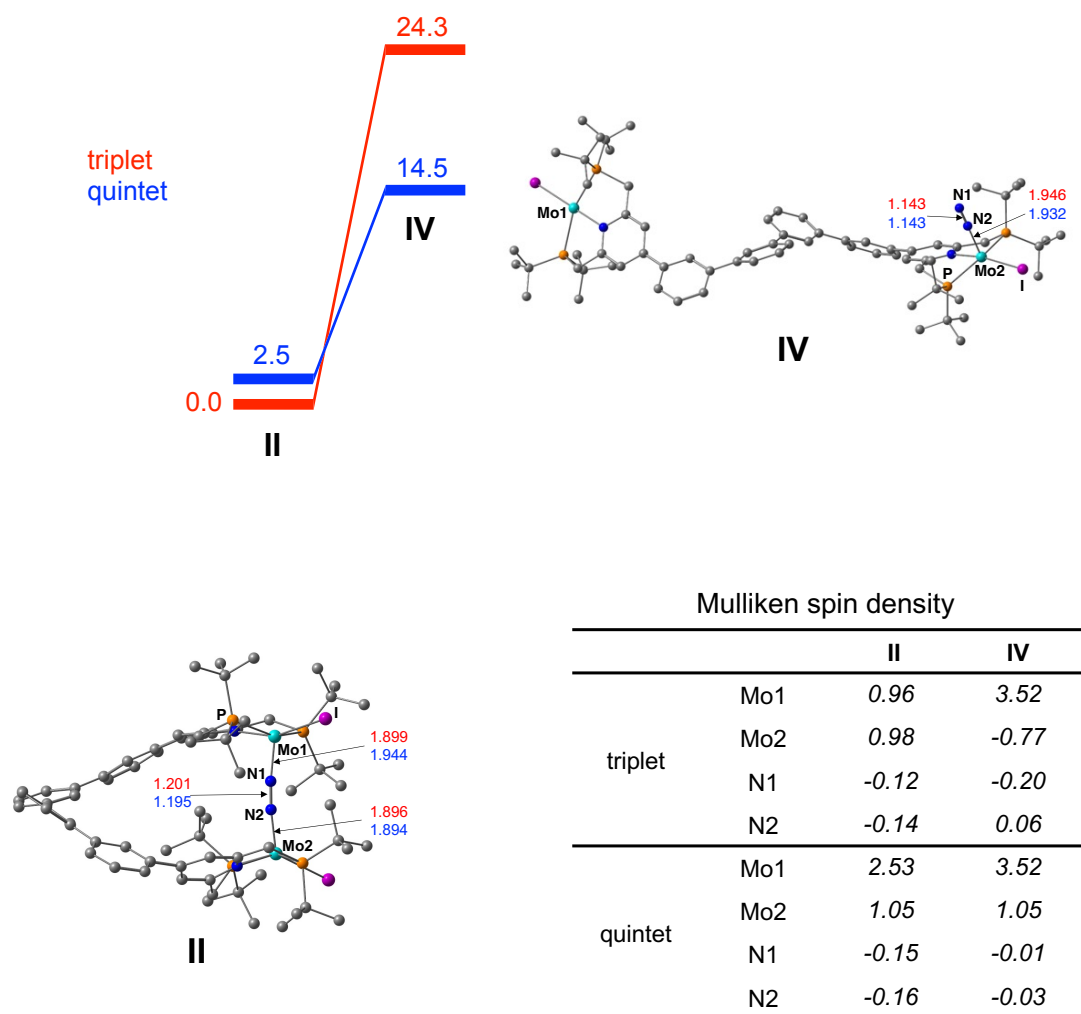

**Figure S15.** Free energy profile calculated at 298.15 K ( $\Delta G_{298}$  kcal/mol in THF) for dissociation of an Mo-N<sub>2</sub> bond of **II** yielding **IV**, together with optimized structures of **II** and **IV**. Hydrogen atoms attached to carbon atoms are omitted for clarity. Selected bond distances are given in Å. Mulliken spin densities assigned to the Mo atoms and the bridging N<sub>2</sub> ligand are also presented in italics.

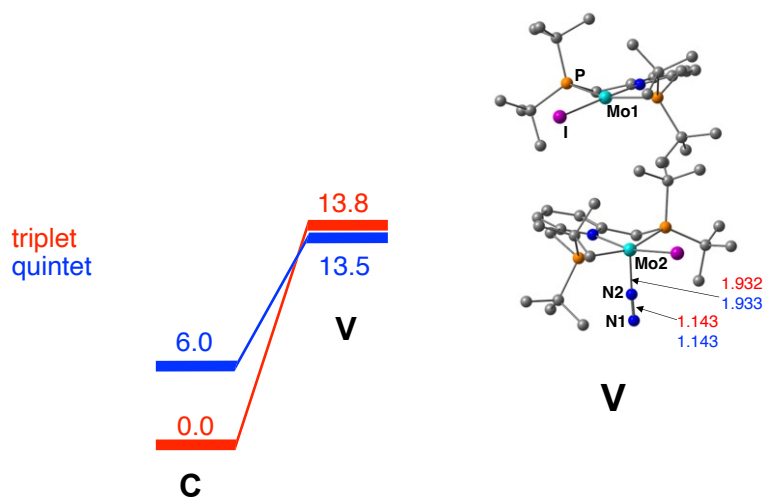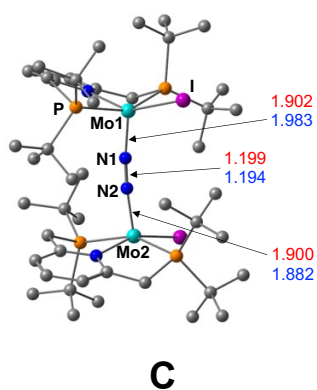

Mulliken spin density

|         |     | <b>C</b> | <b>V</b> |
|---------|-----|----------|----------|
| triplet | Mo1 | 1.03     | 3.43     |
|         | Mo2 | 1.02     | -1.05    |
|         | N1  | -0.13    | 0.02     |
|         | N2  | -0.14    | 0.03     |
| quintet | Mo1 | 2.84     | 3.43     |
|         | Mo2 | 0.94     | 1.05     |
|         | N1  | -0.16    | -0.02    |
|         | N2  | -0.14    | -0.03    |

**Figure S16.** Free energy profile calculated at 298.15 K ( $\Delta G_{298}$  kcal/mol in THF) for dissociation of an Mo-N<sub>2</sub> bond of **C** yielding **V**, together with optimized structures of **C** and **V**. Hydrogen atoms attached to carbon atoms are omitted for clarity. Selected bond distances are given in Å. Mulliken spin densities assigned to the Mo atoms and the bridging N<sub>2</sub> ligand are also presented in italics.

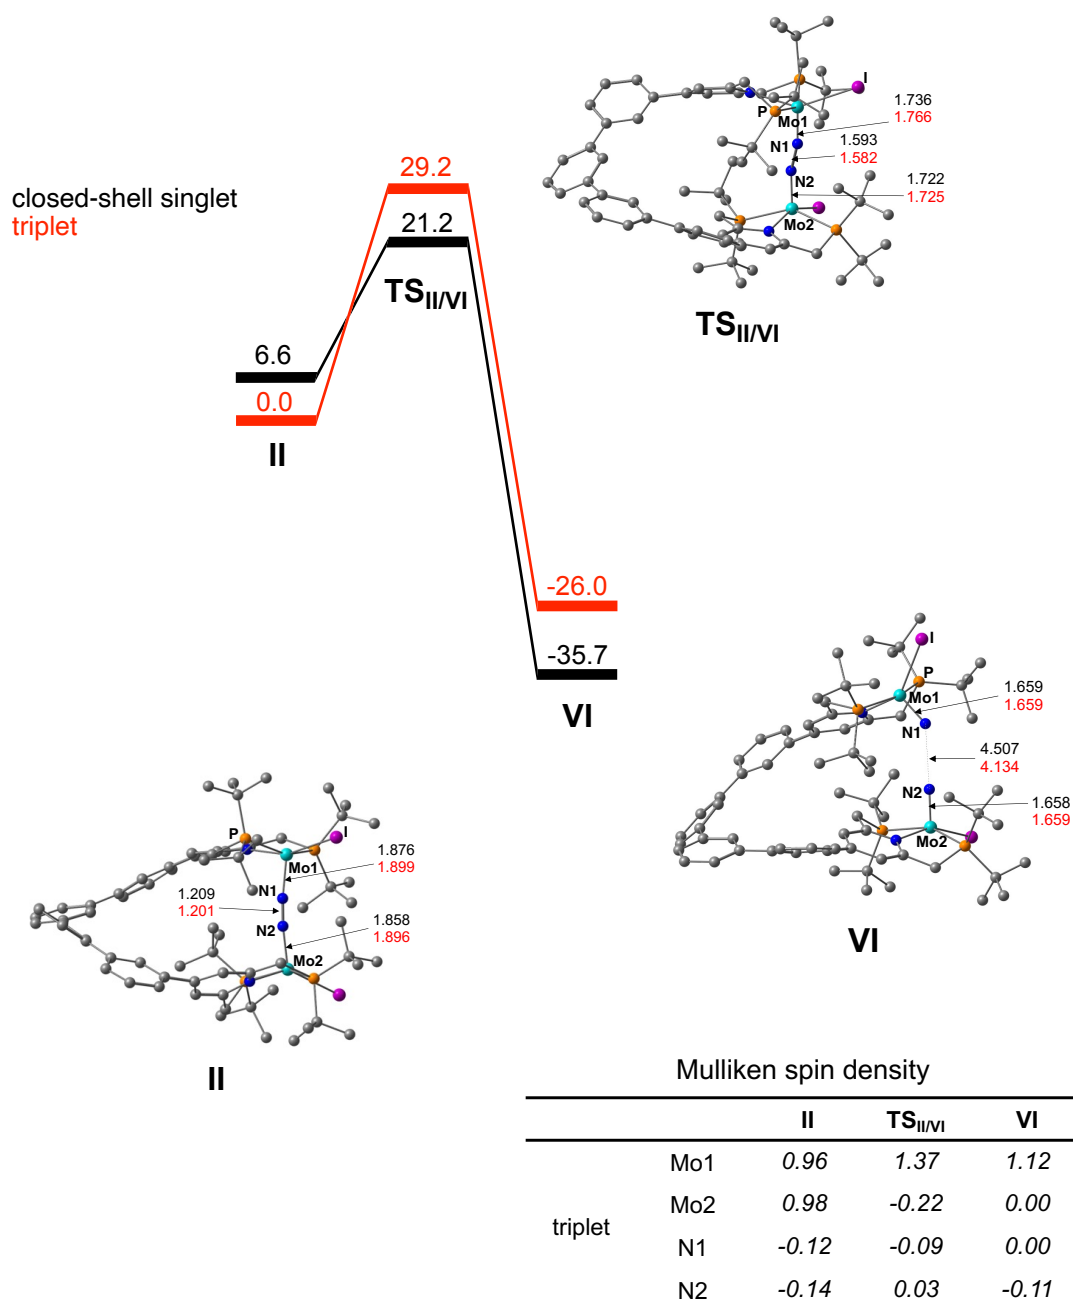

**Figure S17.** Free energy profile calculated at 298.15 K ( $\Delta G_{298}$  kcal/mol in THF) for the  $N\equiv N$  bond cleavage of the bridging dinitrogen ligand in **II** yielding **VI**, together with optimized structures of **II**, transition state (**TS<sub>II/VI</sub>**) and **VI**. Hydrogen atoms attached to carbon atoms are omitted for clarity. Selected bond distances are given in Å. Mulliken spin densities assigned to the Mo atoms and the bridging  $N_2$  ligand in the triplet state are presented in italics.

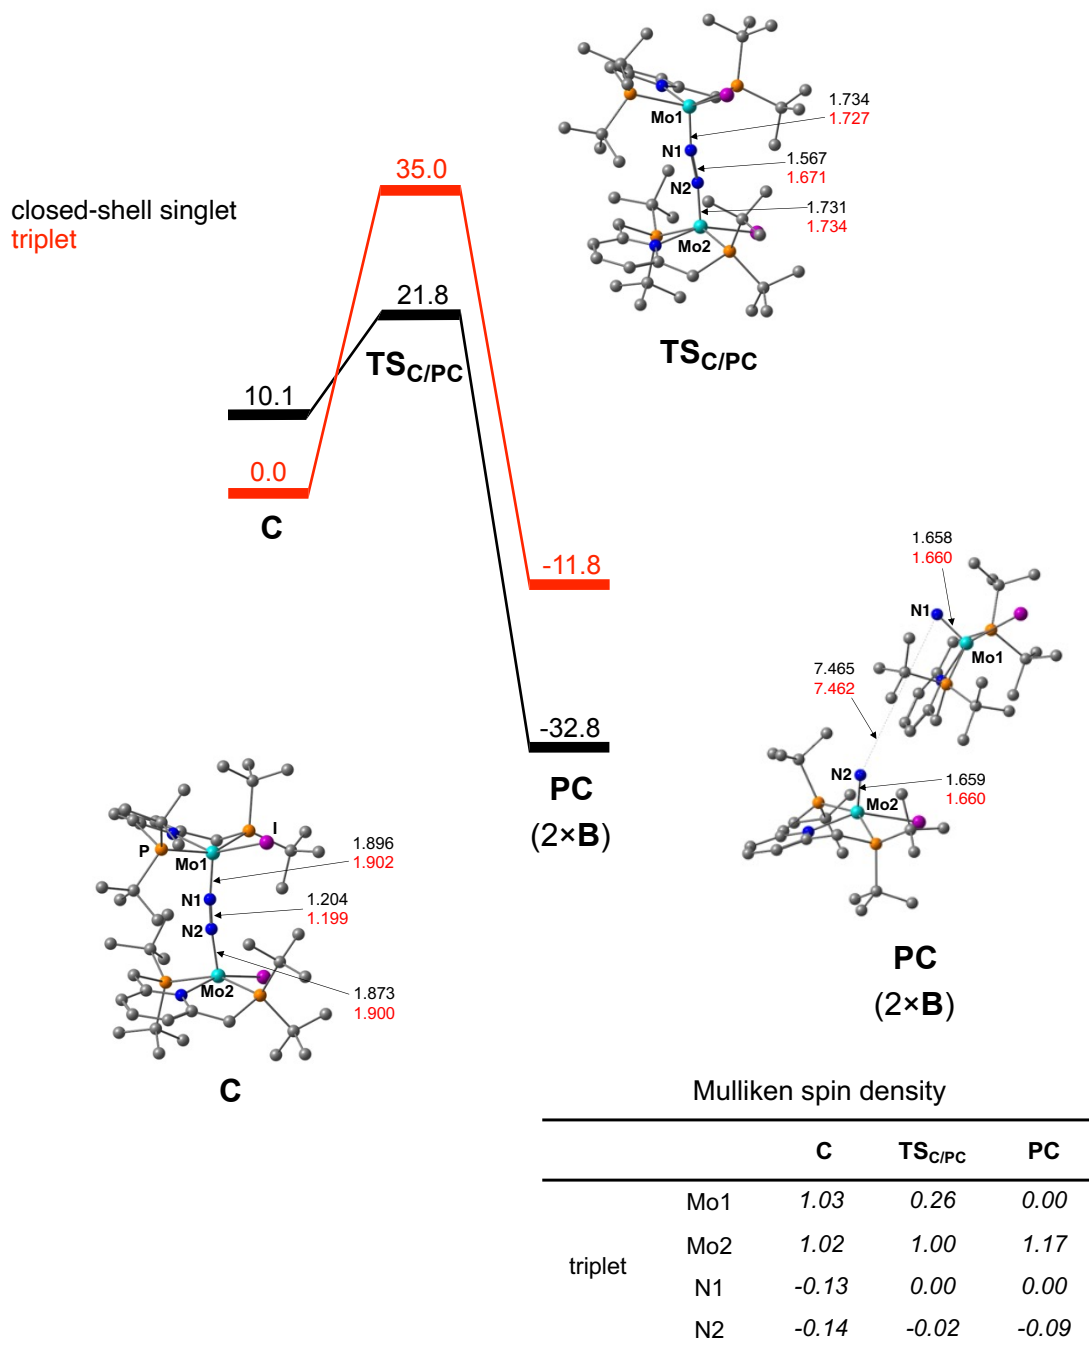

**Figure S18.** Free energy profile calculated at 298.15 K ( $\Delta G_{298}$  kcal/mol in THF) for the N≡N bond cleavage of the bridging dinitrogen ligand in **C** yielding **PC** (or two molecules of **B**), together with optimized structures of **C**, transition state (**TS<sub>C/PC</sub>**) and **PC**. Hydrogen atoms attached to carbon atoms are omitted for clarity. Selected bond distances are given in Å. Mulliken spin densities assigned to the Mo atoms and the bridging N<sub>2</sub> ligand in the triplet state are presented in italics.

**Table S5.** SCF energies (*in vacuo*), thermal energy corrections at 298 K, SCF energies (in THF).

| Species and spin states   |                      | SCF energy/hartree | Thermal corrections/hartree | SCF energy (in THF)/hartree |
|---------------------------|----------------------|--------------------|-----------------------------|-----------------------------|
| <b>I</b>                  | closed-shell singlet | -4240.81103875     | 1.373832                    | -4241.70315208              |
|                           | triplet              | -4240.81945180     | 1.375284                    | -4241.71237005              |
|                           | quintet              | -4240.81170478     | 1.372194                    | -4241.70355617              |
| <b>II</b>                 | closed-shell singlet | -4471.88459228     | 1.448172                    | -4472.83808723              |
|                           | triplet              | -4471.89486556     | 1.448036                    | -4472.84853592              |
|                           | quintet              | -4471.88668785     | 1.443793                    | -4472.84025644              |
| <b>III</b>                | triplet              | -4240.75738213     | 1.356105                    | -4241.66857249              |
|                           | quintet              | -4240.77203208     | 1.356569                    | -4241.68356950              |
| <b>IV</b>                 | triplet              | -4471.82044248     | 1.430717                    | -4472.79245459              |
|                           | quintet              | -4471.83530827     | 1.430792                    | -4472.80826430              |
| <b>V</b>                  | triplet              | -3548.79273544     | 1.152659                    | -3549.52025683              |
|                           | quintet              | -3548.79280291     | 1.152259                    | -3549.52034643              |
| <b>TS<sub>II/VI</sub></b> | closed-shell singlet | -4471.85870329     | 1.445290                    | -4472.81195121              |
|                           | triplet              | -4471.84420466     | 1.443222                    | -4472.79724227              |
| <b>VI</b>                 | closed-shell singlet | -4471.93825086     | 1.446708                    | -4472.90411401              |
|                           | triplet              | -4471.91874080     | 1.438854                    | -4472.88079678              |
| <b>C</b>                  | closed-shell singlet | -3548.81987802     | 1.162819                    | -3549.53633315              |
|                           | triplet              | -3548.83343583     | 1.163178                    | -3549.55277254              |
|                           | quintet              | -3548.82241780     | 1.159785                    | -3549.53975149              |
| <b>TS<sub>C/PC</sub></b>  | closed-shell singlet | -3548.79820293     | 1.160572                    | -3549.51547145              |
|                           | triplet              | -3548.77320571     | 1.156874                    | -3549.49073155              |



|                 |                      |                |          |                |
|-----------------|----------------------|----------------|----------|----------------|
| <b>PC (2×B)</b> | closed-shell singlet | -3548.86565467 | 1.157344 | -3549.59924751 |
|                 | triplet              | -3548.83044817 | 1.153373 | -3549.56179639 |

## 6. Supplementary references.

- S1. G. A. Bain and J. F. Berry, *J. Chem. Educ.*, 2008, **85**, 532-536.
- S2. S. Kuriyama, K. Arashiba, K. Nakajima, H. Tanaka, N. Kamaru, K. Yoshizawa and Y. Nishibayashi, *J. Am. Chem. Soc.* 2014, **136**, 9719-9731.
- S3. F. Stoffelbach, D. Saurens and R. Poli, *Eur. J. Inorg. Chem.*, 2001, 2699-2703.
- S4. R. Poli, S. T. Krueger, S. P. Mattamana, K. R. Dunbar and Z. Hanhua, *Inorg. Synth.*, 1998, **32**, 198-203.
- S5. K. Arashiba, Y. Miyake and Y. Nishibayashi, *Nat. Chem.*, 2011, **3**, 120–125.
- S6. P. L. Watson, T. H. Tulip and I. Williams, *Organometallics*, 1990, **9**, 1999-2009.
- S7. M. W. Weatherburn, *Anal. Chem.*, 1967, **39**, 971-974.
- S8. CrystalStructure 4.3.1: Single Crystal Structure Analysis Software; Rigaku Corp: Tokyo, Japan, and MSC: The Woodlands, TX, 2018.
- S9. M. C. Burla, R. Caliendo, M. Camalli, B. Carrozzini, G. L. Casciarano, C. Giacovazzo, M. Mallamo, A. Mazzone, G. Polidori and R. Spagna, *J. Appl. Cryst.*, 2012, **45**, 357-361.
- S10. G. M. Sheldrick, *Acta Crystallogr.*, 2008, **A64**, 112-122.
- S11. G. M. Sheldrick, *Acta Crystallogr.*, 2015, **C71**, 3-8.
- S12. A. L. Spek, *Acta Crystallogr.*, 2015, **C71**, 9-18.
- S13. *Gaussian 09, Revision E.01*: M. J. Frisch, G. W. Trucks, H. B. Schlegel, G. E. Scuseria, M. A. Robb, J. R. Cheeseman, G. Scalmani, V. Barone, B. Mennucci, G. A. Petersson, H. Nakatsuji, M. Caricato, X. Li, H. P. Hratchian, A. F. Izmaylov, J. Bloino, G. Zheng, J. L. Sonnenberg, M. Hada, M. Ehara, K. Toyota, R. Fukuda, J. Hasegawa, M. Ishida, T. Nakajima, Y. Honda, O. Kitao, H. Nakai, T. Vreven, J. A. Montgomery, Jr., J. E. Peralta, F. Ogliaro, M. Bearpark, J. J. Heyd, E. Brothers, K. N. Kudin, V. N. Staroverov, T. Keith, R. Kobayashi, J. Normand, K. Raghavachari, A. Rendell, J. C. Burant, S. S. Iyengar, J. Tomasi, M. Cossi, N. Rega, J. M. Millam, M. Klene, J. E. Knox, J. B. Cross, V. Bakken, C. Adamo, J. Jaramillo, R. Gomperts, R. E. Stratmann, O. Yazyev, A. J. Austin, R. Cammi, C. Pomelli, J. W. Ochterski, R. L. Martin, K. Morokuma, V. G. Zakrzewski, G. A. Voth, P. Salvador, J. J. Dannenberg, S. Dapprich, A. D. Daniels, O. Farkas, J. B. Foresman, J. V. Ortiz, J. Cioslowski, and D. J. Fox, Gaussian, Inc.: Wallingford CT, 2013.
- S14. Becke, A. D. *Phys. Rev. A*, 1988, **38**, 3098-3100.
- S15. Becke, A. D. *J. Chem. Phys.*, 1993, **98**, 5648-5642.
- S16. Lee, C.; Yang, W.; Parr, R. G. *Phys. Rev. B*, 1988, **37**, 785-789.
- S17. Vosko, S. H.; Wilk, L.; Nusair, M. J. *Can. J. Phys.*, 1980, **58**, 1200-1211.
- S18. Grimme, S.; Antony, J.; Ehrlich, S.; Krieg, H. *J. Phys. Chem.*, 2010, **132**, 154104.
- S19. Dolg, M.; Wedig, U.; Stoll, H.; Preuß, H. *J. Chem. Phys.*, 1987, **86**, 866-872.

- S20. Andrae, D.; Häußermann, U.; Dolg, M.; Stoll, H.; Preuß, H. *Theor. Chim. Acta.*, 1990, **77**, 123-141.
- S21. Ditchfield, R.; Hehre, W. J.; Pople, J. A. *J. Chem. Phys.*, 1971, **54**, 724-728.
- S22. Hehre, W. J.; Ditchfield, R.; Pople, J. A. *J. Chem. Phys.*, 1972, **56**, 2257-2261.
- S23. Hariharan, P. C.; Pople, J. A. *Theor. Chem. Acc.*, 1973, **28**, 213-222.
- S24. Francl, M. M.; Pietro, W. J.; Hehre, W. J.; Binkley, J. S.; Gordon, M. S.; DeFrees, D. J.; Pople, J. A. *J. Chem. Phys.*, 1982, **77**, 3654-3665.
- S25. Krishnan, R.; Binkley, J. S.; Seeger, R.; Pople, J. A., *J. Chem. Phys.*, 1980, **72**, 650-654.
- S26. McLean, A. D.; Chandler, G. S., *J. Chem. Phys.*, 1980, **72**, 5639-5648.
- S27. Clark, T.; Chandrasekhar, J.; Spitznagel, G. W.; Schleyer, P. v. R., *J. Comput. Chem.*, 1983, **4**, 294-301.
- S28. Tomasi, J.; Mennucci, B.; Cammi, R. *Chem. Rev.*, 2005, **105**, 2999-3094.
