# Supplementary material for: Design, synthesis and reactivity of dimolybdenum complex bearing quaterphenylene-bridged pyridine-based PNP-type pincer ligand
Source: Royal Society of Chemistry journal article supplement (doi:10.1039/d3dt02887a), 2023-01-01
Supplement: d3dt02887a2.pdf [file d3dt02887a2.pdf]

172

**I** in the closed-shell singlet state SCF = -4240.81103875

|    |           |           |           |
|----|-----------|-----------|-----------|
| Mo | 2.038552  | 2.015563  | 0.141606  |
| Mo | 0.534244  | -2.675979 | -0.258604 |
| I  | 4.609013  | 1.965057  | 1.429941  |
| I  | 2.343289  | -4.199756 | -1.843062 |
| P  | 2.745885  | 2.107028  | -2.155836 |
| P  | 1.061188  | 3.462922  | 2.019527  |
| P  | 1.493879  | -3.387955 | 1.868884  |
| P  | -1.362429 | -2.525273 | -1.943544 |
| N  | 1.373092  | 0.250655  | 0.075140  |
| N  | 0.982790  | -0.890715 | -0.004117 |
| N  | 0.229663  | 2.845612  | -0.775463 |
| N  | -1.179871 | -2.817886 | 1.026130  |
| C  | 1.250391  | 2.844825  | -3.026230 |
| C  | 0.031373  | 2.923941  | -2.139981 |
| C  | -1.220919 | 3.128035  | -2.704146 |
| C  | -2.361281 | 3.348301  | -1.904554 |
| C  | -2.091602 | 3.499635  | -0.535896 |
| C  | -0.849701 | 3.216721  | -0.003392 |
| C  | -0.707562 | 3.240456  | 1.495998  |
| C  | 4.125215  | 3.366683  | -2.640162 |
| C  | 4.094339  | 3.830342  | -4.112547 |
| C  | 3.917985  | 4.609121  | -1.748272 |
| C  | 5.512331  | 2.771132  | -2.330075 |
| C  | 3.067866  | 0.438586  | -3.050652 |
| C  | 1.700682  | -0.252236 | -3.221486 |
| C  | 3.701859  | 0.533136  | -4.450327 |
| C  | 3.962464  | -0.423277 | -2.133653 |
| C  | 1.358151  | 5.348429  | 1.989375  |
| C  | 0.908415  | 5.856744  | 0.601360  |
| C  | 0.581786  | 6.123962  | 3.067203  |
| C  | 2.870375  | 5.611949  | 2.139925  |
| C  | 1.023442  | 2.785427  | 3.804991  |
| C  | -0.227498 | 3.191941  | 4.610638  |
| C  | 2.294675  | 3.203329  | 4.569035  |

|   |           |           |           |
|---|-----------|-----------|-----------|
| C | 1.029716  | 1.251730  | 3.647393  |
| C | 0.301048  | -2.373825 | 2.932174  |
| C | -1.085871 | -2.440540 | 2.344704  |
| C | -2.225583 | -2.089027 | 3.067615  |
| C | -3.500763 | -2.205222 | 2.485811  |
| C | -3.567151 | -2.867058 | 1.248124  |
| C | -2.416938 | -3.140142 | 0.532794  |
| C | -2.437089 | -3.665010 | -0.860570 |
| C | 1.110243  | -5.233272 | 2.301801  |
| C | 2.319716  | -6.121123 | 1.942406  |
| C | 0.710621  | -5.432214 | 3.776284  |
| C | -0.066090 | -5.724214 | 1.425039  |
| C | 3.221986  | -2.934585 | 2.560722  |
| C | 3.302116  | -1.399547 | 2.633703  |
| C | 4.287049  | -3.396571 | 1.542496  |
| C | 3.531729  | -3.485262 | 3.964813  |
| C | -1.475963 | -3.468860 | -3.625719 |
| C | -0.385129 | -2.898200 | -4.555466 |
| C | -1.163585 | -4.961902 | -3.373694 |
| C | -2.848376 | -3.411329 | -4.322960 |
| C | -2.457898 | -0.927750 | -2.044910 |
| C | -2.089786 | -0.117636 | -3.303310 |
| C | -3.978363 | -1.190744 | -2.042310 |
| C | -2.133893 | -0.052789 | -0.813523 |
| H | 1.505881  | 3.877663  | -3.290549 |
| H | 1.023016  | 2.339470  | -3.969265 |
| H | -1.312057 | 3.058311  | -3.783578 |
| H | -2.881577 | 3.778170  | 0.152307  |
| H | -1.399740 | 3.969246  | 1.933238  |
| H | -0.990178 | 2.255985  | 1.890659  |
| H | 3.151228  | 4.314621  | -4.387220 |
| H | 4.277395  | 3.019964  | -4.818321 |
| H | 4.887853  | 4.575282  | -4.259414 |
| H | 5.770943  | 1.955580  | -3.010089 |
| H | 5.577309  | 2.400983  | -1.304592 |
| H | 6.274089  | 3.552899  | -2.453120 |

|   |           |           |           |
|---|-----------|-----------|-----------|
| H | 2.936106  | 5.072609  | -1.901666 |
| H | 4.678572  | 5.363343  | -1.992307 |
| H | 4.025489  | 4.362837  | -0.688295 |
| H | 1.075380  | -0.181796 | -2.332624 |
| H | 1.145014  | 0.159828  | -4.071458 |
| H | 1.861933  | -1.315898 | -3.416169 |
| H | 3.114340  | 1.164753  | -5.127037 |
| H | 3.729728  | -0.473716 | -4.887832 |
| H | 4.728719  | 0.905763  | -4.429054 |
| H | 4.124229  | -1.401545 | -2.602477 |
| H | 4.936873  | 0.039325  | -1.952600 |
| H | 3.493373  | -0.597759 | -1.163496 |
| H | 1.383283  | 5.298307  | -0.210232 |
| H | -0.175944 | 5.791228  | 0.466359  |
| H | 1.194545  | 6.911520  | 0.500264  |
| H | -0.495501 | 5.927689  | 3.024471  |
| H | 0.724734  | 7.200778  | 2.906121  |
| H | 0.936052  | 5.896780  | 4.076131  |
| H | 3.058911  | 6.688391  | 2.033186  |
| H | 3.256141  | 5.300270  | 3.112929  |
| H | 3.451594  | 5.084531  | 1.379343  |
| H | -1.155688 | 2.854528  | 4.137848  |
| H | -0.299003 | 4.269161  | 4.772768  |
| H | -0.177012 | 2.715073  | 5.598609  |
| H | 2.300785  | 4.272690  | 4.800912  |
| H | 2.327334  | 2.663640  | 5.524784  |
| H | 3.204587  | 2.957203  | 4.012899  |
| H | 1.039432  | 0.781971  | 4.640344  |
| H | 1.914356  | 0.919398  | 3.101408  |
| H | 0.143201  | 0.884399  | 3.117271  |
| H | 0.689161  | -1.355600 | 2.836995  |
| H | 0.280474  | -2.618035 | 4.000673  |
| H | -2.110123 | -1.656271 | 4.057069  |
| H | -4.528834 | -3.091604 | 0.800512  |
| H | -3.455967 | -3.787275 | -1.236892 |
| H | -1.951345 | -4.645902 | -0.896056 |

|   |           |           |           |
|---|-----------|-----------|-----------|
| H | 2.617409  | -5.982466 | 0.897480  |
| H | 2.038249  | -7.174443 | 2.073693  |
| H | 3.186996  | -5.937338 | 2.579136  |
| H | 1.476614  | -5.092998 | 4.476171  |
| H | 0.541193  | -6.501022 | 3.964854  |
| H | -0.223623 | -4.909872 | 4.011861  |
| H | -1.005049 | -5.217989 | 1.658427  |
| H | -0.217160 | -6.797058 | 1.605582  |
| H | 0.149333  | -5.604306 | 0.356058  |
| H | 2.973728  | -0.913402 | 1.713875  |
| H | 4.343464  | -1.098430 | 2.792205  |
| H | 2.724102  | -1.001635 | 3.472049  |
| H | 4.311739  | -4.477670 | 1.397195  |
| H | 5.275698  | -3.084235 | 1.903665  |
| H | 4.121785  | -2.935040 | 0.565301  |
| H | 2.781009  | -3.170083 | 4.699234  |
| H | 4.498640  | -3.083535 | 4.296054  |
| H | 3.606681  | -4.574723 | 3.994631  |
| H | -0.514149 | -1.830020 | -4.749004 |
| H | -0.424429 | -3.418759 | -5.522094 |
| H | 0.609485  | -3.054141 | -4.130310 |
| H | -0.264854 | -5.110090 | -2.771573 |
| H | -0.987381 | -5.449979 | -4.340993 |
| H | -2.004056 | -5.482226 | -2.900897 |
| H | -3.649817 | -3.795275 | -3.682231 |
| H | -2.815729 | -4.048531 | -5.217085 |
| H | -3.123077 | -2.407495 | -4.653167 |
| H | -1.028981 | 0.141584  | -3.318699 |
| H | -2.658312 | 0.818351  | -3.299428 |
| H | -2.332586 | -0.640508 | -4.230456 |
| H | -4.313740 | -1.816219 | -2.870688 |
| H | -4.500067 | -0.227796 | -2.124870 |
| H | -4.308296 | -1.653890 | -1.108339 |
| H | -2.319096 | -0.569593 | 0.131048  |
| H | -2.778564 | 0.831935  | -0.840614 |
| H | -1.099011 | 0.289463  | -0.811663 |

|   |            |           |           |
|---|------------|-----------|-----------|
| C | -6.578311  | -0.039528 | 2.377499  |
| C | -6.934144  | 0.037930  | 3.734373  |
| C | -6.186398  | -0.644074 | 4.699065  |
| C | -5.066167  | -1.399956 | 4.344888  |
| C | -4.705574  | -1.513537 | 2.993754  |
| C | -5.485835  | -0.844916 | 2.037723  |
| H | -7.766661  | 0.665145  | 4.040755  |
| H | -6.469800  | -0.566998 | 5.745351  |
| H | -4.485850  | -1.910684 | 5.108675  |
| H | -5.199376  | -0.919798 | 0.995571  |
| C | -8.358847  | 2.316924  | -0.757099 |
| C | -9.158679  | 1.827073  | 0.278312  |
| C | -8.613362  | 1.060524  | 1.310867  |
| C | -7.242429  | 0.759524  | 1.312124  |
| C | -6.460526  | 1.251816  | 0.258284  |
| C | -6.982851  | 2.039061  | -0.777726 |
| H | -8.798006  | 2.940046  | -1.531132 |
| H | -10.221934 | 2.051836  | 0.283815  |
| H | -9.254427  | 0.678207  | 2.100428  |
| H | -5.402248  | 1.021980  | 0.250528  |
| C | -5.479473  | 3.201643  | -4.087994 |
| C | -6.430608  | 2.765748  | -3.160085 |
| C | -6.058702  | 2.565162  | -1.819699 |
| C | -4.732876  | 2.831353  | -1.464478 |
| C | -3.750835  | 3.246976  | -2.381505 |
| C | -4.153305  | 3.432107  | -3.718097 |
| H | -5.775611  | 3.349253  | -5.123285 |
| H | -7.443842  | 2.547161  | -3.484820 |
| H | -4.443520  | 2.675039  | -0.434523 |
| H | -3.436605  | 3.765928  | -4.463144 |

172

**I** in the triplet state SCF = -4240.81945180

|    |          |           |           |
|----|----------|-----------|-----------|
| Mo | 1.973449 | 2.178277  | 0.183224  |
| Mo | 0.642198 | -2.570010 | -0.276262 |
| I  | 4.576559 | 2.081657  | 1.410534  |

|   |           |           |           |
|---|-----------|-----------|-----------|
| I | 2.480298  | -4.068828 | -1.903401 |
| P | 2.706897  | 2.229042  | -2.169024 |
| P | 0.894588  | 3.256369  | 2.132501  |
| P | 1.614634  | -3.364304 | 1.833021  |
| P | -1.286302 | -2.505356 | -1.987947 |
| N | 1.282852  | 0.411038  | 0.213710  |
| N | 0.955486  | -0.740511 | 0.104284  |
| N | 0.140331  | 2.944283  | -0.749161 |
| N | -1.058605 | -2.787084 | 0.983526  |
| C | 1.191712  | 3.007925  | -2.990303 |
| C | -0.036875 | 3.027637  | -2.111619 |
| C | -1.297728 | 3.169477  | -2.686379 |
| C | -2.447173 | 3.334140  | -1.892385 |
| C | -2.205906 | 3.465364  | -0.517383 |
| C | -0.961591 | 3.212415  | 0.026458  |
| C | -0.860861 | 3.139661  | 1.528216  |
| C | 4.064665  | 3.502625  | -2.649037 |
| C | 4.017484  | 3.991604  | -4.111859 |
| C | 3.850705  | 4.721027  | -1.722587 |
| C | 5.457739  | 2.910024  | -2.359492 |
| C | 2.997558  | 0.572447  | -3.067695 |
| C | 1.623249  | -0.105384 | -3.204558 |
| C | 3.613883  | 0.663924  | -4.474377 |
| C | 3.896799  | -0.285702 | -2.151244 |
| C | 1.205784  | 5.152418  | 2.246348  |
| C | 0.811340  | 5.777462  | 0.888347  |
| C | 0.388335  | 5.849977  | 3.347250  |
| C | 2.707184  | 5.421364  | 2.474224  |
| C | 0.741706  | 2.500136  | 3.883810  |
| C | -0.513741 | 2.904672  | 4.682074  |
| C | 2.014698  | 2.814846  | 4.691594  |
| C | 0.689484  | 0.980388  | 3.642032  |
| C | 0.396326  | -2.431248 | 2.930479  |
| C | -0.985785 | -2.486211 | 2.328891  |
| C | -2.134937 | -2.194313 | 3.061608  |
| C | -3.407704 | -2.305047 | 2.470851  |

|   |           |           |           |
|---|-----------|-----------|-----------|
| C | -3.446886 | -2.935164 | 1.212916  |
| C | -2.290441 | -3.153920 | 0.494801  |
| C | -2.298018 | -3.673732 | -0.901676 |
| C | 1.288469  | -5.234516 | 2.185575  |
| C | 2.520847  | -6.073937 | 1.791070  |
| C | 0.903797  | -5.499788 | 3.654260  |
| C | 0.118344  | -5.720689 | 1.298591  |
| C | 3.332990  | -2.875824 | 2.524438  |
| C | 3.368398  | -1.340748 | 2.648485  |
| C | 4.403785  | -3.272223 | 1.485057  |
| C | 3.667049  | -3.465699 | 3.906773  |
| C | -1.368941 | -3.447631 | -3.670979 |
| C | -0.300683 | -2.839981 | -4.602405 |
| C | -1.007044 | -4.929673 | -3.420888 |
| C | -2.744697 | -3.433827 | -4.363554 |
| C | -2.433431 | -0.945241 | -2.082722 |
| C | -2.109601 | -0.115688 | -3.340039 |
| C | -3.943014 | -1.268013 | -2.071067 |
| C | -2.136561 | -0.066363 | -0.848183 |
| H | 1.449185  | 4.054899  | -3.187497 |
| H | 0.966783  | 2.565136  | -3.965511 |
| H | -1.381387 | 3.093847  | -3.765779 |
| H | -3.017162 | 3.685861  | 0.165874  |
| H | -1.550574 | 3.857461  | 1.987698  |
| H | -1.192700 | 2.140405  | 1.836633  |
| H | 3.068727  | 4.473736  | -4.370573 |
| H | 4.196853  | 3.190139  | -4.829605 |
| H | 4.805814  | 4.742296  | -4.256847 |
| H | 5.714909  | 2.108645  | -3.057171 |
| H | 5.532075  | 2.521784  | -1.341096 |
| H | 6.213797  | 3.698460  | -2.474162 |
| H | 2.859311  | 5.174984  | -1.847143 |
| H | 4.592931  | 5.495254  | -1.958824 |
| H | 3.985258  | 4.452559  | -0.669562 |
| H | 1.033561  | -0.046509 | -2.289375 |
| H | 1.040809  | 0.328159  | -4.025277 |

|   |           |           |           |
|---|-----------|-----------|-----------|
| H | 1.772336  | -1.165586 | -3.425142 |
| H | 3.017897  | 1.293850  | -5.145394 |
| H | 3.639745  | -0.343944 | -4.909290 |
| H | 4.639798  | 1.039946  | -4.463757 |
| H | 4.064477  | -1.261844 | -2.620984 |
| H | 4.867664  | 0.182114  | -1.965343 |
| H | 3.424421  | -0.464880 | -1.182416 |
| H | 1.348366  | 5.320090  | 0.051760  |
| H | -0.261086 | 5.696086  | 0.684122  |
| H | 1.066507  | 6.845167  | 0.902144  |
| H | -0.685555 | 5.651108  | 3.259027  |
| H | 0.528309  | 6.936250  | 3.265263  |
| H | 0.713240  | 5.557371  | 4.348986  |
| H | 2.876034  | 6.506637  | 2.494014  |
| H | 3.072708  | 5.009219  | 3.417015  |
| H | 3.325805  | 4.995153  | 1.680183  |
| H | -1.439797 | 2.665911  | 4.147748  |
| H | -0.534270 | 3.963457  | 4.944414  |
| H | -0.529684 | 2.336349  | 5.621989  |
| H | 2.067835  | 3.868252  | 4.982491  |
| H | 2.011380  | 2.222382  | 5.616459  |
| H | 2.919905  | 2.560700  | 4.129932  |
| H | 0.682646  | 0.457128  | 4.608026  |
| H | 1.559700  | 0.652027  | 3.072983  |
| H | -0.209220 | 0.671884  | 3.095203  |
| H | 0.773228  | -1.408742 | 2.895359  |
| H | 0.375717  | -2.736265 | 3.982751  |
| H | -2.028400 | -1.808869 | 4.071862  |
| H | -4.399107 | -3.186872 | 0.758828  |
| H | -3.313469 | -3.843415 | -1.269233 |
| H | -1.764848 | -4.630653 | -0.935614 |
| H | 2.812269  | -5.890537 | 0.751645  |
| H | 2.268433  | -7.138460 | 1.885770  |
| H | 3.383680  | -5.887984 | 2.433589  |
| H | 1.663104  | -5.165346 | 4.363961  |
| H | 0.769230  | -6.579944 | 3.801072  |



|   |           |           |           |
|---|-----------|-----------|-----------|
| H | -0.044944 | -5.016966 | 3.913609  |
| H | -0.824846 | -5.225564 | 1.540041  |
| H | -0.022422 | -6.797575 | 1.463001  |
| H | 0.333391  | -5.579760 | 0.233114  |
| H | 2.997738  | -0.833933 | 1.755947  |
| H | 4.404634  | -1.013419 | 2.786182  |
| H | 2.805415  | -0.988066 | 3.517025  |
| H | 4.458239  | -4.346678 | 1.303427  |
| H | 5.385429  | -2.943249 | 1.850597  |
| H | 4.218110  | -2.783746 | 0.524705  |
| H | 2.909176  | -3.202729 | 4.654169  |
| H | 4.621448  | -3.044220 | 4.249397  |
| H | 3.778455  | -4.552511 | 3.895613  |
| H | -0.464483 | -1.775612 | -4.792079 |
| H | -0.325751 | -3.358349 | -5.570585 |
| H | 0.698888  | -2.967424 | -4.179019 |
| H | -0.104940 | -5.046772 | -2.817316 |
| H | -0.813877 | -5.410293 | -4.388668 |
| H | -1.829776 | -5.477448 | -2.948285 |
| H | -3.531489 | -3.842064 | -3.719940 |
| H | -2.694136 | -4.070768 | -5.256976 |
| H | -3.051907 | -2.439458 | -4.694180 |
| H | -1.060090 | 0.182634  | -3.365887 |
| H | -2.712962 | 0.798815  | -3.326644 |
| H | -2.341883 | -0.642922 | -4.267433 |
| H | -4.258350 | -1.905812 | -2.897796 |
| H | -4.502318 | -0.326264 | -2.151250 |
| H | -4.248594 | -1.743054 | -1.135349 |
| H | -2.289416 | -0.597666 | 0.093351  |
| H | -2.820581 | 0.788326  | -0.863419 |
| H | -1.117104 | 0.319323  | -0.851735 |
| C | -6.546174 | -0.226727 | 2.353593  |
| C | -6.907573 | -0.154231 | 3.709561  |
| C | -6.138261 | -0.808907 | 4.676438  |
| C | -4.996530 | -1.533672 | 4.326138  |
| C | -4.627369 | -1.642740 | 2.975843  |

|   |            |           |           |
|---|------------|-----------|-----------|
| C | -5.427688  | -0.996675 | 2.018563  |
| H | -7.759368  | 0.448053  | 4.013035  |
| H | -6.424105  | -0.736430 | 5.722525  |
| H | -4.404326  | -2.025313 | 5.093391  |
| H | -5.136755  | -1.062823 | 0.977141  |
| C | -8.403775  | 2.065067  | -0.787926 |
| C | -9.186832  | 1.545966  | 0.245898  |
| C | -8.615574  | 0.799640  | 1.279267  |
| C | -7.234890  | 0.546327  | 1.283898  |
| C | -6.470091  | 1.065550  | 0.229998  |
| C | -7.018873  | 1.835811  | -0.805601 |
| H | -8.863769  | 2.674647  | -1.560674 |
| H | -10.257382 | 1.732859  | 0.250321  |
| H | -9.243494  | 0.396263  | 2.068855  |
| H | -5.404900  | 0.870675  | 0.224724  |
| C | -5.553607  | 3.122570  | -4.091781 |
| C | -6.486917  | 2.626054  | -3.176484 |
| C | -6.112658  | 2.407274  | -1.839960 |
| C | -4.797279  | 2.714718  | -1.478299 |
| C | -3.833769  | 3.191893  | -2.382373 |
| C | -4.237559  | 3.397183  | -3.713439 |
| H | -5.855101  | 3.284831  | -5.123143 |
| H | -7.490924  | 2.378978  | -3.509443 |
| H | -4.504656  | 2.544818  | -0.452188 |
| H | -3.533487  | 3.779872  | -4.446894 |

172

**I** in the quintet state SCF = -4240.81170478

|    |           |           |           |
|----|-----------|-----------|-----------|
| Mo | 1.896535  | 2.172569  | 0.205006  |
| Mo | 0.669371  | -2.658461 | -0.304446 |
| I  | 4.459505  | 1.968502  | 1.463989  |
| I  | 2.611006  | -3.983182 | -1.952454 |
| P  | 2.718677  | 2.330165  | -2.171972 |
| P  | 0.858383  | 3.360690  | 2.195326  |
| P  | 1.588033  | -3.439062 | 1.831290  |
| P  | -1.220947 | -2.497116 | -2.024981 |

|   |           |           |           |
|---|-----------|-----------|-----------|
| N | 1.347722  | 0.285923  | 0.268363  |
| N | 1.043174  | -0.859680 | 0.101145  |
| N | 0.125084  | 3.056683  | -0.714563 |
| N | -1.067968 | -2.823248 | 0.931479  |
| C | 1.192548  | 3.099697  | -2.956455 |
| C | -0.047642 | 3.102914  | -2.086843 |
| C | -1.301569 | 3.221322  | -2.667337 |
| C | -2.463795 | 3.379037  | -1.882739 |
| C | -2.227292 | 3.548611  | -0.503529 |
| C | -0.985275 | 3.340854  | 0.050590  |
| C | -0.882689 | 3.305123  | 1.558409  |
| C | 4.079098  | 3.624577  | -2.572580 |
| C | 4.049841  | 4.134989  | -4.028956 |
| C | 3.844010  | 4.824543  | -1.629196 |
| C | 5.469054  | 3.031886  | -2.268555 |
| C | 3.047355  | 0.687952  | -3.082572 |
| C | 1.687100  | -0.018322 | -3.216510 |
| C | 3.657843  | 0.814915  | -4.488628 |
| C | 3.962642  | -0.167641 | -2.179326 |
| C | 1.253000  | 5.229393  | 2.358660  |
| C | 0.873033  | 5.892662  | 1.015450  |
| C | 0.477666  | 5.934321  | 3.484484  |
| C | 2.769831  | 5.407283  | 2.568929  |
| C | 0.690024  | 2.535935  | 3.911273  |
| C | -0.568509 | 2.949070  | 4.701385  |
| C | 1.954078  | 2.812382  | 4.747523  |
| C | 0.617703  | 1.021467  | 3.631384  |
| C | 0.358554  | -2.470413 | 2.894108  |
| C | -1.014729 | -2.530907 | 2.278641  |
| C | -2.174170 | -2.256910 | 3.002326  |
| C | -3.438219 | -2.368706 | 2.395635  |
| C | -3.459523 | -2.973787 | 1.125709  |
| C | -2.292277 | -3.180494 | 0.420058  |
| C | -2.278844 | -3.674277 | -0.985701 |
| C | 1.220546  | -5.300222 | 2.181036  |
| C | 2.452795  | -6.159157 | 1.830327  |

|   |           |           |           |
|---|-----------|-----------|-----------|
| C | 0.777532  | -5.557395 | 3.633991  |
| C | 0.078184  | -5.767416 | 1.248465  |
| C | 3.286112  | -2.972189 | 2.585054  |
| C | 3.334750  | -1.437085 | 2.707616  |
| C | 4.388798  | -3.384309 | 1.585846  |
| C | 3.564051  | -3.563275 | 3.979718  |
| C | -1.280849 | -3.407226 | -3.725108 |
| C | -0.208470 | -2.776076 | -4.636575 |
| C | -0.902498 | -4.888450 | -3.493662 |
| C | -2.650232 | -3.393226 | -4.429545 |
| C | -2.350711 | -0.920620 | -2.110084 |
| C | -2.019231 | -0.078738 | -3.356449 |
| C | -3.863454 | -1.228879 | -2.112259 |
| C | -2.049770 | -0.058600 | -0.863635 |
| H | 1.443800  | 4.150292  | -3.145107 |
| H | 0.978042  | 2.658421  | -3.934390 |
| H | -1.375945 | 3.142768  | -3.747404 |
| H | -3.045840 | 3.776281  | 0.169725  |
| H | -1.527566 | 4.074967  | 1.997728  |
| H | -1.274046 | 2.336495  | 1.893624  |
| H | 3.096794  | 4.604432  | -4.295288 |
| H | 4.256343  | 3.349142  | -4.756329 |
| H | 4.826330  | 4.902160  | -4.146013 |
| H | 5.738000  | 2.233678  | -2.965330 |
| H | 5.531641  | 2.642227  | -1.249306 |
| H | 6.222332  | 3.824145  | -2.371170 |
| H | 2.856792  | 5.280950  | -1.770255 |
| H | 4.595415  | 5.597633  | -1.838758 |
| H | 3.940146  | 4.533774  | -0.578924 |
| H | 1.114036  | -0.003201 | -2.287715 |
| H | 1.080589  | 0.422951  | -4.014948 |
| H | 1.858171  | -1.068373 | -3.467685 |
| H | 3.049111  | 1.444331  | -5.148850 |
| H | 3.703420  | -0.184745 | -4.939692 |
| H | 4.676597  | 1.210518  | -4.472128 |
| H | 4.137336  | -1.135535 | -2.663132 |

|   |           |           |           |
|---|-----------|-----------|-----------|
| H | 4.930493  | 0.305693  | -1.992876 |
| H | 3.493373  | -0.369598 | -1.213838 |
| H | 1.374945  | 5.412484  | 0.170041  |
| H | -0.205644 | 5.872381  | 0.827693  |
| H | 1.185286  | 6.944543  | 1.040848  |
| H | -0.605500 | 5.793025  | 3.395138  |
| H | 0.671460  | 7.013885  | 3.432460  |
| H | 0.790267  | 5.597331  | 4.476248  |
| H | 3.010088  | 6.478899  | 2.559247  |
| H | 3.113816  | 4.997756  | 3.521431  |
| H | 3.344935  | 4.915669  | 1.779496  |
| H | -1.492634 | 2.721998  | 4.159035  |
| H | -0.579183 | 4.007507  | 4.966782  |
| H | -0.596936 | 2.376865  | 5.638126  |
| H | 2.018330  | 3.856573  | 5.066967  |
| H | 1.923304  | 2.195744  | 5.655517  |
| H | 2.865998  | 2.556988  | 4.198562  |
| H | 0.553395  | 0.482158  | 4.586231  |
| H | 1.505617  | 0.681002  | 3.096577  |
| H | -0.258703 | 0.743383  | 3.034961  |
| H | 0.741919  | -1.449908 | 2.834878  |
| H | 0.326233  | -2.749390 | 3.953570  |
| H | -2.083097 | -1.884471 | 4.018964  |
| H | -4.405319 | -3.216868 | 0.653727  |
| H | -3.288649 | -3.820438 | -1.378014 |
| H | -1.761656 | -4.639679 | -1.029292 |
| H | 2.783690  | -5.981318 | 0.801363  |
| H | 2.181761  | -7.219890 | 1.915944  |
| H | 3.296047  | -5.985695 | 2.501644  |
| H | 1.520769  | -5.240946 | 4.368693  |
| H | 0.610178  | -6.633667 | 3.776740  |
| H | -0.166391 | -5.049124 | 3.860522  |
| H | -0.867503 | -5.262884 | 1.457513  |
| H | -0.081337 | -6.843911 | 1.398114  |
| H | 0.334125  | -5.623401 | 0.191362  |
| H | 3.016298  | -0.929781 | 1.796111  |

|   |           |           |           |
|---|-----------|-----------|-----------|
| H | 4.367297  | -1.123999 | 2.897787  |
| H | 2.732182  | -1.072124 | 3.544779  |
| H | 4.444134  | -4.461704 | 1.421389  |
| H | 5.360095  | -3.055668 | 1.978702  |
| H | 4.236066  | -2.909593 | 0.612744  |
| H | 2.785075  | -3.287904 | 4.700621  |
| H | 4.512447  | -3.155232 | 4.354214  |
| H | 3.659782  | -4.651737 | 3.975204  |
| H | -0.379376 | -1.710740 | -4.812800 |
| H | -0.219641 | -3.280269 | -5.612595 |
| H | 0.788370  | -2.901672 | -4.205673 |
| H | -0.007144 | -5.002946 | -2.878070 |
| H | -0.687689 | -5.351413 | -4.465471 |
| H | -1.723945 | -5.455560 | -3.042121 |
| H | -3.440521 | -3.814241 | -3.798402 |
| H | -2.589492 | -4.016245 | -5.332232 |
| H | -2.959965 | -2.395206 | -4.747161 |
| H | -0.968487 | 0.213519  | -3.377451 |
| H | -2.616852 | 0.839240  | -3.331185 |
| H | -2.254589 | -0.593184 | -4.290435 |
| H | -4.176069 | -1.858275 | -2.946996 |
| H | -4.413407 | -0.281620 | -2.191084 |
| H | -4.181842 | -1.707839 | -1.183095 |
| H | -2.228275 | -0.596196 | 0.070169  |
| H | -2.712629 | 0.813554  | -0.880219 |
| H | -1.020691 | 0.302459  | -0.847556 |
| C | -6.582914 | -0.299972 | 2.295755  |
| C | -6.962643 | -0.266964 | 3.648154  |
| C | -6.204209 | -0.946526 | 4.606411  |
| C | -5.055045 | -1.657176 | 4.251035  |
| C | -4.667675 | -1.726042 | 2.903371  |
| C | -5.457380 | -1.056729 | 1.954209  |
| H | -7.821100 | 0.323173  | 3.956756  |
| H | -6.504694 | -0.905263 | 5.650124  |
| H | -4.471233 | -2.168905 | 5.011576  |
| H | -5.153001 | -1.094302 | 0.915226  |

|   |            |          |           |
|---|------------|----------|-----------|
| C | -8.413416  | 2.036981 | -0.826880 |
| C | -9.206023  | 1.499620 | 0.190121  |
| C | -8.643156  | 0.740220 | 1.218567  |
| C | -7.261114  | 0.495421 | 1.236397  |
| C | -6.485454  | 1.038102 | 0.202289  |
| C | -7.026886  | 1.816624 | -0.830349 |
| H | -8.867114  | 2.652225 | -1.598880 |
| H | -10.277760 | 1.679784 | 0.183725  |
| H | -9.278593  | 0.318390 | 1.992382  |
| H | -5.418463  | 0.852439 | 0.206752  |
| C | -5.536893  | 3.078491 | -4.110327 |
| C | -6.476291  | 2.587389 | -3.198058 |
| C | -6.113546  | 2.395196 | -1.853822 |
| C | -4.808038  | 2.725706 | -1.477788 |
| C | -3.837366  | 3.199502 | -2.379314 |
| C | -4.230032  | 3.374313 | -3.720342 |
| H | -5.826653  | 3.219222 | -5.148323 |
| H | -7.473013  | 2.320862 | -3.537597 |
| H | -4.525858  | 2.573412 | -0.445068 |
| H | -3.521957  | 3.752282 | -4.452493 |

182

**H** in the closed-shell singlet state SCF = -4471.88459228

|    |           |           |           |
|----|-----------|-----------|-----------|
| Mo | -1.899360 | 2.348500  | -0.561784 |
| Mo | -1.554452 | -2.431602 | 0.612496  |
| I  | -4.147753 | 2.681386  | -2.346827 |
| I  | -3.683195 | -3.247868 | 2.336685  |
| P  | -2.955445 | 2.931622  | 1.543386  |
| P  | -0.273225 | 3.045522  | -2.374053 |
| P  | -2.687950 | -3.232494 | -1.388830 |
| P  | 0.323181  | -2.474681 | 2.326329  |
| N  | -1.674632 | 0.521217  | -0.200490 |
| N  | -1.576376 | -0.649212 | 0.087769  |
| N  | -0.137131 | 2.918071  | 0.590483  |
| N  | 0.094434  | -3.104393 | -0.617828 |
| C  | -1.508934 | 3.620677  | 2.517067  |

|   |           |           |           |
|---|-----------|-----------|-----------|
| C | -0.173689 | 3.241928  | 1.933955  |
| C | 0.962026  | 3.295170  | 2.721290  |
| C | 2.255924  | 3.111507  | 2.182680  |
| C | 2.282426  | 3.011916  | 0.782212  |
| C | 1.125363  | 2.877692  | 0.036266  |
| C | 1.259108  | 2.565867  | -1.431594 |
| C | -4.160407 | 4.435136  | 1.591694  |
| C | -4.268955 | 5.138035  | 2.962137  |
| C | -3.619323 | 5.466506  | 0.574713  |
| C | -5.564129 | 3.989374  | 1.138599  |
| C | -3.624221 | 1.507744  | 2.638220  |
| C | -2.403327 | 0.674992  | 3.086811  |
| C | -4.370822 | 1.949595  | 3.909072  |
| C | -4.556801 | 0.631930  | 1.774754  |
| C | -0.072929 | 4.916552  | -2.717571 |
| C | 0.211574  | 5.610670  | -1.365469 |
| C | 1.077651  | 5.244939  | -3.684917 |
| C | -1.399969 | 5.478187  | -3.268822 |
| C | -0.109171 | 2.011966  | -3.972359 |
| C | -1.047320 | 2.558061  | -5.065046 |
| C | -0.585519 | 0.596632  | -3.587569 |
| C | 1.331795  | 1.917589  | -4.512484 |
| C | -1.329612 | -2.729505 | -2.588475 |
| C | 0.024115  | -2.979725 | -1.983629 |
| C | 1.169698  | -3.047323 | -2.771544 |
| C | 2.425331  | -3.265367 | -2.185818 |
| C | 2.449018  | -3.555351 | -0.814160 |
| C | 1.284326  | -3.505658 | -0.065032 |
| C | 1.240765  | -3.845225 | 1.386313  |
| C | -2.744898 | -5.163408 | -1.494242 |
| C | -4.124209 | -5.683889 | -1.043468 |
| C | -2.403757 | -5.693647 | -2.899861 |
| C | -1.705120 | -5.742190 | -0.505000 |
| C | -4.261110 | -2.501533 | -2.198398 |
| C | -3.976780 | -1.015245 | -2.489746 |
| C | -5.413002 | -2.549388 | -1.171155 |



|   |           |           |           |
|---|-----------|-----------|-----------|
| C | -4.680763 | -3.174467 | -3.517389 |
| C | 0.200769  | -3.267435 | 4.080131  |
| C | -0.775603 | -2.413600 | 4.917805  |
| C | -0.405670 | -4.680922 | 3.923654  |
| C | 1.537698  | -3.423063 | 4.828419  |
| C | 1.660151  | -1.085641 | 2.351205  |
| C | 1.367050  | -0.120414 | 3.514269  |
| C | 3.115792  | -1.590238 | 2.453889  |
| C | 1.542482  | -0.302006 | 1.029065  |
| H | -1.580330 | 4.712532  | 2.439290  |
| H | -1.560486 | 3.386235  | 3.584332  |
| H | 0.822593  | 3.459636  | 3.783848  |
| H | 3.222191  | 2.940880  | 0.247212  |
| H | 2.187561  | 2.988463  | -1.832245 |
| H | 1.323934  | 1.476125  | -1.552345 |
| H | -3.303256 | 5.496922  | 3.333450  |
| H | -4.714535 | 4.506596  | 3.730716  |
| H | -4.915051 | 6.019066  | 2.850626  |
| H | -6.041058 | 3.335337  | 1.874252  |
| H | -5.536961 | 3.472249  | 0.175874  |
| H | -6.203883 | 4.875022  | 1.024836  |
| H | -2.605852 | 5.808026  | 0.820367  |
| H | -4.270430 | 6.351202  | 0.577698  |
| H | -3.613659 | 5.066708  | -0.442305 |
| H | -1.730533 | 0.436389  | 2.263779  |
| H | -1.828493 | 1.187924  | 3.866662  |
| H | -2.752670 | -0.275991 | 3.502500  |
| H | -3.768190 | 2.619155  | 4.533822  |
| H | -4.597006 | 1.058307  | 4.509208  |
| H | -5.321751 | 2.441247  | 3.688237  |
| H | -4.910197 | -0.217353 | 2.370821  |
| H | -5.429140 | 1.188292  | 1.418856  |
| H | -4.039707 | 0.226387  | 0.903134  |
| H | -0.563123 | 5.395228  | -0.622157 |
| H | 1.177038  | 5.320388  | -0.940726 |
| H | 0.230016  | 6.696322  | -1.525995 |

|   |           |           |           |
|---|-----------|-----------|-----------|
| H | 2.034417  | 4.829313  | -3.349172 |
| H | 1.197518  | 6.334914  | -3.743481 |
| H | 0.880610  | 4.885289  | -4.698305 |
| H | -1.303896 | 6.565853  | -3.386153 |
| H | -1.664692 | 5.060454  | -4.241802 |
| H | -2.237018 | 5.278646  | -2.594258 |
| H | -0.698897 | 3.513972  | -5.467383 |
| H | -2.070414 | 2.680415  | -4.695865 |
| H | -1.072648 | 1.844743  | -5.899718 |
| H | -1.625475 | 0.615600  | -3.253263 |
| H | -0.511072 | -0.060803 | -4.464685 |
| H | 0.021254  | 0.153080  | -2.789753 |
| H | 1.329325  | 1.289671  | -5.413464 |
| H | 2.013424  | 1.447972  | -3.795823 |
| H | 1.746244  | 2.888026  | -4.793304 |
| H | -1.477877 | -1.652347 | -2.688092 |
| H | -1.388397 | -3.159081 | -3.594871 |
| H | 1.089254  | -2.873778 | -3.840245 |
| H | 3.383613  | -3.818853 | -0.330183 |
| H | 2.236125  | -4.055437 | 1.785171  |
| H | 0.637207  | -4.749951 | 1.516475  |
| H | -4.388570 | -5.304436 | -0.051014 |
| H | -4.089279 | -6.780091 | -0.985332 |
| H | -4.921756 | -5.422406 | -1.741652 |
| H | -3.065433 | -5.301162 | -3.674693 |
| H | -2.498183 | -6.787993 | -2.907536 |
| H | -1.371136 | -5.455831 | -3.179762 |
| H | -0.679797 | -5.472113 | -0.769214 |
| H | -1.772424 | -6.838499 | -0.521195 |
| H | -1.905202 | -5.422777 | 0.525607  |
| H | -3.546164 | -0.490922 | -1.635562 |
| H | -4.917427 | -0.508271 | -2.730193 |
| H | -3.317046 | -0.874813 | -3.351476 |
| H | -5.704178 | -3.563343 | -0.892176 |
| H | -6.292497 | -2.057286 | -1.606878 |
| H | -5.146551 | -2.017900 | -0.253777 |

|   |           |           |           |
|---|-----------|-----------|-----------|
| H | -3.872602 | -3.159529 | -4.258287 |
| H | -5.524049 | -2.617077 | -3.946343 |
| H | -5.008428 | -4.208555 | -3.385471 |
| H | -0.411833 | -1.396068 | 5.079865  |
| H | -0.905576 | -2.879764 | 5.903971  |
| H | -1.757031 | -2.358813 | 4.441359  |
| H | -1.303612 | -4.684696 | 3.301332  |
| H | -0.699163 | -5.049624 | 4.914822  |
| H | 0.317711  | -5.396816 | 3.517199  |
| H | 2.260117  | -4.022252 | 4.262695  |
| H | 1.352814  | -3.949200 | 5.774665  |
| H | 2.003720  | -2.466888 | 5.076949  |
| H | 0.350910  | 0.279301  | 3.460275  |
| H | 2.058553  | 0.723278  | 3.459030  |
| H | 1.506377  | -0.587850 | 4.491326  |
| H | 3.297763  | -2.238064 | 3.312414  |
| H | 3.779383  | -0.720535 | 2.552843  |
| H | 3.419757  | -2.125094 | 1.547819  |
| H | 1.638155  | -0.947547 | 0.151791  |
| H | 2.351320  | 0.434987  | 0.993349  |
| H | 0.598035  | 0.235078  | 0.951817  |
| C | 5.927260  | -2.191548 | -3.145619 |
| C | 6.122697  | -2.963553 | -4.306623 |
| C | 5.114547  | -3.791613 | -4.797635 |
| C | 3.891471  | -3.888476 | -4.135216 |
| C | 3.688476  | -3.171041 | -2.948323 |
| C | 4.704668  | -2.328857 | -2.472173 |
| H | 7.075798  | -2.926765 | -4.824471 |
| H | 5.289824  | -4.375128 | -5.697344 |
| H | 3.108523  | -4.541464 | -4.510875 |
| H | 4.505873  | -1.732416 | -1.586671 |
| C | 8.911289  | 0.618079  | -1.832963 |
| C | 8.824824  | 0.253673  | -3.173991 |
| C | 7.853714  | -0.650798 | -3.595683 |
| C | 6.962032  | -1.230923 | -2.676049 |
| C | 7.065788  | -0.853395 | -1.325108 |

|   |           |           |           |
|---|-----------|-----------|-----------|
| C | 8.021389  | 0.076700  | -0.889944 |
| H | 9.643170  | 1.354949  | -1.515620 |
| H | 9.500099  | 0.697760  | -3.900409 |
| H | 7.767885  | -0.882764 | -4.652329 |
| H | 6.413211  | -1.309777 | -0.586310 |
| C | 4.520761  | 2.582797  | 5.177972  |
| C | 5.668878  | 2.068670  | 4.576127  |
| C | 5.749862  | 1.982299  | 3.174057  |
| C | 4.641483  | 2.392449  | 2.423754  |
| C | 3.451512  | 2.873119  | 3.008621  |
| C | 3.427810  | 2.984283  | 4.414951  |
| H | 4.470713  | 2.656031  | 6.261226  |
| H | 6.487797  | 1.715912  | 5.194792  |
| H | 4.710617  | 2.328914  | 1.345707  |
| H | 2.548305  | 3.368085  | 4.920788  |
| C | 8.241829  | 1.659584  | 3.090953  |
| C | 6.980273  | 1.491710  | 2.493901  |
| C | 6.930276  | 0.905608  | 1.216675  |
| C | 8.092101  | 0.542163  | 0.520970  |
| C | 9.334961  | 0.710110  | 1.153370  |
| C | 9.402158  | 1.255476  | 2.433426  |
| H | 8.320185  | 2.142256  | 4.059937  |
| H | 5.970273  | 0.756146  | 0.731693  |
| H | 10.243353 | 0.406952  | 0.640698  |
| H | 10.367453 | 1.386702  | 2.915074  |

182

**H** in the triplet state SCF = -4471.89486556

|    |           |           |           |
|----|-----------|-----------|-----------|
| Mo | -1.848469 | 2.448655  | -0.557856 |
| Mo | -1.571005 | -2.370522 | 0.590127  |
| I  | -4.129821 | 2.777927  | -2.282753 |
| I  | -3.633302 | -3.338506 | 2.370095  |
| P  | -2.949610 | 2.928754  | 1.604704  |
| P  | -0.216552 | 2.950305  | -2.348502 |
| P  | -2.782659 | -3.168799 | -1.391979 |
| P  | 0.374874  | -2.507058 | 2.247628  |

|   |           |           |           |
|---|-----------|-----------|-----------|
| N | -1.562001 | 0.589337  | -0.297365 |
| N | -1.493112 | -0.574940 | -0.012235 |
| N | -0.092788 | 2.982469  | 0.629927  |
| N | 0.027692  | -2.998368 | -0.697905 |
| C | -1.493174 | 3.686946  | 2.534698  |
| C | -0.153504 | 3.299714  | 1.968822  |
| C | 0.974839  | 3.311185  | 2.776685  |
| C | 2.265179  | 3.103013  | 2.249706  |
| C | 2.315954  | 2.997694  | 0.851223  |
| C | 1.166996  | 2.881686  | 0.089274  |
| C | 1.311001  | 2.523053  | -1.365219 |
| C | -4.208872 | 4.377161  | 1.720609  |
| C | -4.303445 | 5.047755  | 3.107419  |
| C | -3.742321 | 5.446611  | 0.705593  |
| C | -5.603005 | 3.874247  | 1.296950  |
| C | -3.501552 | 1.459267  | 2.692233  |
| C | -2.220333 | 0.690057  | 3.075621  |
| C | -4.235378 | 1.824962  | 3.993685  |
| C | -4.407440 | 0.562987  | 1.822587  |
| C | -0.002140 | 4.819511  | -2.744702 |
| C | 0.236219  | 5.564686  | -1.410909 |
| C | 1.183998  | 5.120882  | -3.677910 |
| C | -1.303585 | 5.372912  | -3.361447 |
| C | 0.030682  | 1.901012  | -3.930541 |
| C | -0.872867 | 2.427491  | -5.061763 |
| C | -0.462050 | 0.493600  | -3.548782 |
| C | 1.489055  | 1.793215  | -4.418470 |
| C | -1.468657 | -2.609217 | -2.612473 |
| C | -0.091226 | -2.863956 | -2.063111 |
| C | 1.024115  | -2.912483 | -2.894819 |
| C | 2.303080  | -3.129460 | -2.363205 |
| C | 2.369727  | -3.468599 | -1.001697 |
| C | 1.235610  | -3.438100 | -0.211274 |
| C | 1.243375  | -3.834087 | 1.227097  |
| C | -2.820214 | -5.091916 | -1.558311 |
| C | -4.180085 | -5.647241 | -1.091772 |

|   |           |           |           |
|---|-----------|-----------|-----------|
| C | -2.516584 | -5.564047 | -2.993810 |
| C | -1.742315 | -5.690777 | -0.624046 |
| C | -4.387696 | -2.416230 | -2.110502 |
| C | -4.133933 | -0.908285 | -2.303823 |
| C | -5.519571 | -2.551674 | -1.068796 |
| C | -4.820416 | -3.014270 | -3.460832 |
| C | 0.302683  | -3.360033 | 3.976140  |
| C | -0.648620 | -2.534085 | 4.868292  |
| C | -0.304290 | -4.769887 | 3.792420  |
| C | 1.659867  | -3.539813 | 4.681849  |
| C | 1.719473  | -1.126062 | 2.292150  |
| C | 1.472900  | -0.199525 | 3.496345  |
| C | 3.172894  | -1.648396 | 2.333846  |
| C | 1.577874  | -0.294890 | 1.002551  |
| H | -1.590821 | 4.771314  | 2.402909  |
| H | -1.535131 | 3.504188  | 3.612867  |
| H | 0.825831  | 3.452444  | 3.841098  |
| H | 3.261685  | 2.900402  | 0.332812  |
| H | 2.247535  | 2.925335  | -1.767963 |
| H | 1.373986  | 1.429402  | -1.436824 |
| H | -3.344757 | 5.455917  | 3.445086  |
| H | -4.676716 | 4.375354  | 3.880107  |
| H | -5.004558 | 5.890529  | 3.042570  |
| H | -6.036034 | 3.199209  | 2.041012  |
| H | -5.573885 | 3.360268  | 0.332137  |
| H | -6.281560 | 4.732334  | 1.199364  |
| H | -2.732794 | 5.820828  | 0.920608  |
| H | -4.420371 | 6.309204  | 0.753478  |
| H | -3.763263 | 5.070307  | -0.320378 |
| H | -1.566577 | 0.520288  | 2.220553  |
| H | -1.649234 | 1.220743  | 3.846376  |
| H | -2.494721 | -0.291665 | 3.477071  |
| H | -3.645901 | 2.497671  | 4.627664  |
| H | -4.409933 | 0.904036  | 4.565524  |
| H | -5.210153 | 2.284386  | 3.810493  |
| H | -4.700922 | -0.323882 | 2.394520  |

|   |           |           |           |
|---|-----------|-----------|-----------|
| H | -5.315363 | 1.083883  | 1.504740  |
| H | -3.889319 | 0.219398  | 0.925434  |
| H | -0.571397 | 5.393404  | -0.691318 |
| H | 1.178527  | 5.280267  | -0.933249 |
| H | 0.278083  | 6.642911  | -1.612414 |
| H | 2.129354  | 4.723953  | -3.291075 |
| H | 1.300895  | 6.208943  | -3.771911 |
| H | 1.029844  | 4.723935  | -4.684397 |
| H | -1.196380 | 6.456262  | -3.508162 |
| H | -1.536123 | 4.928659  | -4.330785 |
| H | -2.167468 | 5.198895  | -2.713976 |
| H | -0.517717 | 3.378344  | -5.469266 |
| H | -1.907292 | 2.552913  | -4.724371 |
| H | -0.872962 | 1.701478  | -5.885958 |
| H | -1.514710 | 0.522670  | -3.258960 |
| H | -0.351611 | -0.177389 | -4.411750 |
| H | 0.105206  | 0.057672  | -2.719484 |
| H | 1.516621  | 1.155936  | -5.312704 |
| H | 2.140237  | 1.323801  | -3.673428 |
| H | 1.922857  | 2.756896  | -4.692871 |
| H | -1.637982 | -1.533461 | -2.668792 |
| H | -1.561328 | -3.007383 | -3.628831 |
| H | 0.899818  | -2.712658 | -3.954916 |
| H | 3.318187  | -3.755320 | -0.559044 |
| H | 2.249723  | -4.073734 | 1.579371  |
| H | 0.628164  | -4.734424 | 1.338105  |
| H | -4.428335 | -5.302015 | -0.082908 |
| H | -4.125974 | -6.743828 | -1.067497 |
| H | -4.996238 | -5.378576 | -1.766046 |
| H | -3.204884 | -5.149844 | -3.734056 |
| H | -2.602773 | -6.658074 | -3.038686 |
| H | -1.494840 | -5.306747 | -3.294562 |
| H | -0.730786 | -5.387571 | -0.905598 |
| H | -1.789739 | -6.786416 | -0.687901 |
| H | -1.917067 | -5.416288 | 0.422669  |
| H | -3.708399 | -0.438135 | -1.416140 |

|   |           |           |           |
|---|-----------|-----------|-----------|
| H | -5.085591 | -0.405225 | -2.507053 |
| H | -3.479862 | -0.691239 | -3.153426 |
| H | -5.798061 | -3.586004 | -0.862173 |
| H | -6.410492 | -2.037753 | -1.453154 |
| H | -5.242700 | -2.086343 | -0.119050 |
| H | -4.027499 | -2.938598 | -4.214140 |
| H | -5.683440 | -2.450544 | -3.839019 |
| H | -5.123616 | -4.061639 | -3.383279 |
| H | -0.274103 | -1.525426 | 5.060342  |
| H | -0.759301 | -3.036001 | 5.839057  |
| H | -1.640375 | -2.456557 | 4.416790  |
| H | -1.221152 | -4.757223 | 3.199675  |
| H | -0.562734 | -5.172512 | 4.780203  |
| H | 0.408360  | -5.467261 | 3.337941  |
| H | 2.364556  | -4.123759 | 4.078996  |
| H | 1.498698  | -4.094274 | 5.616190  |
| H | 2.135466  | -2.592985 | 4.946992  |
| H | 0.456709  | 0.202892  | 3.492977  |
| H | 2.165521  | 0.643846  | 3.446524  |
| H | 1.644115  | -0.699339 | 4.451924  |
| H | 3.372431  | -2.334431 | 3.157665  |
| H | 3.847272  | -0.789493 | 2.453299  |
| H | 3.446387  | -2.145789 | 1.397453  |
| H | 1.623013  | -0.911168 | 0.101542  |
| H | 2.406146  | 0.420538  | 0.963088  |
| H | 0.646599  | 0.269032  | 0.977025  |
| C | 5.798968  | -2.018328 | -3.292121 |
| C | 5.963016  | -2.680947 | -4.523778 |
| C | 4.931290  | -3.441089 | -5.073023 |
| C | 3.718341  | -3.584665 | -4.400688 |
| C | 3.544419  | -2.979388 | -3.147987 |
| C | 4.582551  | -2.196245 | -2.618302 |
| H | 6.908460  | -2.615559 | -5.052530 |
| H | 5.082493  | -3.939486 | -6.026778 |
| H | 2.921324  | -4.191956 | -4.820896 |
| H | 4.404648  | -1.679301 | -1.680190 |



|   |           |           |           |
|---|-----------|-----------|-----------|
| C | 8.870953  | 0.574254  | -1.745384 |
| C | 8.790134  | 0.308908  | -3.109767 |
| C | 7.789284  | -0.521777 | -3.606822 |
| C | 6.860707  | -1.130427 | -2.743621 |
| C | 6.958792  | -0.851474 | -1.367624 |
| C | 7.943270  | 0.006441  | -0.855985 |
| H | 9.627846  | 1.254820  | -1.366617 |
| H | 9.494454  | 0.773750  | -3.794430 |
| H | 7.712394  | -0.673955 | -4.678382 |
| H | 6.277771  | -1.330117 | -0.669853 |
| C | 4.494714  | 2.502884  | 5.259874  |
| C | 5.616444  | 1.928469  | 4.663267  |
| C | 5.704519  | 1.834866  | 3.262356  |
| C | 4.617111  | 2.295209  | 2.509705  |
| C | 3.451618  | 2.832471  | 3.089045  |
| C | 3.425161  | 2.956341  | 4.491486  |
| H | 4.446126  | 2.582647  | 6.342514  |
| H | 6.411989  | 1.538081  | 5.289552  |
| H | 4.682915  | 2.220569  | 1.433114  |
| H | 2.564182  | 3.387984  | 4.990680  |
| C | 8.172062  | 1.349502  | 3.211275  |
| C | 6.915126  | 1.291116  | 2.584373  |
| C | 6.857013  | 0.771784  | 1.278071  |
| C | 8.009359  | 0.377065  | 0.583691  |
| C | 9.246096  | 0.434519  | 1.246623  |
| C | 9.318807  | 0.906203  | 2.555244  |
| H | 8.263063  | 1.778641  | 4.203860  |
| H | 5.902589  | 0.703337  | 0.764975  |
| H | 10.145319 | 0.106511  | 0.733181  |
| H | 10.279548 | 0.952095  | 3.060942  |

182

**H** in the quintet state SCF = -4471.88668785

|    |           |           |           |
|----|-----------|-----------|-----------|
| Mo | -1.691686 | 2.497664  | -0.524769 |
| Mo | -1.706618 | -2.387010 | 0.568300  |
| I  | -3.900914 | 2.781074  | -2.318278 |

|   |           |           |           |
|---|-----------|-----------|-----------|
| I | -3.828648 | -3.180482 | 2.358366  |
| P | -2.851792 | 3.057791  | 1.651170  |
| P | -0.003003 | 3.031464  | -2.347830 |
| P | -2.897306 | -3.128568 | -1.439417 |
| P | 0.231469  | -2.526521 | 2.226432  |
| N | -1.654259 | 0.562581  | -0.340266 |
| N | -1.638867 | -0.592180 | -0.031864 |
| N | 0.043183  | 3.102311  | 0.649815  |
| N | -0.086113 | -2.984456 | -0.722616 |
| C | -1.376001 | 3.768131  | 2.563144  |
| C | -0.035659 | 3.339421  | 2.016682  |
| C | 1.066241  | 3.272499  | 2.844610  |
| C | 2.370734  | 3.032525  | 2.342971  |
| C | 2.445192  | 2.990623  | 0.931046  |
| C | 1.321344  | 2.967974  | 0.139856  |
| C | 1.488693  | 2.629169  | -1.322965 |
| C | -4.073088 | 4.533899  | 1.672765  |
| C | -4.175261 | 5.232916  | 3.045229  |
| C | -3.561642 | 5.565166  | 0.641106  |
| C | -5.470996 | 4.054250  | 1.234659  |
| C | -3.482401 | 1.609727  | 2.715535  |
| C | -2.237856 | 0.774843  | 3.079940  |
| C | -4.192359 | 2.008606  | 4.020189  |
| C | -4.431460 | 0.759455  | 1.843467  |
| C | 0.201268  | 4.884695  | -2.791527 |
| C | 0.470929  | 5.651743  | -1.476739 |
| C | 1.369953  | 5.156368  | -3.755608 |
| C | -1.117236 | 5.418680  | -3.387226 |
| C | 0.218685  | 1.920038  | -3.885161 |
| C | -0.655881 | 2.431845  | -5.046294 |
| C | -0.306678 | 0.531993  | -3.471752 |
| C | 1.683014  | 1.778966  | -4.347448 |
| C | -1.564664 | -2.552209 | -2.639211 |
| C | -0.194170 | -2.830877 | -2.085747 |
| C | 0.925686  | -2.886159 | -2.911419 |
| C | 2.198096  | -3.125905 | -2.374486 |

|   |           |           |           |
|---|-----------|-----------|-----------|
| C | 2.252247  | -3.477540 | -1.015775 |
| C | 1.112705  | -3.441964 | -0.232570 |
| C | 1.104487  | -3.851594 | 1.201354  |
| C | -2.938254 | -5.048098 | -1.625770 |
| C | -4.307193 | -5.599286 | -1.182265 |
| C | -2.611368 | -5.513747 | -3.057531 |
| C | -1.879543 | -5.653326 | -0.673500 |
| C | -4.488493 | -2.363339 | -2.178741 |
| C | -4.227771 | -0.853398 | -2.342755 |
| C | -5.639860 | -2.509258 | -1.160178 |
| C | -4.896027 | -2.941933 | -3.545221 |
| C | 0.139657  | -3.400814 | 3.942412  |
| C | -0.780219 | -2.561282 | 4.854773  |
| C | -0.516832 | -4.785842 | 3.740776  |
| C | 1.496042  | -3.632993 | 4.634328  |
| C | 1.586605  | -1.157946 | 2.293419  |
| C | 1.364377  | -0.258871 | 3.521604  |
| C | 3.036346  | -1.691981 | 2.310254  |
| C | 1.434873  | -0.294909 | 1.024696  |
| H | -1.445115 | 4.854814  | 2.426867  |
| H | -1.438472 | 3.584818  | 3.640018  |
| H | 0.899617  | 3.397600  | 3.908977  |
| H | 3.397481  | 2.869104  | 0.429131  |
| H | 2.415782  | 3.061924  | -1.714517 |
| H | 1.586669  | 1.537729  | -1.399978 |
| H | -3.214288 | 5.632713  | 3.386015  |
| H | -4.568739 | 4.580881  | 3.825598  |
| H | -4.861711 | 6.084555  | 2.952484  |
| H | -5.935637 | 3.409713  | 1.986177  |
| H | -5.438377 | 3.517135  | 0.282267  |
| H | -6.122475 | 4.928162  | 1.103792  |
| H | -2.548964 | 5.921136  | 0.866791  |
| H | -4.225002 | 6.440304  | 0.655664  |
| H | -3.564480 | 5.158282  | -0.373187 |
| H | -1.610060 | 0.569838  | 2.212145  |
| H | -1.626799 | 1.273043  | 3.841087  |

|   |           |           |           |
|---|-----------|-----------|-----------|
| H | -2.558317 | -0.192681 | 3.481434  |
| H | -3.572941 | 2.658308  | 4.649989  |
| H | -4.402915 | 1.097549  | 4.595048  |
| H | -5.148466 | 2.507517  | 3.839649  |
| H | -4.736490 | -0.129311 | 2.405993  |
| H | -5.333280 | 1.308011  | 1.557039  |
| H | -3.941420 | 0.412614  | 0.931394  |
| H | -0.315376 | 5.480062  | -0.734572 |
| H | 1.429406  | 5.381940  | -1.022585 |
| H | 0.498210  | 6.726251  | -1.698360 |
| H | 2.322421  | 4.776133  | -3.368979 |
| H | 1.481724  | 6.240898  | -3.885954 |
| H | 1.202988  | 4.726521  | -4.746534 |
| H | -1.017788 | 6.498225  | -3.562640 |
| H | -1.373920 | 4.950161  | -4.339419 |
| H | -1.958706 | 5.255836  | -2.707715 |
| H | -0.284898 | 3.370665  | -5.466417 |
| H | -1.696597 | 2.571894  | -4.736971 |
| H | -0.642998 | 1.687043  | -5.852885 |
| H | -1.366349 | 0.581741  | -3.210088 |
| H | -0.183311 | -0.163465 | -4.312852 |
| H | 0.230435  | 0.110328  | -2.616003 |
| H | 1.712846  | 1.121568  | -5.226306 |
| H | 2.315921  | 1.316847  | -3.582731 |
| H | 2.133860  | 2.730703  | -4.636173 |
| H | -1.723920 | -1.473123 | -2.671917 |
| H | -1.653903 | -2.927171 | -3.664981 |
| H | 0.811006  | -2.675093 | -3.970367 |
| H | 3.194012  | -3.780382 | -0.569750 |
| H | 2.106302  | -4.098045 | 1.561158  |
| H | 0.485422  | -4.750785 | 1.299356  |
| H | -4.568840 | -5.255509 | -0.175872 |
| H | -4.259895 | -6.696257 | -1.160702 |
| H | -5.111692 | -5.323324 | -1.867405 |
| H | -3.291686 | -5.099206 | -3.805026 |
| H | -2.690267 | -6.608087 | -3.109429 |

|   |           |           |           |
|---|-----------|-----------|-----------|
| H | -1.587236 | -5.247862 | -3.342347 |
| H | -0.861254 | -5.359523 | -0.939520 |
| H | -1.934865 | -6.748891 | -0.732229 |
| H | -2.068696 | -5.374742 | 0.370657  |
| H | -3.834784 | -0.397823 | -1.432797 |
| H | -5.171773 | -0.347748 | -2.575266 |
| H | -3.541715 | -0.621156 | -3.162703 |
| H | -5.933830 | -3.544526 | -0.981966 |
| H | -6.518879 | -1.977196 | -1.547694 |
| H | -5.372963 | -2.069107 | -0.195437 |
| H | -4.088854 | -2.857970 | -4.282489 |
| H | -5.751376 | -2.372710 | -3.932867 |
| H | -5.201941 | -3.989993 | -3.487440 |
| H | -0.368880 | -1.572351 | 5.070484  |
| H | -0.908288 | -3.081554 | 5.813712  |
| H | -1.769178 | -2.437639 | 4.407032  |
| H | -1.444086 | -4.729646 | 3.165933  |
| H | -0.770778 | -5.200752 | 4.724710  |
| H | 0.162631  | -5.497826 | 3.259079  |
| H | 2.177632  | -4.229525 | 4.017310  |
| H | 1.326728  | -4.194620 | 5.563031  |
| H | 2.001983  | -2.703996 | 4.906342  |
| H | 0.346435  | 0.136006  | 3.554094  |
| H | 2.048638  | 0.590075  | 3.469164  |
| H | 1.566212  | -0.776904 | 4.461470  |
| H | 3.233978  | -2.402325 | 3.114410  |
| H | 3.717822  | -0.842228 | 2.450270  |
| H | 3.300553  | -2.165802 | 1.359153  |
| H | 1.453349  | -0.891762 | 0.109579  |
| H | 2.271264  | 0.410613  | 0.987352  |
| H | 0.511035  | 0.282696  | 1.027561  |
| C | 5.723747  | -2.088775 | -3.284118 |
| C | 5.870028  | -2.734311 | -4.526983 |
| C | 4.818885  | -3.458117 | -5.088328 |
| C | 3.603065  | -3.581795 | -4.417402 |
| C | 3.444462  | -2.992472 | -3.154899 |

|   |           |           |           |
|---|-----------|-----------|-----------|
| C | 4.502500  | -2.245030 | -2.612990 |
| H | 6.817119  | -2.684913 | -5.054519 |
| H | 4.957012  | -3.944654 | -6.050186 |
| H | 2.791154  | -4.162548 | -4.846567 |
| H | 4.339116  | -1.739898 | -1.665801 |
| C | 8.874523  | 0.376759  | -1.688409 |
| C | 8.783180  | 0.144658  | -3.058348 |
| C | 7.756563  | -0.643725 | -3.571830 |
| C | 6.811361  | -1.242843 | -2.719975 |
| C | 6.920120  | -0.997356 | -1.338661 |
| C | 7.931153  | -0.181556 | -0.809796 |
| H | 9.653223  | 1.024036  | -1.295625 |
| H | 9.500579  | 0.602591  | -3.734098 |
| H | 7.673696  | -0.770036 | -4.646381 |
| H | 6.226142  | -1.470296 | -0.649900 |
| C | 4.477764  | 2.120369  | 5.358256  |
| C | 5.603539  | 1.559161  | 4.753298  |
| C | 5.729252  | 1.578359  | 3.351649  |
| C | 4.689576  | 2.142015  | 2.604917  |
| C | 3.512343  | 2.661233  | 3.186678  |
| C | 3.447265  | 2.665313  | 4.598022  |
| H | 4.393342  | 2.112887  | 6.441887  |
| H | 6.366158  | 1.089345  | 5.366142  |
| H | 4.801471  | 2.164443  | 1.529492  |
| H | 2.578664  | 3.070714  | 5.106368  |
| C | 8.185384  | 1.030828  | 3.298234  |
| C | 6.931533  | 1.032144  | 2.663275  |
| C | 6.864452  | 0.559051  | 1.340327  |
| C | 8.007330  | 0.151494  | 0.638273  |
| C | 9.242640  | 0.153206  | 1.306362  |
| C | 9.322459  | 0.578545  | 2.630789  |
| H | 8.279454  | 1.420094  | 4.307156  |
| H | 5.908766  | 0.536710  | 0.825096  |
| H | 10.134361 | -0.184708 | 0.786094  |
| H | 10.281960 | 0.579263  | 3.141096  |

**III** in the triplet state SCF = -4240.75738213

|    |            |           |           |
|----|------------|-----------|-----------|
| Mo | -9.435567  | -0.584392 | 0.601845  |
| Mo | 9.473598   | -0.160782 | 0.278209  |
| I  | -11.353202 | -2.211790 | 1.923017  |
| I  | 11.965230  | -0.106776 | 1.662926  |
| P  | -9.716875  | 1.567154  | 1.875870  |
| P  | -8.565860  | -2.221797 | -1.100436 |
| P  | 8.769500   | 2.072776  | 0.956747  |
| P  | 9.258763   | -2.572636 | -0.172353 |
| N  | 9.927597   | 0.860041  | -2.601978 |
| N  | 9.762302   | 0.481075  | -1.536215 |
| N  | -7.981927  | 0.643022  | -0.402434 |
| N  | 7.296119   | -0.289174 | -0.087616 |
| C  | -9.091012  | 2.673751  | 0.495108  |
| C  | -7.989029  | 2.034629  | -0.311271 |
| C  | -7.048112  | 2.830114  | -0.928353 |
| C  | -6.007972  | 2.292666  | -1.721110 |
| C  | -6.018938  | 0.882242  | -1.824026 |
| C  | -6.960524  | 0.105329  | -1.184255 |
| C  | -6.892238  | -1.396497 | -1.302499 |
| C  | -11.453957 | 2.272078  | 2.221905  |
| C  | -11.511589 | 3.811750  | 2.262572  |
| C  | -12.356008 | 1.773147  | 1.068281  |
| C  | -11.994920 | 1.683730  | 3.540024  |
| C  | -8.519873  | 1.809975  | 3.339170  |
| C  | -7.085074  | 1.650169  | 2.787284  |
| C  | -8.634843  | 3.183799  | 4.020214  |
| C  | -8.773867  | 0.684811  | 4.365277  |
| C  | -9.405005  | -2.140198 | -2.809850 |
| C  | -9.293410  | -0.680225 | -3.305476 |
| C  | -8.771256  | -3.065363 | -3.862112 |
| C  | -10.900618 | -2.479268 | -2.633614 |
| C  | -8.094478  | -4.001780 | -0.601071 |
| C  | -6.926940  | -4.593020 | -1.416115 |
| C  | -9.331892  | -4.914825 | -0.707677 |

|   |            |           |           |
|---|------------|-----------|-----------|
| C | -7.674424  | -3.932245 | 0.885952  |
| C | 7.288861   | 2.174865  | -0.207083 |
| C | 6.565186   | 0.857872  | -0.275480 |
| C | 5.197090   | 0.821979  | -0.520878 |
| C | 4.510557   | -0.398071 | -0.597982 |
| C | 5.270660   | -1.558405 | -0.400190 |
| C | 6.634643   | -1.486303 | -0.138205 |
| C | 7.406257   | -2.748560 | 0.143700  |
| C | 7.967251   | 2.063821  | 2.714347  |
| C | 8.969782   | 2.577236  | 3.765936  |
| C | 6.650373   | 2.856766  | 2.803178  |
| C | 7.663840   | 0.586413  | 3.063663  |
| C | 9.633571   | 3.761510  | 0.645982  |
| C | 9.942371   | 3.848708  | -0.865386 |
| C | 10.991050  | 3.783640  | 1.380685  |
| C | 8.787750   | 4.982643  | 1.047781  |
| C | 9.920745   | -3.901711 | 1.051148  |
| C | 11.419606  | -4.119714 | 0.769030  |
| C | 9.772734   | -3.302385 | 2.469195  |
| C | 9.177989   | -5.253296 | 1.036322  |
| C | 9.444419   | -3.169085 | -1.989700 |
| C | 10.846016  | -2.746218 | -2.477171 |
| C | 9.257574   | -4.677884 | -2.223246 |
| C | 8.376756   | -2.425895 | -2.825024 |
| H | -9.972057  | 2.824004  | -0.143339 |
| H | -8.788183  | 3.664460  | 0.850762  |
| H | -7.105521  | 3.901900  | -0.764991 |
| H | -5.283961  | 0.378679  | -2.444699 |
| H | -6.384089  | -1.691428 | -2.227019 |
| H | -6.297553  | -1.800938 | -0.472532 |
| H | -11.189254 | 4.262480  | 1.318006  |
| H | -10.908226 | 4.237765  | 3.066422  |
| H | -12.550620 | 4.123768  | 2.431049  |
| H | -11.474781 | 2.084135  | 4.415710  |
| H | -11.922083 | 0.591022  | 3.552462  |
| H | -13.054944 | 1.949499  | 3.641886  |



|   |            |           |           |
|---|------------|-----------|-----------|
| H | -12.012324 | 2.119768  | 0.086251  |
| H | -13.369933 | 2.167847  | 1.214190  |
| H | -12.419245 | 0.680903  | 1.047086  |
| H | -6.951113  | 0.696243  | 2.266478  |
| H | -6.812176  | 2.450766  | 2.093404  |
| H | -6.379491  | 1.679944  | 3.627442  |
| H | -8.505178  | 4.008152  | 3.309950  |
| H | -7.846502  | 3.277025  | 4.778712  |
| H | -9.593220  | 3.313181  | 4.530085  |
| H | -8.027868  | 0.754559  | 5.167975  |
| H | -9.763214  | 0.750350  | 4.823833  |
| H | -8.689277  | -0.305249 | 3.904398  |
| H | -9.705271  | 0.030320  | -2.581215 |
| H | -8.259783  | -0.386158 | -3.510994 |
| H | -9.862026  | -0.581222 | -4.238944 |
| H | -7.697834  | -2.878917 | -3.980594 |
| H | -9.245571  | -2.882384 | -4.835211 |
| H | -8.914722  | -4.122776 | -3.624201 |
| H | -11.415286 | -2.348701 | -3.594791 |
| H | -11.063319 | -3.509072 | -2.307307 |
| H | -11.377724 | -1.821651 | -1.898840 |
| H | -6.010334  | -4.002784 | -1.312611 |
| H | -7.154652  | -4.684241 | -2.479878 |
| H | -6.706444  | -5.600662 | -1.039991 |
| H | -9.621896  | -5.096584 | -1.746905 |
| H | -9.095464  | -5.889027 | -0.260708 |
| H | -10.189615 | -4.499702 | -0.167704 |
| H | -7.376258  | -4.935033 | 1.219035  |
| H | -8.497201  | -3.595217 | 1.523566  |
| H | -6.816322  | -3.268872 | 1.048563  |
| H | 7.738752   | 2.367487  | -1.187167 |
| H | 6.585490   | 2.989666  | -0.007024 |
| H | 4.659816   | 1.757838  | -0.631752 |
| H | 4.801507   | -2.534331 | -0.467760 |
| H | 6.951610   | -3.598113 | -0.377384 |
| H | 7.317269   | -2.961809 | 1.215660  |

|   |           |           |           |
|---|-----------|-----------|-----------|
| H | 9.929608  | 2.053719  | 3.696214  |
| H | 8.561299  | 2.396514  | 4.769234  |
| H | 9.150533  | 3.651425  | 3.679567  |
| H | 6.770375  | 3.907597  | 2.528925  |
| H | 6.275143  | 2.825787  | 3.835174  |
| H | 5.873210  | 2.422944  | 2.164118  |
| H | 6.912612  | 0.144806  | 2.403606  |
| H | 7.273627  | 0.530567  | 4.089132  |
| H | 8.572231  | -0.032101 | 3.035410  |
| H | 10.509292 | 2.983973  | -1.216414 |
| H | 10.552599 | 4.743129  | -1.045373 |
| H | 9.042721  | 3.948046  | -1.481257 |
| H | 10.890650 | 3.790644  | 2.466643  |
| H | 11.530553 | 4.697299  | 1.096459  |
| H | 11.607858 | 2.922923  | 1.108604  |
| H | 7.811089  | 4.990672  | 0.550052  |
| H | 9.312888  | 5.900363  | 0.750322  |
| H | 8.623583  | 5.039968  | 2.127145  |
| H | 11.585230 | -4.628812 | -0.185612 |
| H | 11.850895 | -4.752673 | 1.556005  |
| H | 11.967797 | -3.172151 | 0.764487  |
| H | 10.336531 | -2.374260 | 2.581677  |
| H | 10.164535 | -4.019878 | 3.202218  |
| H | 8.725851  | -3.112150 | 2.739026  |
| H | 8.105197  | -5.142539 | 1.229312  |
| H | 9.583577  | -5.887000 | 1.836464  |
| H | 9.299513  | -5.799327 | 0.101068  |
| H | 11.003258 | -1.671054 | -2.368455 |
| H | 10.953174 | -3.000598 | -3.540257 |
| H | 11.643235 | -3.258367 | -1.930692 |
| H | 10.058859 | -5.269695 | -1.772913 |
| H | 9.276062  | -4.877010 | -3.303363 |
| H | 8.298070  | -5.044006 | -1.841145 |
| H | 7.362204  | -2.770168 | -2.594915 |
| H | 8.556123  | -2.628105 | -3.888953 |
| H | 8.410975  | -1.344197 | -2.686479 |

|   |           |           |           |
|---|-----------|-----------|-----------|
| C | 1.081560  | 0.410039  | -2.022184 |
| C | 0.300308  | -0.560985 | -1.372807 |
| C | 0.882886  | -1.465542 | -0.486349 |
| C | 2.252509  | -1.423412 | -0.234109 |
| C | 3.057632  | -0.460092 | -0.865610 |
| C | 2.456406  | 0.447251  | -1.751097 |
| H | -0.763213 | -0.619233 | -1.585273 |
| H | 0.265765  | -2.209979 | 0.009203  |
| H | 2.694716  | -2.115990 | 0.476081  |
| H | 3.070540  | 1.193634  | -2.246116 |
| C | -4.286889 | 5.264121  | -3.315985 |
| C | -3.029044 | 4.740024  | -3.616364 |
| C | -2.734809 | 3.401619  | -3.302135 |
| C | -3.721094 | 2.621758  | -2.686497 |
| C | -4.997393 | 3.130759  | -2.371180 |
| C | -5.259463 | 4.477697  | -2.706324 |
| H | -4.511532 | 6.298546  | -3.563580 |
| H | -2.267822 | 5.371206  | -4.065039 |
| H | -3.486585 | 1.591461  | -2.437961 |
| H | -6.242189 | 4.899126  | -2.517630 |
| C | -0.714371 | 3.163552  | -4.782850 |
| C | -1.399923 | 2.824292  | -3.604215 |
| C | -0.788074 | 1.927533  | -2.715612 |
| C | 0.468348  | 1.364111  | -2.980402 |
| C | 1.130393  | 1.722749  | -4.165835 |
| C | 0.539441  | 2.618592  | -5.055710 |
| H | -1.179391 | 3.836506  | -5.497330 |
| H | -1.280503 | 1.699322  | -1.774969 |
| H | 2.092691  | 1.277550  | -4.402384 |
| H | 1.051110  | 2.878258  | -5.978609 |

172

**III** in the quintet state SCF = -4240.77203208

|    |            |           |          |
|----|------------|-----------|----------|
| Mo | -9.437598  | -0.569165 | 0.603232 |
| Mo | 9.457036   | -0.148349 | 0.367920 |
| I  | -11.351893 | -2.152889 | 1.984275 |

|   |            |           |           |
|---|------------|-----------|-----------|
| I | 12.090017  | -0.100593 | 1.372643  |
| P | -9.709736  | 1.618911  | 1.812483  |
| P | -8.564891  | -2.262711 | -1.040211 |
| P | 8.719945   | 2.128169  | 1.051344  |
| P | 9.219927   | -2.593670 | -0.124071 |
| N | 9.930895   | 0.697671  | -2.549606 |
| N | 9.745545   | 0.361122  | -1.473141 |
| N | -7.989856  | 0.627950  | -0.445546 |
| N | 7.297010   | -0.272608 | 0.000045  |
| C | -9.096199  | 2.684497  | 0.394552  |
| C | -7.999803  | 2.021568  | -0.399905 |
| C | -7.063326  | 2.798491  | -1.047330 |
| C | -6.024200  | 2.237079  | -1.823697 |
| C | -6.030653  | 0.824401  | -1.878944 |
| C | -6.968982  | 0.066826  | -1.211200 |
| C | -6.895656  | -1.438067 | -1.279090 |
| C | -11.442167 | 2.338114  | 2.153653  |
| C | -11.497703 | 3.878509  | 2.147152  |
| C | -12.355961 | 1.805134  | 1.024774  |
| C | -11.971052 | 1.791868  | 3.494453  |
| C | -8.498447  | 1.903535  | 3.256567  |
| C | -7.068529  | 1.725450  | 2.697513  |
| C | -8.605496  | 3.296883  | 3.898256  |
| C | -8.744116  | 0.809200  | 4.317504  |
| C | -9.405962  | -2.253027 | -2.750145 |
| C | -9.306596  | -0.811114 | -3.299323 |
| C | -8.762731  | -3.211295 | -3.766318 |
| C | -10.899326 | -2.597806 | -2.564513 |
| C | -8.084307  | -4.019309 | -0.471617 |
| C | -6.915273  | -4.640188 | -1.262337 |
| C | -9.319328  | -4.938842 | -0.540126 |
| C | -7.664249  | -3.889364 | 1.011270  |
| C | 7.283226   | 2.182163  | -0.151471 |
| C | 6.551000   | 0.868419  | -0.190894 |
| C | 5.184833   | 0.832695  | -0.431036 |
| C | 4.489974   | -0.384447 | -0.504605 |

|   |            |           |           |
|---|------------|-----------|-----------|
| C | 5.258575   | -1.539180 | -0.300908 |
| C | 6.621226   | -1.466561 | -0.047831 |
| C | 7.389909   | -2.726307 | 0.252971  |
| C | 7.889938   | 2.193533  | 2.787698  |
| C | 8.871650   | 2.730785  | 3.846231  |
| C | 6.587604   | 3.016095  | 2.808658  |
| C | 7.546911   | 0.735422  | 3.175250  |
| C | 9.647500   | 3.763001  | 0.679753  |
| C | 9.996831   | 3.760733  | -0.825638 |
| C | 10.982266  | 3.794570  | 1.454129  |
| C | 8.817936   | 5.020099  | 0.997836  |
| C | 9.930968   | -3.880131 | 1.111364  |
| C | 11.408032  | -4.149824 | 0.764800  |
| C | 9.868808   | -3.232186 | 2.514224  |
| C | 9.154021   | -5.211731 | 1.170716  |
| C | 9.376607   | -3.209341 | -1.928250 |
| C | 10.777671  | -2.818036 | -2.443548 |
| C | 9.157821   | -4.718623 | -2.132506 |
| C | 8.303306   | -2.457772 | -2.749232 |
| H | -9.982373  | 2.815460  | -0.240998 |
| H | -8.790755  | 3.685406  | 0.718229  |
| H | -7.121821  | 3.875109  | -0.919632 |
| H | -5.294353  | 0.302899  | -2.483056 |
| H | -6.390551  | -1.761252 | -2.195975 |
| H | -6.294005  | -1.812028 | -0.439919 |
| H | -11.184811 | 4.299604  | 1.185818  |
| H | -10.885707 | 4.328519  | 2.931198  |
| H | -12.534637 | 4.196997  | 2.316670  |
| H | -11.441586 | 2.218406  | 4.351998  |
| H | -11.899393 | 0.699973  | 3.540116  |
| H | -13.029678 | 2.062407  | 3.598344  |
| H | -12.020673 | 2.120269  | 0.029341  |
| H | -13.367868 | 2.206180  | 1.167614  |
| H | -12.421094 | 0.712859  | 1.038177  |
| H | -6.939556  | 0.755653  | 2.205593  |
| H | -6.800846  | 2.503832  | 1.976911  |

|   |            |           |           |
|---|------------|-----------|-----------|
| H | -6.355816  | 1.780740  | 3.530359  |
| H | -8.483141  | 4.099706  | 3.162627  |
| H | -7.808949  | 3.412044  | 4.645056  |
| H | -9.558261  | 3.442124  | 4.414470  |
| H | -7.990671  | 0.901224  | 5.110980  |
| H | -9.729120  | 0.889371  | 4.782981  |
| H | -8.664865  | -0.193939 | 3.884741  |
| H | -9.729122  | -0.078870 | -2.603281 |
| H | -8.275131  | -0.513824 | -3.511353 |
| H | -9.871873  | -0.752530 | -4.238234 |
| H | -7.690175  | -3.022194 | -3.887950 |
| H | -9.235123  | -3.067690 | -4.746908 |
| H | -8.899921  | -4.259973 | -3.489361 |
| H | -11.413624 | -2.498373 | -3.529646 |
| H | -11.055840 | -3.619131 | -2.209582 |
| H | -11.382223 | -1.922821 | -1.849645 |
| H | -6.002224  | -4.039778 | -1.189934 |
| H | -7.145630  | -4.783142 | -2.319888 |
| H | -6.686899  | -5.627568 | -0.840049 |
| H | -9.609655  | -5.161896 | -1.571096 |
| H | -9.080873  | -5.894025 | -0.054893 |
| H | -10.177015 | -4.503552 | -0.016296 |
| H | -7.362986  | -4.877203 | 1.383886  |
| H | -8.488746  | -3.530494 | 1.634435  |
| H | -6.808303  | -3.217474 | 1.148111  |
| H | 7.755432   | 2.340870  | -1.126874 |
| H | 6.588442   | 3.010374  | 0.017066  |
| H | 4.653479   | 1.771543  | -0.550800 |
| H | 4.792967   | -2.518218 | -0.355794 |
| H | 6.922461   | -3.589398 | -0.232460 |
| H | 7.333271   | -2.908640 | 1.333356  |
| H | 9.824231   | 2.189839  | 3.828719  |
| H | 8.431305   | 2.596767  | 4.843076  |
| H | 9.075148   | 3.797461  | 3.723171  |
| H | 6.736293   | 4.050451  | 2.488581  |
| H | 6.190547   | 3.040788  | 3.832189  |

|   |           |           |           |
|---|-----------|-----------|-----------|
| H | 5.817197  | 2.566800  | 2.172952  |
| H | 6.832163  | 0.277905  | 2.486411  |
| H | 7.095869  | 0.727696  | 4.176937  |
| H | 8.445288  | 0.105646  | 3.219706  |
| H | 10.533089 | 2.856301  | -1.121662 |
| H | 10.648612 | 4.619212  | -1.031571 |
| H | 9.116287  | 3.867416  | -1.466833 |
| H | 10.849745 | 3.847750  | 2.535597  |
| H | 11.542037 | 4.688815  | 1.149717  |
| H | 11.596509 | 2.918245  | 1.230700  |
| H | 7.856512  | 5.025200  | 0.471684  |
| H | 9.373439  | 5.909137  | 0.671221  |
| H | 8.625559  | 5.133416  | 2.068332  |
| H | 11.512868 | -4.713181 | -0.167342 |
| H | 11.863062 | -4.751028 | 1.562885  |
| H | 11.979003 | -3.219699 | 0.680702  |
| H | 10.491298 | -2.336965 | 2.578595  |
| H | 10.241604 | -3.951567 | 3.255084  |
| H | 8.846393  | -2.967114 | 2.812129  |
| H | 8.102982  | -5.069227 | 1.444521  |
| H | 9.604002  | -5.846547 | 1.945464  |
| H | 9.189295  | -5.769980 | 0.235033  |
| H | 10.962687 | -1.746988 | -2.343916 |
| H | 10.855545 | -3.077980 | -3.507674 |
| H | 11.573796 | -3.348931 | -1.914095 |
| H | 9.950361  | -5.319490 | -1.678623 |
| H | 9.162888  | -4.935345 | -3.209087 |
| H | 8.193840  | -5.058248 | -1.736792 |
| H | 7.289585  | -2.788557 | -2.497408 |
| H | 8.462659  | -2.670013 | -3.814185 |
| H | 8.352911  | -1.376200 | -2.618118 |
| C | 1.073722  | 0.386893  | -1.978145 |
| C | 0.287374  | -0.577003 | -1.324294 |
| C | 0.864563  | -1.463874 | -0.416375 |
| C | 2.230329  | -1.409540 | -0.146883 |
| C | 3.041389  | -0.451690 | -0.781118 |

|   |           |           |           |
|---|-----------|-----------|-----------|
| C | 2.444165  | 0.438117  | -1.688119 |
| H | -0.772302 | -0.646354 | -1.552259 |
| H | 0.245560  | -2.204843 | 0.082475  |
| H | 2.667264  | -2.089696 | 0.578698  |
| H | 3.061283  | 1.178732  | -2.188465 |
| C | -4.312671 | 5.154867  | -3.523490 |
| C | -3.046466 | 4.630673  | -3.785722 |
| C | -2.743486 | 3.308879  | -3.414403 |
| C | -3.731227 | 2.545471  | -2.780365 |
| C | -5.014777 | 3.056107  | -2.500522 |
| C | -5.285773 | 4.385095  | -2.893502 |
| H | -4.543138 | 6.176072  | -3.816488 |
| H | -2.285180 | 5.250663  | -4.249605 |
| H | -3.491772 | 1.528268  | -2.486743 |
| H | -6.274681 | 4.803873  | -2.733177 |
| C | -0.697291 | 3.039370  | -4.853315 |
| C | -1.398931 | 2.733564  | -3.674967 |
| C | -0.794263 | 1.872614  | -2.746769 |
| C | 0.470779  | 1.311115  | -2.971696 |
| C | 1.149219  | 1.637272  | -4.157367 |
| C | 0.565844  | 2.497560  | -5.086404 |
| H | -1.156256 | 3.682551  | -5.598537 |
| H | -1.300363 | 1.670151  | -1.807466 |
| H | 2.118911  | 1.192802  | -4.362889 |
| H | 1.090812  | 2.730688  | -6.008999 |

182

**IV** in the triplet state SCF = -4471.82044248

|    |            |           |           |
|----|------------|-----------|-----------|
| Mo | 10.972580  | -0.417871 | 0.308209  |
| Mo | -10.543632 | 0.078494  | 0.557615  |
| I  | 13.306451  | -2.022097 | 0.548513  |
| I  | -13.040250 | 1.348362  | 1.086029  |
| P  | 11.479508  | 0.820674  | -1.820358 |
| P  | 9.721094   | -1.145532 | 2.367082  |
| P  | -9.243775  | 2.126018  | 0.372504  |
| P  | -11.321992 | -2.181386 | -0.030515 |



|   |            |           |           |
|---|------------|-----------|-----------|
| N | -9.221259  | -0.528998 | 3.282690  |
| N | -9.711379  | -0.307159 | 2.274314  |
| N | 9.203457   | 0.794415  | 0.133825  |
| N | -8.751525  | -0.678363 | -0.501886 |
| C | 10.408487  | 2.309119  | -1.415540 |
| C | 9.155287   | 1.935718  | -0.665025 |
| C | 8.025843   | 2.717600  | -0.785069 |
| C | 6.828309   | 2.420169  | -0.095706 |
| C | 6.887094   | 1.264591  | 0.715953  |
| C | 8.025044   | 0.493259  | 0.813543  |
| C | 8.021643   | -0.738523 | 1.681284  |
| C | 13.194373  | 1.606284  | -2.108109 |
| C | 13.163667  | 2.891184  | -2.958476 |
| C | 13.748677  | 1.954355  | -0.706641 |
| C | 14.130392  | 0.561478  | -2.745457 |
| C | 10.751302  | 0.051577  | -3.406841 |
| C | 9.226486   | -0.084538 | -3.193206 |
| C | 10.993860  | 0.884210  | -4.676812 |
| C | 11.345733  | -1.363047 | -3.576130 |
| C | 9.961867   | -0.039943 | 3.900454  |
| C | 9.616757   | 1.408355  | 3.484037  |
| C | 9.077435   | -0.427780 | 5.097771  |
| C | 11.452058  | -0.084653 | 4.302818  |
| C | 9.549838   | -2.992369 | 2.819192  |
| C | 8.221511   | -3.346047 | 3.516703  |
| C | 10.741851  | -3.421983 | 3.695775  |
| C | 9.629109   | -3.770002 | 1.484594  |
| C | -7.549934  | 1.298622  | 0.360341  |
| C | -7.572576  | 0.022206  | -0.435660 |
| C | -6.420997  | -0.421341 | -1.075021 |
| C | -6.410426  | -1.625850 | -1.793254 |
| C | -7.621087  | -2.330102 | -1.846526 |
| C | -8.764925  | -1.840052 | -1.224641 |
| C | -10.072028 | -2.569399 | -1.391388 |
| C | -9.397663  | 2.881326  | -1.399508 |
| C | -10.390376 | 4.059996  | -1.395819 |

|   |            |           |           |
|---|------------|-----------|-----------|
| C | -8.054254  | 3.312524  | -2.014386 |
| C | -10.010646 | 1.783267  | -2.302993 |
| C | -8.982051  | 3.532741  | 1.657324  |
| C | -8.501128  | 2.874749  | 2.970342  |
| C | -10.339509 | 4.201054  | 1.961849  |
| C | -7.947978  | 4.589511  | 1.231128  |
| C | -12.956349 | -2.457693 | -1.006869 |
| C | -14.127586 | -2.475011 | -0.005137 |
| C | -13.124456 | -1.229759 | -1.932148 |
| C | -13.003081 | -3.720286 | -1.892192 |
| C | -11.044622 | -3.598297 | 1.235128  |
| C | -11.762389 | -3.202276 | 2.542472  |
| C | -11.520324 | -4.991285 | 0.790709  |
| C | -9.524577  | -3.677591 | 1.502405  |
| H | 11.052351  | 2.926509  | -0.774681 |
| H | 10.168532  | 2.913462  | -2.296982 |
| H | 8.064728   | 3.567521  | -1.459898 |
| H | 6.026642   | 0.978633  | 1.313221  |
| H | 7.252332   | -0.665659 | 2.457557  |
| H | 7.772961   | -1.616437 | 1.069655  |
| H | 12.544074  | 3.671271  | -2.503163 |
| H | 12.803625  | 2.719332  | -3.974603 |
| H | 14.183230  | 3.290941  | -3.035013 |
| H | 13.855330  | 0.337659  | -3.780482 |
| H | 14.139434  | -0.370865 | -2.170431 |
| H | 15.154100  | 0.957340  | -2.758081 |
| H | 13.113058  | 2.667279  | -0.167577 |
| H | 14.735228  | 2.422306  | -0.821036 |
| H | 13.869625  | 1.061070  | -0.086862 |
| H | 8.988697   | -0.646300 | -2.284073 |
| H | 8.726690   | 0.886283  | -3.126322 |
| H | 8.798513   | -0.624047 | -4.047880 |
| H | 10.620662  | 1.909314  | -4.573885 |
| H | 10.458475  | 0.423066  | -5.517245 |
| H | 12.051904  | 0.925946  | -4.948639 |
| H | 10.870768  | -1.852470 | -4.436846 |

|   |            |           |           |
|---|------------|-----------|-----------|
| H | 12.423543  | -1.349038 | -3.754905 |
| H | 11.166633  | -1.981550 | -2.689843 |
| H | 10.205836  | 1.738671  | 2.622178  |
| H | 8.558982   | 1.530842  | 3.233010  |
| H | 9.841031   | 2.077900  | 4.324328  |
| H | 8.013603   | -0.445411 | 4.835050  |
| H | 9.205684   | 0.315356  | 5.895724  |
| H | 9.347841   | -1.401715 | 5.514524  |
| H | 11.626846  | 0.633068  | 5.115298  |
| H | 11.763532  | -1.069457 | 4.658880  |
| H | 12.103111  | 0.183839  | 3.463783  |
| H | 7.352737   | -3.107916 | 2.893994  |
| H | 8.099688   | -2.843929 | 4.478499  |
| H | 8.197292   | -4.427244 | 3.705855  |
| H | 10.689005  | -2.992871 | 4.700680  |
| H | 10.729036  | -4.513907 | 3.806428  |
| H | 11.698670  | -3.143977 | 3.241335  |
| H | 9.514458   | -4.842471 | 1.690163  |
| H | 10.591918  | -3.622957 | 0.986543  |
| H | 8.831592   | -3.487625 | 0.786771  |
| H | -7.378881  | 1.038241  | 1.410860  |
| H | -6.716168  | 1.933742  | 0.044222  |
| H | -5.527079  | 0.190620  | -1.022616 |
| H | -7.678265  | -3.280098 | -2.367184 |
| H | -9.897335  | -3.641183 | -1.534791 |
| H | -10.535241 | -2.207310 | -2.317280 |
| H | -11.342134 | 3.779836  | -0.930714 |
| H | -10.598187 | 4.357306  | -2.432488 |
| H | -9.995384  | 4.939092  | -0.880907 |
| H | -7.535704  | 4.062643  | -1.412697 |
| H | -8.230282  | 3.749062  | -3.006854 |
| H | -7.381290  | 2.458551  | -2.150542 |
| H | -9.356128  | 0.914635  | -2.414647 |
| H | -10.182741 | 2.195211  | -3.306912 |
| H | -10.989138 | 1.450448  | -1.927714 |
| H | -9.167088  | 2.072879  | 3.296501  |

|   |            |           |           |
|---|------------|-----------|-----------|
| H | -8.488235  | 3.638176  | 3.758860  |
| H | -7.484449  | 2.474971  | 2.898756  |
| H | -10.745102 | 4.753035  | 1.113075  |
| H | -10.204162 | 4.917041  | 2.783746  |
| H | -11.087435 | 3.464843  | 2.268065  |
| H | -6.973578  | 4.145104  | 0.996750  |
| H | -7.792910  | 5.297344  | 2.056734  |
| H | -8.276660  | 5.170356  | 0.365561  |
| H | -14.124751 | -3.379632 | 0.611339  |
| H | -15.077950 | -2.458183 | -0.555183 |
| H | -14.106615 | -1.599707 | 0.651789  |
| H | -13.189747 | -0.297883 | -1.366418 |
| H | -14.056727 | -1.337323 | -2.502318 |
| H | -12.312085 | -1.139706 | -2.665050 |
| H | -12.189363 | -3.747181 | -2.625228 |
| H | -13.943940 | -3.718053 | -2.458745 |
| H | -12.974658 | -4.647744 | -1.320073 |
| H | -11.417668 | -2.235218 | 2.915558  |
| H | -11.556385 | -3.957747 | 3.312678  |
| H | -12.847052 | -3.143862 | 2.415195  |
| H | -12.607746 | -5.046568 | 0.698213  |
| H | -11.220219 | -5.729974 | 1.546198  |
| H | -11.073570 | -5.299358 | -0.161505 |
| H | -8.972636  | -4.049785 | 0.632037  |
| H | -9.345326  | -4.379946 | 2.326800  |
| H | -9.099665  | -2.715750 | 1.792757  |
| C | -2.746986  | -2.320625 | -2.527326 |
| C | -2.856371  | -3.054812 | -3.719923 |
| C | -4.107110  | -3.316254 | -4.278060 |
| C | -5.267120  | -2.852455 | -3.661160 |
| C | -5.188780  | -2.119074 | -2.464508 |
| C | -3.922672  | -1.866608 | -1.913969 |
| H | -1.955901  | -3.395567 | -4.222546 |
| H | -4.177091  | -3.868764 | -5.210954 |
| H | -6.232728  | -3.032326 | -4.124163 |
| H | -3.848612  | -1.348408 | -0.962750 |

|   |           |           |           |
|---|-----------|-----------|-----------|
| C | 1.084605  | -1.436513 | -0.806008 |
| C | 0.840856  | -2.693026 | -1.358387 |
| C | -0.401502 | -2.991274 | -1.916436 |
| C | -1.421664 | -2.026650 | -1.926956 |
| C | -1.160119 | -0.766110 | -1.370975 |
| C | 0.084027  | -0.450213 | -0.806223 |
| H | 2.047781  | -1.221412 | -0.352290 |
| H | 1.619367  | -3.450979 | -1.339210 |
| H | -0.592685 | -3.980749 | -2.322004 |
| H | -1.924327 | 0.003715  | -1.425949 |
| C | 4.531281  | 5.385171  | -0.614079 |
| C | 3.274868  | 4.811433  | -0.414131 |
| C | 3.169927  | 3.442066  | -0.114696 |
| C | 4.340890  | 2.680862  | -0.021652 |
| C | 5.619794  | 3.240603  | -0.214412 |
| C | 5.688617  | 4.618192  | -0.515530 |
| H | 4.608159  | 6.444625  | -0.845284 |
| H | 2.376361  | 5.412450  | -0.518282 |
| H | 4.254108  | 1.621866  | 0.201166  |
| H | 6.656656  | 5.095397  | -0.636669 |
| C | 0.826419  | 3.464163  | 0.799287  |
| C | 1.844332  | 2.804458  | 0.091086  |
| C | 1.577911  | 1.526771  | -0.422948 |
| C | 0.337443  | 0.898614  | -0.239923 |
| C | -0.659594 | 1.580814  | 0.476792  |
| C | -0.413153 | 2.854136  | 0.987888  |
| H | 1.019399  | 4.445311  | 1.223534  |
| H | 2.337606  | 1.031896  | -1.020822 |
| H | -1.617716 | 1.100467  | 0.654639  |
| H | -1.186116 | 3.367250  | 1.554017  |

182

**IV** in the quintet state SCF = -4471.83530827

|    |            |           |          |
|----|------------|-----------|----------|
| Mo | 10.978882  | -0.364483 | 0.195367 |
| Mo | -10.555316 | 0.180975  | 0.409998 |
| I  | 13.351660  | -1.925296 | 0.118975 |

|   |            |           |           |
|---|------------|-----------|-----------|
| I | -13.008907 | 1.389903  | 1.099973  |
| P | 11.336164  | 1.078795  | -1.836498 |
| P | 9.866151   | -1.309941 | 2.244653  |
| P | -9.177014  | 2.224154  | 0.102665  |
| P | -11.337899 | -2.152614 | -0.051724 |
| N | -9.434724  | -0.413934 | 3.210389  |
| N | -9.850704  | -0.219232 | 2.164056  |
| N | 9.174404   | 0.805165  | 0.231814  |
| N | -8.755183  | -0.666825 | -0.518176 |
| C | 10.257496  | 2.489828  | -1.227257 |
| C | 9.053822   | 2.009699  | -0.458178 |
| C | 7.896815   | 2.759076  | -0.457978 |
| C | 6.743138   | 2.362054  | 0.255259  |
| C | 6.876774   | 1.145237  | 0.961798  |
| C | 8.041958   | 0.408352  | 0.940338  |
| C | 8.119814   | -0.892231 | 1.698459  |
| C | 13.008292  | 1.946287  | -2.151158 |
| C | 12.880806  | 3.312903  | -2.852618 |
| C | 13.647274  | 2.161067  | -0.759382 |
| C | 13.931291  | 1.017612  | -2.963403 |
| C | 10.533331  | 0.438555  | -3.443451 |
| C | 9.034729   | 0.203640  | -3.147073 |
| C | 10.649386  | 1.406800  | -4.633045 |
| C | 11.176139  | -0.919558 | -3.797037 |
| C | 10.177252  | -0.342257 | 3.858896  |
| C | 9.751024   | 1.121974  | 3.607794  |
| C | 9.398294   | -0.877012 | 5.072550  |
| C | 11.693534  | -0.360960 | 4.148088  |
| C | 9.769002   | -3.193868 | 2.528995  |
| C | 8.505815   | -3.650960 | 3.284529  |
| C | 11.036241  | -3.664214 | 3.268881  |
| C | 9.766872   | -3.842835 | 1.124740  |
| C | -7.539705  | 1.326536  | 0.258975  |
| C | -7.557679  | 0.010965  | -0.468462 |
| C | -6.397391  | -0.484772 | -1.043525 |
| C | -6.377931  | -1.726765 | -1.697541 |

|   |            |           |           |
|---|------------|-----------|-----------|
| C | -7.604199  | -2.405597 | -1.746839 |
| C | -8.752791  | -1.868949 | -1.181090 |
| C | -10.070535 | -2.574054 | -1.365003 |
| C | -9.203366  | 2.873055  | -1.709872 |
| C | -10.143320 | 4.085846  | -1.845713 |
| C | -7.804023  | 3.221686  | -2.250199 |
| C | -9.789869  | 1.735287  | -2.580048 |
| C | -8.978901  | 3.663795  | 1.347563  |
| C | -8.639676  | 3.036756  | 2.718978  |
| C | -10.324082 | 4.404138  | 1.507244  |
| C | -7.867380  | 4.655671  | 0.960239  |
| C | -12.967309 | -2.409840 | -1.034850 |
| C | -14.156525 | -2.407460 | -0.054267 |
| C | -13.110725 | -1.195252 | -1.981513 |
| C | -13.006159 | -3.688512 | -1.898079 |
| C | -11.112902 | -3.508921 | 1.277413  |
| C | -11.860740 | -3.057720 | 2.549847  |
| C | -11.590316 | -4.912726 | 0.869292  |
| C | -9.598521  | -3.585582 | 1.577805  |
| H | 10.921872  | 3.050796  | -0.555906 |
| H | 9.959594   | 3.179009  | -2.024832 |
| H | 7.877092   | 3.664781  | -1.056540 |
| H | 6.054969   | 0.779884  | 1.570392  |
| H | 7.398299   | -0.905648 | 2.522459  |
| H | 7.854037   | -1.722909 | 1.030876  |
| H | 12.280553  | 4.020707  | -2.271399 |
| H | 12.446521  | 3.237925  | -3.851508 |
| H | 13.881507  | 3.750894  | -2.961830 |
| H | 13.589948  | 0.898358  | -3.995920 |
| H | 14.018094  | 0.028487  | -2.501540 |
| H | 14.936233  | 1.457602  | -3.001486 |
| H | 13.028018  | 2.785949  | -0.104601 |
| H | 14.608660  | 2.676234  | -0.884299 |
| H | 13.836684  | 1.210550  | -0.252107 |
| H | 8.886395   | -0.467495 | -2.294733 |
| H | 8.500337   | 1.134544  | -2.936168 |

|   |            |           |           |
|---|------------|-----------|-----------|
| H | 8.570329   | -0.258414 | -4.027726 |
| H | 10.232497  | 2.393834  | -4.402590 |
| H | 10.082208  | 1.002725  | -5.481979 |
| H | 11.683073  | 1.535197  | -4.964632 |
| H | 10.662311  | -1.344921 | -4.669462 |
| H | 12.236097  | -0.831907 | -4.046098 |
| H | 11.090301  | -1.632452 | -2.969882 |
| H | 10.262921  | 1.553519  | 2.741576  |
| H | 8.673793   | 1.222151  | 3.445087  |
| H | 10.013558  | 1.720380  | 4.489680  |
| H | 8.318986   | -0.912389 | 4.885974  |
| H | 9.561074   | -0.207425 | 5.927290  |
| H | 9.730771   | -1.874242 | 5.372855  |
| H | 11.900468  | 0.264716  | 5.026555  |
| H | 12.070977  | -1.364525 | 4.358085  |
| H | 12.266574  | 0.037152  | 3.303512  |
| H | 7.587296   | -3.376301 | 2.754940  |
| H | 8.447884   | -3.248091 | 4.297432  |
| H | 8.517063   | -4.745660 | 3.366816  |
| H | 11.056539  | -3.326371 | 4.309406  |
| H | 11.057239  | -4.761582 | 3.282249  |
| H | 11.945753  | -3.318985 | 2.765446  |
| H | 9.702900   | -4.932956 | 1.238375  |
| H | 10.683274  | -3.614729 | 0.572299  |
| H | 8.908699   | -3.530124 | 0.517553  |
| H | -7.449444  | 1.123268  | 1.331384  |
| H | -6.671643  | 1.922814  | -0.037803 |
| H | -5.496153  | 0.117582  | -0.991446 |
| H | -7.670802  | -3.376779 | -2.226984 |
| H | -9.920931  | -3.652983 | -1.477571 |
| H | -10.509773 | -2.220650 | -2.306393 |
| H | -11.137496 | 3.876310  | -1.435634 |
| H | -10.266698 | 4.325300  | -2.910145 |
| H | -9.746614  | 4.979447  | -1.357155 |
| H | -7.300885  | 3.986753  | -1.653669 |
| H | -7.894766  | 3.607565  | -3.274357 |



|   |            |           |           |
|---|------------|-----------|-----------|
| H | -7.157589  | 2.338498  | -2.292495 |
| H | -9.162012  | 0.840533  | -2.575538 |
| H | -9.867906  | 2.082399  | -3.619375 |
| H | -10.802016 | 1.456631  | -2.256187 |
| H | -9.359885  | 2.267122  | 3.007222  |
| H | -8.670157  | 3.826627  | 3.480009  |
| H | -7.635847  | 2.601524  | 2.750654  |
| H | -10.635549 | 4.927780  | 0.602086  |
| H | -10.218282 | 5.156920  | 2.299494  |
| H | -11.125982 | 3.718869  | 1.795067  |
| H | -6.898670  | 4.161035  | 0.824975  |
| H | -7.747447  | 5.393604  | 1.764577  |
| H | -8.101330  | 5.208688  | 0.046385  |
| H | -14.170635 | -3.303867 | 0.573139  |
| H | -15.094871 | -2.392931 | -0.624135 |
| H | -14.145924 | -1.524961 | 0.592864  |
| H | -13.188198 | -0.254663 | -1.430882 |
| H | -14.028909 | -1.310879 | -2.572343 |
| H | -12.279848 | -1.116100 | -2.694132 |
| H | -12.189695 | -3.724902 | -2.627225 |
| H | -13.945078 | -3.698964 | -2.467195 |
| H | -12.976470 | -4.605239 | -1.308489 |
| H | -11.522993 | -2.078571 | 2.895039  |
| H | -11.673898 | -3.783130 | 3.352872  |
| H | -12.942100 | -3.005801 | 2.395146  |
| H | -12.675747 | -4.963749 | 0.752265  |
| H | -11.314065 | -5.625770 | 1.657394  |
| H | -11.122620 | -5.257431 | -0.060042 |
| H | -9.035307  | -4.008760 | 0.738834  |
| H | -9.442995  | -4.243302 | 2.442551  |
| H | -9.169712  | -2.612973 | 1.821805  |
| C | -2.706526  | -2.514829 | -2.280216 |
| C | -2.788257  | -3.277954 | -3.457326 |
| C | -4.025363  | -3.538896 | -4.045547 |
| C | -5.197369  | -3.040274 | -3.481056 |
| C | -5.147851  | -2.270126 | -2.305285 |

|   |           |           |           |
|---|-----------|-----------|-----------|
| C | -3.895084 | -2.026812 | -1.719417 |
| H | -1.878737 | -3.642514 | -3.925508 |
| H | -4.073897 | -4.117370 | -4.964206 |
| H | -6.150587 | -3.219144 | -3.970000 |
| H | -3.847903 | -1.486517 | -0.778793 |
| C | 1.081694  | -1.657305 | -0.442470 |
| C | 0.857965  | -2.898305 | -1.036990 |
| C | -0.370588 | -3.188045 | -1.628971 |
| C | -1.397387 | -2.229601 | -1.640313 |
| C | -1.154737 | -0.984832 | -1.040829 |
| C | 0.071947  | -0.681131 | -0.433702 |
| H | 2.032405  | -1.448200 | 0.039743  |
| H | 1.640287  | -3.652529 | -1.022611 |
| H | -0.545464 | -4.168836 | -2.061693 |
| H | -1.919925 | -0.215684 | -1.088779 |
| C | 4.339986  | 5.279652  | 0.055236  |
| C | 3.109145  | 4.649732  | 0.242267  |
| C | 3.055239  | 3.258621  | 0.438867  |
| C | 4.252149  | 2.532209  | 0.440963  |
| C | 5.505737  | 3.147718  | 0.252194  |
| C | 5.522740  | 4.546396  | 0.060523  |
| H | 4.376527  | 6.355866  | -0.093996 |
| H | 2.189806  | 5.226608  | 0.206401  |
| H | 4.206696  | 1.456851  | 0.583219  |
| H | 6.471198  | 5.063519  | -0.050486 |
| C | 0.723621  | 3.157934  | 1.375803  |
| C | 1.753496  | 2.567576  | 0.624343  |
| C | 1.517529  | 1.312811  | 0.042655  |
| C | 0.294479  | 0.644456  | 0.196498  |
| C | -0.717054 | 1.260233  | 0.951707  |
| C | -0.499440 | 2.507843  | 1.534332  |
| H | 0.894002  | 4.117171  | 1.856003  |
| H | 2.284758  | 0.869245  | -0.585187 |
| H | -1.662082 | 0.745885  | 1.102698  |
| H | -1.281541 | 2.968446  | 2.132235  |

V in the triplet state SCF = -3548.79273544

|    |           |           |           |
|----|-----------|-----------|-----------|
| Mo | 3.264769  | 0.024225  | 0.031162  |
| Mo | -3.477366 | -0.004690 | 0.189869  |
| I  | 3.591270  | 1.847658  | 2.205689  |
| I  | -3.095856 | -1.997088 | 2.174631  |
| P  | 3.457124  | -2.153390 | 1.300685  |
| P  | 3.340232  | 1.604600  | -1.903590 |
| P  | -3.554034 | -1.493225 | -1.779739 |
| P  | -2.936502 | 2.035293  | 1.535802  |
| N  | -6.530264 | 0.299588  | 0.394725  |
| N  | -5.392641 | 0.218737  | 0.319293  |
| N  | 2.949984  | -1.347184 | -1.597000 |
| N  | -3.265306 | 1.476857  | -1.429344 |
| C  | 3.853450  | -3.192973 | -0.214329 |
| C  | 3.177903  | -2.717724 | -1.471337 |
| C  | 2.866859  | -3.619214 | -2.473985 |
| C  | 2.364101  | -3.183180 | -3.708574 |
| C  | 2.217945  | -1.802202 | -3.878744 |
| C  | 2.497476  | -0.919794 | -2.846899 |
| C  | 2.287019  | 0.557478  | -3.053265 |
| C  | 4.994127  | -2.442501 | 2.395443  |
| C  | 5.480882  | -3.905314 | 2.417343  |
| C  | 6.117095  | -1.552669 | 1.813547  |
| C  | 4.697991  | -1.967724 | 3.830818  |
| C  | 1.877915  | -2.906804 | 2.050540  |
| C  | 0.834201  | -2.899638 | 0.914214  |
| C  | 2.044397  | -4.344889 | 2.568212  |
| C  | 1.372065  | -1.993707 | 3.186815  |
| C  | 5.049867  | 1.755336  | -2.738637 |
| C  | 5.486645  | 0.334208  | -3.159583 |
| C  | 5.064719  | 2.656875  | -3.984901 |
| C  | 6.054117  | 2.281154  | -1.690609 |
| C  | 2.397457  | 3.267321  | -1.904965 |
| C  | 1.894043  | 3.716923  | -3.290662 |
| C  | 3.279105  | 4.358787  | -1.268185 |

|   |           |           |           |
|---|-----------|-----------|-----------|
| C | 1.172973  | 3.057771  | -0.988057 |
| C | -4.217716 | -0.198385 | -2.959221 |
| C | -3.582064 | 1.142425  | -2.728209 |
| C | -3.357688 | 2.004505  | -3.796492 |
| C | -2.826977 | 3.274779  | -3.576775 |
| C | -2.522068 | 3.626110  | -2.264430 |
| C | -2.730895 | 2.724988  | -1.222222 |
| C | -2.244101 | 3.085065  | 0.154968  |
| C | -1.773827 | -1.862512 | -2.389628 |
| C | -1.299266 | -3.248071 | -1.910506 |
| C | -1.592375 | -1.738531 | -3.912851 |
| C | -0.879031 | -0.807335 | -1.695814 |
| C | -4.719316 | -2.973796 | -2.088382 |
| C | -6.170786 | -2.471632 | -1.911831 |
| C | -4.473750 | -4.051610 | -1.011389 |
| C | -4.569040 | -3.581449 | -3.494962 |
| C | -1.415051 | 1.985471  | 2.701041  |
| C | -1.830198 | 1.426650  | 4.075507  |
| C | -0.420666 | 0.997768  | 2.049100  |
| C | -0.685211 | 3.333367  | 2.890538  |
| C | -4.342515 | 3.098110  | 2.266089  |
| C | -5.177843 | 2.207499  | 3.210274  |
| C | -3.876338 | 4.353241  | 3.023294  |
| C | -5.224723 | 3.548463  | 1.079261  |
| H | 4.938057  | -3.068677 | -0.335850 |
| H | 3.674095  | -4.260681 | -0.051816 |
| H | 3.043440  | -4.675959 | -2.293684 |
| H | 2.125805  | -3.881805 | -4.502867 |
| H | 1.871148  | -1.396893 | -4.825584 |
| H | 2.407734  | 0.820976  | -4.110318 |
| H | 1.259239  | 0.828522  | -2.780238 |
| H | 5.776270  | -4.260179 | 1.424323  |
| H | 4.731564  | -4.592978 | 2.815213  |
| H | 6.367035  | -3.975393 | 3.061845  |
| H | 4.012816  | -2.644958 | 4.348733  |
| H | 4.275786  | -0.957228 | 3.845680  |

|   |           |           |           |
|---|-----------|-----------|-----------|
| H | 5.634795  | -1.948765 | 4.402689  |
| H | 6.341828  | -1.790682 | 0.766402  |
| H | 7.038064  | -1.716480 | 2.388774  |
| H | 5.863579  | -0.489788 | 1.878741  |
| H | 0.699906  | -1.897533 | 0.496242  |
| H | 1.107848  | -3.569962 | 0.093460  |
| H | -0.136313 | -3.218180 | 1.311998  |
| H | 2.443518  | -5.021513 | 1.803702  |
| H | 1.061296  | -4.730874 | 2.867291  |
| H | 2.694359  | -4.393471 | 3.446648  |
| H | 0.342115  | -2.272217 | 3.442158  |
| H | 1.978802  | -2.080555 | 4.091087  |
| H | 1.370151  | -0.943644 | 2.887294  |
| H | 5.478071  | -0.361386 | -2.314767 |
| H | 4.847679  | -0.083192 | -3.943832 |
| H | 6.510877  | 0.381367  | -3.551476 |
| H | 4.334916  | 2.332538  | -4.735301 |
| H | 6.057547  | 2.609187  | -4.451263 |
| H | 4.870012  | 3.704863  | -3.742752 |
| H | 7.059905  | 2.299745  | -2.131334 |
| H | 5.819400  | 3.293801  | -1.353870 |
| H | 6.081686  | 1.637576  | -0.804561 |
| H | 1.203010  | 2.990675  | -3.731840 |
| H | 2.703684  | 3.894891  | -4.000580 |
| H | 1.341193  | 4.659343  | -3.178694 |
| H | 4.116768  | 4.644262  | -1.911205 |
| H | 2.672757  | 5.259539  | -1.105208 |
| H | 3.670703  | 4.040095  | -0.295920 |
| H | 0.580346  | 3.982319  | -0.973650 |
| H | 1.473926  | 2.829565  | 0.038273  |
| H | 0.511853  | 2.258785  | -1.344031 |
| H | -5.278177 | -0.121886 | -2.695461 |
| H | -4.158766 | -0.481688 | -4.014588 |
| H | -3.621670 | 1.676320  | -4.797105 |
| H | -2.657742 | 3.963931  | -4.398021 |
| H | -2.096107 | 4.597841  | -2.033444 |

|   |           |           |           |
|---|-----------|-----------|-----------|
| H | -2.364448 | 4.157878  | 0.339755  |
| H | -1.167527 | 2.896473  | 0.175599  |
| H | -1.432613 | -3.365155 | -0.830067 |
| H | -0.229536 | -3.353530 | -2.131316 |
| H | -1.820710 | -4.064881 | -2.416792 |
| H | -2.219633 | -2.441698 | -4.468239 |
| H | -0.546836 | -1.951216 | -4.168060 |
| H | -1.817439 | -0.725235 | -4.264001 |
| H | -1.061195 | 0.204233  | -2.069744 |
| H | 0.172074  | -1.053551 | -1.875109 |
| H | -1.018806 | -0.811062 | -0.604912 |
| H | -6.315958 | -1.946837 | -0.963968 |
| H | -6.842750 | -3.339201 | -1.919176 |
| H | -6.491185 | -1.813621 | -2.726140 |
| H | -3.477782 | -4.493486 | -1.070193 |
| H | -5.202427 | -4.861211 | -1.150302 |
| H | -4.600855 | -3.645469 | -0.004552 |
| H | -4.720039 | -2.836800 | -4.284904 |
| H | -5.327410 | -4.363546 | -3.632959 |
| H | -3.591094 | -4.047022 | -3.645088 |
| H | -2.433694 | 2.143673  | 4.641349  |
| H | -0.927927 | 1.219792  | 4.665539  |
| H | -2.391303 | 0.491695  | 3.981625  |
| H | -0.796864 | -0.027384 | 2.067288  |
| H | 0.525508  | 1.030183  | 2.598837  |
| H | -0.177283 | 1.258500  | 1.011873  |
| H | -0.336426 | 3.761332  | 1.945175  |
| H | 0.210051  | 3.160133  | 3.500457  |
| H | -1.293328 | 4.081274  | 3.401397  |
| H | -5.557275 | 1.318610  | 2.702067  |
| H | -6.038979 | 2.781097  | 3.578457  |
| H | -4.602070 | 1.879144  | 4.080502  |
| H | -3.352220 | 4.105913  | 3.950149  |
| H | -4.755198 | 4.952409  | 3.296692  |
| H | -3.222871 | 4.990134  | 2.416206  |
| H | -4.709631 | 4.270471  | 0.435354  |

|   |           |          |          |
|---|-----------|----------|----------|
| H | -6.121207 | 4.044525 | 1.473272 |
| H | -5.555930 | 2.712193 | 0.461925 |

144

**V** in the quintet state SCF = -3548.79280291

|    |           |           |           |
|----|-----------|-----------|-----------|
| Mo | 3.248096  | 0.043097  | 0.041604  |
| Mo | -3.465117 | -0.029722 | 0.172073  |
| I  | 3.522417  | 1.921997  | 2.173664  |
| I  | -3.094723 | -1.992853 | 2.186187  |
| P  | 3.466497  | -2.098428 | 1.368548  |
| P  | 3.320091  | 1.579486  | -1.928623 |
| P  | -3.479897 | -1.540474 | -1.782512 |
| P  | -2.991275 | 2.038630  | 1.504719  |
| N  | -6.526238 | 0.228118  | 0.301659  |
| N  | -5.385985 | 0.164447  | 0.253961  |
| N  | 2.984591  | -1.372331 | -1.558188 |
| N  | -3.237723 | 1.437124  | -1.459538 |
| C  | 3.896886  | -3.169208 | -0.114936 |
| C  | 3.233809  | -2.735554 | -1.393897 |
| C  | 2.956109  | -3.667193 | -2.378620 |
| C  | 2.470230  | -3.271333 | -3.633295 |
| C  | 2.305365  | -1.897710 | -3.841396 |
| C  | 2.549363  | -0.984703 | -2.827454 |
| C  | 2.318104  | 0.483052  | -3.077857 |
| C  | 4.997533  | -2.326832 | 2.486421  |
| C  | 5.508404  | -3.779505 | 2.559944  |
| C  | 6.112315  | -1.438075 | 1.887423  |
| C  | 4.677785  | -1.810780 | 3.902326  |
| C  | 1.895391  | -2.861431 | 2.125804  |
| C  | 0.865735  | -2.914246 | 0.978285  |
| C  | 2.085312  | -4.278232 | 2.692027  |
| C  | 1.357592  | -1.921954 | 3.225033  |
| C  | 5.039278  | 1.757060  | -2.737633 |
| C  | 5.520554  | 0.337279  | -3.111785 |
| C  | 5.049124  | 2.625011  | -4.007405 |
| C  | 6.010635  | 2.337886  | -1.687945 |

|   |           |           |           |
|---|-----------|-----------|-----------|
| C | 2.334455  | 3.216302  | -1.978691 |
| C | 1.836382  | 3.619566  | -3.380531 |
| C | 3.177811  | 4.346944  | -1.358549 |
| C | 1.105653  | 2.994448  | -1.070366 |
| C | -4.134293 | -0.267271 | -2.990524 |
| C | -3.520549 | 1.083977  | -2.761202 |
| C | -3.283124 | 1.936804  | -3.834151 |
| C | -2.775961 | 3.217187  | -3.617126 |
| C | -2.506392 | 3.587565  | -2.302328 |
| C | -2.724606 | 2.694579  | -1.255086 |
| C | -2.271164 | 3.074016  | 0.127731  |
| C | -1.682934 | -1.893475 | -2.350419 |
| C | -1.203902 | -3.271288 | -1.853753 |
| C | -1.469927 | -1.775099 | -3.869902 |
| C | -0.816092 | -0.824750 | -1.642277 |
| C | -4.618594 | -3.039408 | -2.100646 |
| C | -6.080417 | -2.555648 | -1.962708 |
| C | -4.383062 | -4.102086 | -1.006389 |
| C | -4.429231 | -3.659622 | -3.497149 |
| C | -1.504854 | 2.031097  | 2.715619  |
| C | -1.955648 | 1.488995  | 4.085403  |
| C | -0.475856 | 1.048263  | 2.111901  |
| C | -0.802519 | 3.393710  | 2.903270  |
| C | -4.435560 | 3.095022  | 2.169436  |
| C | -5.290570 | 2.211029  | 3.102120  |
| C | -4.011203 | 4.369550  | 2.918820  |
| C | -5.281609 | 3.511072  | 0.944584  |
| H | 4.981356  | -3.033781 | -0.224735 |
| H | 3.729301  | -4.235055 | 0.071204  |
| H | 3.146663  | -4.715933 | -2.168097 |
| H | 2.258453  | -3.993767 | -4.413670 |
| H | 1.971905  | -1.522129 | -4.805122 |
| H | 2.465887  | 0.722082  | -4.137334 |
| H | 1.277798  | 0.742494  | -2.844407 |
| H | 5.815483  | -4.162102 | 1.580804  |
| H | 4.768744  | -4.466365 | 2.976574  |



|   |           |           |           |
|---|-----------|-----------|-----------|
| H | 6.391865  | -3.813285 | 3.211079  |
| H | 4.000573  | -2.483719 | 4.436185  |
| H | 4.235998  | -0.808802 | 3.879144  |
| H | 5.607994  | -1.754143 | 4.482504  |
| H | 6.353275  | -1.707457 | 0.851562  |
| H | 7.028886  | -1.567529 | 2.478179  |
| H | 5.841446  | -0.377868 | 1.914097  |
| H | 0.716704  | -1.930023 | 0.524867  |
| H | 1.163490  | -3.606520 | 0.184584  |
| H | -0.103234 | -3.239002 | 1.375147  |
| H | 2.509011  | -4.970332 | 1.954991  |
| H | 1.106452  | -4.675244 | 2.990565  |
| H | 2.723936  | -4.284649 | 3.579804  |
| H | 0.334266  | -2.219454 | 3.485746  |
| H | 1.961612  | -1.957218 | 4.134670  |
| H | 1.327678  | -0.884478 | 2.885831  |
| H | 5.516795  | -0.334398 | -2.247663 |
| H | 4.905172  | -0.118885 | -3.893344 |
| H | 6.549286  | 0.401125  | -3.489292 |
| H | 4.341164  | 2.259889  | -4.760015 |
| H | 6.050361  | 2.593832  | -4.456934 |
| H | 4.820406  | 3.672941  | -3.796473 |
| H | 7.023625  | 2.369179  | -2.111115 |
| H | 5.744771  | 3.353356  | -1.384751 |
| H | 6.037221  | 1.720478  | -0.783520 |
| H | 1.168490  | 2.866194  | -3.811596 |
| H | 2.650142  | 3.799609  | -4.085445 |
| H | 1.259518  | 4.550546  | -3.298394 |
| H | 4.014281  | 4.641550  | -1.999170 |
| H | 2.544029  | 5.233386  | -1.223527 |
| H | 3.566832  | 4.062925  | -0.374513 |
| H | 0.478107  | 3.895113  | -1.099930 |
| H | 1.400591  | 2.817026  | -0.032010 |
| H | 0.480506  | 2.157186  | -1.402833 |
| H | -5.201118 | -0.200950 | -2.750550 |
| H | -4.049045 | -0.561681 | -4.040998 |

|   |           |           |           |
|---|-----------|-----------|-----------|
| H | -3.519378 | 1.593549  | -4.836642 |
| H | -2.597743 | 3.899484  | -4.442190 |
| H | -2.099894 | 4.567907  | -2.072763 |
| H | -2.398827 | 4.148645  | 0.295961  |
| H | -1.194828 | 2.887796  | 0.175983  |
| H | -1.359306 | -3.383597 | -0.775899 |
| H | -0.128792 | -3.366841 | -2.051236 |
| H | -1.705149 | -4.096662 | -2.366407 |
| H | -2.079931 | -2.485594 | -4.435168 |
| H | -0.417931 | -1.981279 | -4.101479 |
| H | -1.694943 | -0.765148 | -4.230614 |
| H | -0.994334 | 0.180758  | -2.033839 |
| H | 0.241824  | -1.066478 | -1.784022 |
| H | -0.988831 | -0.815550 | -0.556167 |
| H | -6.255082 | -2.024133 | -1.023763 |
| H | -6.740000 | -3.432597 | -1.977473 |
| H | -6.390556 | -1.909872 | -2.790657 |
| H | -3.380890 | -4.532536 | -1.039000 |
| H | -5.098957 | -4.921964 | -1.151348 |
| H | -4.536455 | -3.686145 | -0.007123 |
| H | -4.575042 | -2.925866 | -4.298234 |
| H | -5.172491 | -4.454797 | -3.642329 |
| H | -3.441412 | -4.111282 | -3.622168 |
| H | -2.591947 | 2.203759  | 4.617240  |
| H | -1.070355 | 1.310163  | 4.709316  |
| H | -2.495110 | 0.541533  | 3.989355  |
| H | -0.836716 | 0.017878  | 2.138552  |
| H | 0.454321  | 1.106781  | 2.686663  |
| H | -0.205441 | 1.292540  | 1.077372  |
| H | -0.420947 | 3.804143  | 1.962714  |
| H | 0.068800  | 3.247729  | 3.553774  |
| H | -1.441559 | 4.144011  | 3.370632  |
| H | -5.645146 | 1.310038  | 2.597588  |
| H | -6.168674 | 2.781389  | 3.433510  |
| H | -4.739185 | 1.903632  | 3.995602  |
| H | -3.508071 | 4.145187  | 3.863203  |

|   |           |          |          |
|---|-----------|----------|----------|
| H | -4.907042 | 4.957955 | 3.158466 |
| H | -3.352000 | 5.007718 | 2.319262 |
| H | -4.755558 | 4.232152 | 0.308613 |
| H | -6.200851 | 3.996214 | 1.297454 |
| H | -5.573403 | 2.659055 | 0.328670 |

182

**TS<sub>II/VI</sub>** in the closed-shell singlet state SCF = -4471.85870329

|    |           |           |           |
|----|-----------|-----------|-----------|
| Mo | 1.836746  | 2.401373  | 0.314531  |
| Mo | 1.586954  | -2.484463 | -0.395436 |
| I  | 4.087718  | 3.097040  | 2.041237  |
| I  | 3.678818  | -3.618700 | -2.041317 |
| P  | 2.913352  | 2.893036  | -1.848110 |
| P  | 0.191190  | 3.245351  | 2.031745  |
| P  | 2.770863  | -3.034723 | 1.701775  |
| P  | -0.355075 | -2.954184 | -1.995749 |
| N  | 1.769481  | 0.667707  | 0.377410  |
| N  | 1.683434  | -0.767830 | -0.307315 |
| N  | 0.069519  | 2.890129  | -0.909548 |
| N  | -0.038542 | -2.955022 | 0.988924  |
| C  | 1.444736  | 3.535672  | -2.836681 |
| C  | 0.123357  | 3.102359  | -2.266369 |
| C  | -0.993618 | 2.979112  | -3.077884 |
| C  | -2.269965 | 2.710851  | -2.539370 |
| C  | -2.328137 | 2.717446  | -1.137759 |
| C  | -1.181545 | 2.771267  | -0.361980 |
| C  | -1.314602 | 2.602466  | 1.131110  |
| C  | 4.124935  | 4.372063  | -2.044716 |
| C  | 4.209194  | 4.953527  | -3.472138 |
| C  | 3.617963  | 5.492474  | -1.107821 |
| C  | 5.529202  | 3.937311  | -1.582751 |
| C  | 3.512960  | 1.377560  | -2.849957 |
| C  | 2.250846  | 0.548341  | -3.173962 |
| C  | 4.220861  | 1.697342  | -4.177712 |
| C  | 4.455062  | 0.552578  | -1.947644 |
| C  | -0.088877 | 5.136722  | 2.152594  |

|   |           |           |           |
|---|-----------|-----------|-----------|
| C | -0.363885 | 5.672161  | 0.728960  |
| C | -1.274884 | 5.523284  | 3.053489  |
| C | 1.202916  | 5.810635  | 2.660534  |
| C | 0.024950  | 2.413587  | 3.743729  |
| C | 0.908969  | 3.137182  | 4.777418  |
| C | 0.574083  | 0.983903  | 3.568673  |
| C | -1.427890 | 2.318741  | 4.254561  |
| C | 1.468384  | -2.242868 | 2.796604  |
| C | 0.085919  | -2.569040 | 2.299965  |
| C | -1.029799 | -2.443879 | 3.125089  |
| C | -2.311511 | -2.737740 | 2.639938  |
| C | -2.393148 | -3.295359 | 1.353615  |
| C | -1.257113 | -3.426213 | 0.573256  |
| C | -1.278940 | -4.058073 | -0.781631 |
| C | 2.785908  | -4.903369 | 2.176376  |
| C | 4.123128  | -5.541103 | 1.747838  |
| C | 2.532292  | -5.134722 | 3.678441  |
| C | 1.669679  | -5.628363 | 1.388866  |
| C | 4.389018  | -2.192469 | 2.276424  |
| C | 4.141128  | -0.670957 | 2.326582  |
| C | 5.481141  | -2.445529 | 1.214985  |
| C | 4.874622  | -2.636795 | 3.669336  |
| C | -0.282974 | -4.062659 | -3.561729 |
| C | 0.664643  | -3.397348 | -4.583421 |
| C | 0.331796  | -5.417728 | -3.139916 |
| C | -1.643207 | -4.348680 | -4.224512 |
| C | -1.604909 | -1.520414 | -2.254698 |
| C | -1.276963 | -0.783457 | -3.566597 |
| C | -3.080942 | -1.977218 | -2.271474 |
| C | -1.462196 | -0.516325 | -1.092169 |
| H | 1.478972  | 4.628588  | -2.747993 |
| H | 1.514945  | 3.307574  | -3.904286 |
| H | -0.850719 | 3.082305  | -4.147192 |
| H | -3.264590 | 2.567917  | -0.615665 |
| H | -2.268060 | 3.017951  | 1.478009  |
| H | -1.328674 | 1.528931  | 1.361474  |

|   |           |           |           |
|---|-----------|-----------|-----------|
| H | 3.238121  | 5.295606  | -3.846310 |
| H | 4.623949  | 4.251501  | -4.195781 |
| H | 4.870626  | 5.830030  | -3.453788 |
| H | 5.980485  | 3.219462  | -2.274124 |
| H | 5.508272  | 3.496071  | -0.582531 |
| H | 6.186298  | 4.816676  | -1.546920 |
| H | 2.609824  | 5.836977  | -1.372471 |
| H | 4.287448  | 6.359040  | -1.192342 |
| H | 3.612646  | 5.176410  | -0.062360 |
| H | 1.625948  | 0.394603  | -2.295237 |
| H | 1.650982  | 1.016712  | -3.963725 |
| H | 2.554644  | -0.445715 | -3.524569 |
| H | 3.607463  | 2.322475  | -4.837355 |
| H | 4.411719  | 0.753363  | -4.704903 |
| H | 5.186343  | 2.188620  | -4.030733 |
| H | 4.734129  | -0.373530 | -2.464112 |
| H | 5.371321  | 1.099974  | -1.704476 |
| H | 3.965916  | 0.273314  | -1.014210 |
| H | 0.445820  | 5.421068  | 0.036713  |
| H | -1.301741 | 5.295529  | 0.308827  |
| H | -0.438017 | 6.766283  | 0.775905  |
| H | -2.207576 | 5.039002  | 2.742467  |
| H | -1.433355 | 6.608175  | 2.993851  |
| H | -1.092629 | 5.279282  | 4.103027  |
| H | 1.063729  | 6.899981  | 2.644894  |
| H | 1.459211  | 5.523780  | 3.681884  |
| H | 2.061502  | 5.563959  | 2.030378  |
| H | 0.514417  | 4.121184  | 5.046849  |
| H | 1.936150  | 3.252441  | 4.415778  |
| H | 0.940503  | 2.537187  | 5.696612  |
| H | 1.630359  | 1.000793  | 3.289712  |
| H | 0.469553  | 0.442546  | 4.519098  |
| H | 0.032627  | 0.420286  | 2.802263  |
| H | -1.424018 | 1.824481  | 5.235106  |
| H | -2.058380 | 1.714084  | 3.594190  |
| H | -1.903241 | 3.293326  | 4.382296  |

|   |           |           |           |
|---|-----------|-----------|-----------|
| H | 1.650953  | -1.176619 | 2.647638  |
| H | 1.555736  | -2.443478 | 3.870265  |
| H | -0.902594 | -2.060899 | 4.132809  |
| H | -3.349862 | -3.629731 | 0.965826  |
| H | -2.293945 | -4.308944 | -1.098832 |
| H | -0.704291 | -4.990397 | -0.733034 |
| H | 4.323334  | -5.372988 | 0.684430  |
| H | 4.067705  | -6.625562 | 1.911781  |
| H | 4.972006  | -5.168850 | 2.324874  |
| H | 3.270487  | -4.644067 | 4.315551  |
| H | 2.577519  | -6.211631 | 3.889516  |
| H | 1.536713  | -4.787191 | 3.976335  |
| H | 0.670668  | -5.283218 | 1.666982  |
| H | 1.723977  | -6.702631 | 1.610946  |
| H | 1.795632  | -5.506634 | 0.307041  |
| H | 3.648692  | -0.285818 | 1.432966  |
| H | 5.104322  | -0.156694 | 2.413728  |
| H | 3.548483  | -0.369964 | 3.196409  |
| H | 5.707413  | -3.502676 | 1.064884  |
| H | 6.404038  | -1.947281 | 1.539776  |
| H | 5.192762  | -2.031127 | 0.245899  |
| H | 4.106353  | -2.485273 | 4.436438  |
| H | 5.739001  | -2.021196 | 3.950062  |
| H | 5.195611  | -3.681034 | 3.701851  |
| H | 0.266230  | -2.456888 | -4.970382 |
| H | 0.798795  | -4.074506 | -5.437548 |
| H | 1.649236  | -3.207106 | -4.149888 |
| H | 1.257933  | -5.296999 | -2.571937 |
| H | 0.579533  | -5.986563 | -4.045069 |
| H | -0.371138 | -6.027057 | -2.560564 |
| H | -2.358696 | -4.797706 | -3.526168 |
| H | -1.493275 | -5.065731 | -5.042735 |
| H | -2.096820 | -3.454082 | -4.658926 |
| H | -0.224392 | -0.490705 | -3.612228 |
| H | -1.879149 | 0.127156  | -3.621583 |
| H | -1.513709 | -1.382042 | -4.450104 |

|   |           |           |           |
|---|-----------|-----------|-----------|
| H | -3.292540 | -2.758840 | -3.001808 |
| H | -3.709423 | -1.112800 | -2.523643 |
| H | -3.401213 | -2.330793 | -1.285494 |
| H | -1.566956 | -0.988186 | -0.112423 |
| H | -2.262028 | 0.222816  | -1.192820 |
| H | -0.507289 | 0.008803  | -1.107827 |
| C | -5.798627 | -1.513987 | 3.483063  |
| C | -5.928538 | -2.007664 | 4.795224  |
| C | -4.879328 | -2.681941 | 5.417887  |
| C | -3.680710 | -2.906766 | 4.742936  |
| C | -3.541045 | -2.474625 | 3.416409  |
| C | -4.596132 | -1.776088 | 2.809001  |
| H | -6.862191 | -1.878004 | 5.332715  |
| H | -5.005319 | -3.048641 | 6.432945  |
| H | -2.869251 | -3.447740 | 5.221771  |
| H | -4.443923 | -1.394193 | 1.803972  |
| C | -8.927407 | 0.837879  | 1.680623  |
| C | -8.824724 | 0.739969  | 3.065971  |
| C | -7.806380 | -0.012471 | 3.645822  |
| C | -6.882677 | -0.713387 | 2.849508  |
| C | -7.006195 | -0.607090 | 1.452608  |
| C | -8.005107 | 0.175406  | 0.854257  |
| H | -9.695575 | 1.462088  | 1.233529  |
| H | -9.524822 | 1.277442  | 3.699853  |
| H | -7.713187 | -0.029281 | 4.726657  |
| H | -6.331411 | -1.162464 | 0.807945  |
| C | -4.377570 | 1.521101  | -5.462719 |
| C | -5.553076 | 1.132850  | -4.820875 |
| C | -5.708554 | 1.356870  | -3.441423 |
| C | -4.650528 | 1.957336  | -2.748773 |
| C | -3.429695 | 2.298877  | -3.359479 |
| C | -3.325735 | 2.091779  | -4.749453 |
| H | -4.266658 | 1.349305  | -6.529896 |
| H | -6.335806 | 0.634930  | -5.384676 |
| H | -4.795009 | 2.163635  | -1.696652 |
| H | -2.410235 | 2.336999  | -5.276619 |

|   |            |          |           |
|---|------------|----------|-----------|
| C | -8.198588  | 0.978035 | -3.359069 |
| C | -6.949422  | 0.973954 | -2.716212 |
| C | -6.910314  | 0.642432 | -1.351161 |
| C | -8.073439  | 0.371010 | -0.618193 |
| C | -9.305571  | 0.373957 | -1.292192 |
| C | -9.360137  | 0.665113 | -2.654176 |
| H | -8.267179  | 1.260861 | -4.405109 |
| H | -5.956944  | 0.621903 | -0.831964 |
| H | -10.215920 | 0.140209 | -0.747581 |
| H | -10.317901 | 0.667614 | -3.167502 |

182

**TS<sub>II/VI</sub>** in the triplet state SCF = -4471.84420466

|    |           |           |           |
|----|-----------|-----------|-----------|
| Mo | 1.679174  | -2.455946 | -0.168638 |
| Mo | 1.736360  | 2.402109  | 0.244757  |
| I  | 3.794212  | -3.267056 | -1.887610 |
| I  | 3.872583  | 3.589187  | 1.796847  |
| P  | 2.849499  | -2.721381 | 2.056681  |
| P  | -0.059238 | -3.407863 | -1.852377 |
| P  | 2.889838  | 2.770994  | -1.909336 |
| P  | -0.186062 | 3.062300  | 1.822511  |
| N  | 1.495503  | -0.728218 | -0.486242 |
| N  | 1.791776  | 0.679081  | 0.173578  |
| N  | -0.031906 | -2.866650 | 1.075783  |
| N  | 0.093283  | 2.740217  | -1.149801 |
| C  | 1.376842  | -3.292048 | 3.061223  |
| C  | 0.049884  | -2.888102 | 2.474024  |
| C  | -1.030688 | -2.653039 | 3.286636  |
| C  | -2.341969 | -2.428667 | 2.768966  |
| C  | -2.430108 | -2.619825 | 1.357404  |
| C  | -1.324021 | -2.767881 | 0.565887  |
| C  | -1.501546 | -2.702749 | -0.933937 |
| C  | 4.041509  | -4.213992 | 2.263302  |
| C  | 4.162455  | -4.698502 | 3.725365  |
| C  | 3.479665  | -5.387158 | 1.427335  |



|   |           |           |           |
|---|-----------|-----------|-----------|
| C | 5.440352  | -3.847758 | 1.731451  |
| C | 3.528030  | -1.172276 | 2.931435  |
| C | 2.295332  | -0.293056 | 3.230476  |
| C | 4.275478  | -1.413551 | 4.253162  |
| C | 4.454972  | -0.448525 | 1.932566  |
| C | -0.313737 | -5.303414 | -1.819203 |
| C | -0.516973 | -5.732677 | -0.347873 |
| C | -1.546141 | -5.749205 | -2.627790 |
| C | 0.947582  | -6.018722 | -2.345778 |
| C | -0.264670 | -2.698789 | -3.615398 |
| C | 0.538524  | -3.525435 | -4.637490 |
| C | 0.337375  | -1.280956 | -3.570079 |
| C | -1.739233 | -2.598673 | -4.057494 |
| C | 1.575516  | 1.861024  | -2.896467 |
| C | 0.202477  | 2.257273  | -2.428630 |
| C | -0.914732 | 2.119194  | -3.249413 |
| C | -2.184711 | 2.493844  | -2.792613 |
| C | -2.245143 | 3.145672  | -1.550190 |
| C | -1.105395 | 3.290367  | -0.777603 |
| C | -1.096560 | 4.051709  | 0.508459  |
| C | 2.879574  | 4.585049  | -2.550169 |
| C | 4.227620  | 5.262955  | -2.230052 |
| C | 2.569726  | 4.678856  | -4.056585 |
| C | 1.788013  | 5.375460  | -1.790251 |
| C | 4.500297  | 1.880965  | -2.435405 |
| C | 4.268562  | 0.363201  | -2.290721 |
| C | 5.635170  | 2.264658  | -1.462461 |
| C | 4.915573  | 2.163631  | -3.891183 |
| C | -0.062401 | 4.335475  | 3.254324  |
| C | 0.863697  | 3.758215  | 4.346905  |
| C | 0.592787  | 5.614253  | 2.683819  |
| C | -1.413388 | 4.731202  | 3.878038  |
| C | -1.468191 | 1.696430  | 2.247637  |
| C | -1.155829 | 1.105423  | 3.635001  |
| C | -2.933320 | 2.185808  | 2.214131  |
| C | -1.349438 | 0.570251  | 1.201536  |

|   |           |           |           |
|---|-----------|-----------|-----------|
| H | 1.425456  | -4.387806 | 3.057858  |
| H | 1.461157  | -2.978830 | 4.106016  |
| H | -0.856915 | -2.652500 | 4.357859  |
| H | -3.383883 | -2.542747 | 0.848755  |
| H | -2.460265 | -3.142783 | -1.227506 |
| H | -1.523724 | -1.646391 | -1.235047 |
| H | 3.197515  | -4.987487 | 4.154573  |
| H | 4.621074  | -3.960730 | 4.383459  |
| H | 4.801335  | -5.591198 | 3.742499  |
| H | 5.931539  | -3.097480 | 2.357767  |
| H | 5.402051  | -3.475668 | 0.704285  |
| H | 6.073041  | -4.745173 | 1.737032  |
| H | 2.468200  | -5.677389 | 1.736133  |
| H | 4.125460  | -6.263588 | 1.570234  |
| H | 3.463489  | -5.160829 | 0.359589  |
| H | 1.641837  | -0.193093 | 2.363998  |
| H | 1.712358  | -0.690126 | 4.068883  |
| H | 2.630640  | 0.717435  | 3.492438  |
| H | 3.672827  | -1.976297 | 4.975165  |
| H | 4.503132  | -0.438913 | 4.704032  |
| H | 5.225901  | -1.934553 | 4.109034  |
| H | 4.805015  | 0.490463  | 2.376023  |
| H | 5.330447  | -1.050715 | 1.671193  |
| H | 3.922631  | -0.187886 | 1.017120  |
| H | 0.324299  | -5.437497 | 0.285799  |
| H | -1.427319 | -5.315733 | 0.092141  |
| H | -0.597662 | -6.826792 | -0.315185 |
| H | -2.462785 | -5.249133 | -2.295996 |
| H | -1.694503 | -6.827844 | -2.487041 |
| H | -1.425372 | -5.575874 | -3.700175 |
| H | 0.806957  | -7.102860 | -2.242848 |
| H | 1.147444  | -5.810802 | -3.398361 |
| H | 1.839250  | -5.735474 | -1.780584 |
| H | 0.097524  | -4.509559 | -4.817949 |
| H | 1.578679  | -3.656926 | -4.322824 |
| H | 0.543788  | -2.990294 | -5.596063 |

|   |           |           |           |
|---|-----------|-----------|-----------|
| H | 1.409279  | -1.314430 | -3.358919 |
| H | 0.188478  | -0.799486 | -4.546490 |
| H | -0.131216 | -0.650721 | -2.809314 |
| H | -1.774869 | -2.191680 | -5.076631 |
| H | -2.314628 | -1.919407 | -3.420557 |
| H | -2.247101 | -3.565716 | -4.072582 |
| H | 1.748416  | 0.817034  | -2.624733 |
| H | 1.659120  | 1.942025  | -3.985727 |
| H | -0.799033 | 1.663979  | -4.227793 |
| H | -3.186950 | 3.548564  | -1.192659 |
| H | -2.101266 | 4.359263  | 0.807977  |
| H | -0.500458 | 4.959055  | 0.356934  |
| H | 4.471243  | 5.185535  | -1.164802 |
| H | 4.156255  | 6.329225  | -2.482110 |
| H | 5.055923  | 4.848042  | -2.808583 |
| H | 3.291737  | 4.142214  | -4.675511 |
| H | 2.591684  | 5.733090  | -4.363250 |
| H | 1.569181  | 4.294281  | -4.284171 |
| H | 0.781039  | 5.009963  | -2.005127 |
| H | 1.833054  | 6.426816  | -2.104347 |
| H | 1.948787  | 5.347815  | -0.706332 |
| H | 3.837797  | 0.092151  | -1.326303 |
| H | 5.232593  | -0.150897 | -2.377066 |
| H | 3.623746  | -0.047756 | -3.073072 |
| H | 5.866483  | 3.330877  | -1.461271 |
| H | 6.544896  | 1.726168  | -1.759564 |
| H | 5.389415  | 1.980774  | -0.436469 |
| H | 4.115511  | 1.918207  | -4.599104 |
| H | 5.776957  | 1.530840  | -4.141439 |
| H | 5.216626  | 3.201570  | -4.054942 |
| H | 0.440114  | 2.873466  | 4.827721  |
| H | 1.009027  | 4.518170  | 5.126481  |
| H | 1.846605  | 3.502268  | 3.944451  |
| H | 1.502937  | 5.400508  | 2.116763  |
| H | 0.877935  | 6.266436  | 3.518994  |
| H | -0.098451 | 6.185115  | 2.053496  |

|   |           |           |           |
|---|-----------|-----------|-----------|
| H | -2.119753 | 5.114031  | 3.132716  |
| H | -1.244522 | 5.533690  | 4.608437  |
| H | -1.888611 | 3.903252  | 4.410385  |
| H | -0.107341 | 0.809755  | 3.723157  |
| H | -1.768066 | 0.212400  | 3.784347  |
| H | -1.392199 | 1.801115  | 4.444610  |
| H | -3.124365 | 3.048119  | 2.853998  |
| H | -3.577453 | 1.367965  | 2.561908  |
| H | -3.250297 | 2.433254  | 1.195195  |
| H | -1.460474 | 0.932004  | 0.176332  |
| H | -2.152127 | -0.145439 | 1.391414  |
| H | -0.403576 | 0.033910  | 1.262766  |
| C | -5.721783 | 1.366462  | -3.553317 |
| C | -5.824975 | 1.751188  | -4.903629 |
| C | -4.744268 | 2.322097  | -5.574286 |
| C | -3.538505 | 2.550175  | -4.912921 |
| C | -3.422146 | 2.224217  | -3.554173 |
| C | -4.508812 | 1.626798  | -2.897391 |
| H | -6.762570 | 1.618433  | -5.433549 |
| H | -4.850806 | 2.607141  | -6.617455 |
| H | -2.703188 | 3.013950  | -5.430348 |
| H | -4.376661 | 1.321983  | -1.863726 |
| C | -8.949249 | -0.662089 | -1.548160 |
| C | -8.848675 | -0.696255 | -2.937010 |
| C | -7.800101 | -0.047610 | -3.585035 |
| C | -6.843232 | 0.680126  | -2.855128 |
| C | -6.968117 | 0.711861  | -1.455171 |
| C | -7.996167 | 0.032253  | -0.785074 |
| H | -9.741161 | -1.209438 | -1.045445 |
| H | -9.574916 | -1.258277 | -3.518170 |
| H | -7.710033 | -0.135112 | -4.662949 |
| H | -6.267867 | 1.294815  | -0.864723 |
| C | -4.339705 | -0.887058 | 5.590801  |
| C | -5.508917 | -0.495270 | 4.932532  |
| C | -5.683526 | -0.829765 | 3.575306  |
| C | -4.664270 | -1.528407 | 2.923234  |

|   |            |           |          |
|---|------------|-----------|----------|
| C | -3.440904  | -1.882245 | 3.545222 |
| C | -3.325643  | -1.565503 | 4.924484 |
| H | -4.209064  | -0.637160 | 6.641000 |
| H | -6.261163  | 0.084024  | 5.458502 |
| H | -4.831673  | -1.812317 | 1.892651 |
| H | -2.423445  | -1.822600 | 5.470160 |
| C | -8.162598  | -0.372889 | 3.483488 |
| C | -6.920812  | -0.468017 | 2.832255 |
| C | -6.893094  | -0.261831 | 1.442417 |
| C | -8.057393  | -0.024785 | 0.699333 |
| C | -9.281306  | 0.071161  | 1.381248 |
| C | -9.324154  | -0.090799 | 2.765130 |
| H | -8.224478  | -0.555941 | 4.551855 |
| H | -5.945834  | -0.320400 | 0.915500 |
| H | -10.191939 | 0.281036  | 0.827097 |
| H | -10.274449 | -0.016415 | 3.287398 |

182

**VI** in the closed-shell singlet state SCF = -4471.93825086

|    |           |           |           |
|----|-----------|-----------|-----------|
| Mo | -0.494394 | 3.692818  | 0.213737  |
| Mo | -2.948347 | -2.676923 | 0.095528  |
| I  | -1.530493 | 6.095230  | -1.017168 |
| I  | -5.205877 | -4.466396 | 0.211854  |
| P  | -1.374174 | 4.018509  | 2.540962  |
| P  | 1.385358  | 3.440287  | -1.385898 |
| P  | -3.803382 | -1.436669 | -1.894290 |
| P  | -1.242333 | -4.078302 | 1.312557  |
| N  | -1.408688 | 2.463631  | -0.422801 |
| N  | -3.154927 | -1.393126 | 1.123404  |
| N  | 0.937476  | 2.469441  | 1.396556  |
| N  | -1.094744 | -2.307822 | -1.107071 |
| C  | 0.137617  | 3.440874  | 3.511006  |
| C  | 0.968163  | 2.435653  | 2.761134  |
| C  | 1.764345  | 1.532540  | 3.457906  |
| C  | 2.574191  | 0.617019  | 2.773063  |
| C  | 2.549897  | 0.685420  | 1.372951  |

|   |           |           |           |
|---|-----------|-----------|-----------|
| C | 1.755921  | 1.612309  | 0.710285  |
| C | 1.811728  | 1.701962  | -0.794248 |
| C | -1.655236 | 5.733962  | 3.344894  |
| C | -1.568872 | 5.755650  | 4.885108  |
| C | -0.548448 | 6.661889  | 2.791681  |
| C | -3.021903 | 6.274584  | 2.882083  |
| C | -2.733700 | 2.757950  | 3.001928  |
| C | -2.148677 | 1.344872  | 2.790495  |
| C | -3.223200 | 2.870576  | 4.455996  |
| C | -3.921365 | 2.953284  | 2.037613  |
| C | 2.958706  | 4.481787  | -1.061622 |
| C | 3.364350  | 4.328732  | 0.422473  |
| C | 4.158030  | 4.064367  | -1.930332 |
| C | 2.622048  | 5.971698  | -1.292156 |
| C | 1.101937  | 3.193329  | -3.263809 |
| C | 1.194834  | 4.542200  | -4.003770 |
| C | -0.346397 | 2.680086  | -3.414709 |
| C | 2.066278  | 2.170744  | -3.898315 |
| C | -2.249512 | -0.392188 | -2.109908 |
| C | -1.040867 | -1.267099 | -1.998200 |
| C | 0.080410  | -1.055069 | -2.798899 |
| C | 1.210830  | -1.871900 | -2.681876 |
| C | 1.133101  | -2.940068 | -1.775235 |
| C | -0.027928 | -3.160932 | -1.045922 |
| C | -0.194993 | -4.400841 | -0.217876 |
| C | -3.928432 | -2.432538 | -3.530742 |
| C | -5.378710 | -2.914922 | -3.734186 |
| C | -3.446102 | -1.644448 | -4.763634 |
| C | -3.040834 | -3.692815 | -3.389224 |
| C | -5.182598 | -0.123439 | -1.757457 |
| C | -4.749106 | 0.903151  | -0.688292 |
| C | -6.465255 | -0.820745 | -1.256605 |
| C | -5.446775 | 0.632258  | -3.072262 |
| C | -1.512186 | -5.857190 | 1.988637  |
| C | -2.636060 | -5.779127 | 3.045057  |
| C | -2.010888 | -6.731897 | 0.815398  |

|   |           |           |           |
|---|-----------|-----------|-----------|
| C | -0.270802 | -6.540088 | 2.590423  |
| C | -0.036607 | -3.111142 | 2.461103  |
| C | -0.529751 | -3.194313 | 3.919382  |
| C | 1.420535  | -3.610742 | 2.358416  |
| C | -0.041944 | -1.621698 | 2.061002  |
| H | 0.746741  | 4.339241  | 3.668092  |
| H | -0.119376 | 3.062666  | 4.505628  |
| H | 1.754627  | 1.552676  | 4.542640  |
| H | 3.129337  | -0.013202 | 0.780256  |
| H | 2.766306  | 1.310300  | -1.163337 |
| H | 1.016399  | 1.082686  | -1.226165 |
| H | -0.603421 | 5.392238  | 5.254966  |
| H | -2.357522 | 5.176039  | 5.365980  |
| H | -1.672850 | 6.793938  | 5.226909  |
| H | -3.852692 | 5.722221  | 3.332254  |
| H | -3.120411 | 6.237609  | 1.792138  |
| H | -3.119519 | 7.323388  | 3.191696  |
| H | 0.460188  | 6.321174  | 3.059440  |
| H | -0.672473 | 7.661421  | 3.228375  |
| H | -0.606055 | 6.765108  | 1.705723  |
| H | -1.764745 | 1.203990  | 1.778254  |
| H | -1.351653 | 1.117287  | 3.508106  |
| H | -2.941713 | 0.602082  | 2.928406  |
| H | -2.403663 | 2.805432  | 5.181086  |
| H | -3.906063 | 2.036013  | 4.659400  |
| H | -3.777118 | 3.795791  | 4.637891  |
| H | -4.677018 | 2.185157  | 2.244579  |
| H | -4.395406 | 3.932072  | 2.154707  |
| H | -3.607189 | 2.846614  | 0.997940  |
| H | 2.560065  | 4.623906  | 1.103784  |
| H | 3.669765  | 3.309574  | 0.676470  |
| H | 4.219789  | 4.987806  | 0.618112  |
| H | 4.404542  | 3.003076  | -1.810087 |
| H | 5.041677  | 4.643675  | -1.631562 |
| H | 3.984686  | 4.259011  | -2.991040 |
| H | 3.484447  | 6.582062  | -0.992586 |

|   |           |           |           |
|---|-----------|-----------|-----------|
| H | 2.404134  | 6.200388  | -2.336111 |
| H | 1.755085  | 6.287851  | -0.702979 |
| H | 2.219074  | 4.922106  | -4.060083 |
| H | 0.557145  | 5.300872  | -3.538138 |
| H | 0.845271  | 4.399849  | -5.034780 |
| H | -1.073338 | 3.428044  | -3.088173 |
| H | -0.528148 | 2.446521  | -4.473057 |
| H | -0.533212 | 1.782131  | -2.823854 |
| H | 1.817166  | 2.058647  | -4.961901 |
| H | 1.982670  | 1.179208  | -3.445608 |
| H | 3.113785  | 2.475164  | -3.842343 |
| H | -2.253713 | 0.320778  | -1.277270 |
| H | -2.225548 | 0.195800  | -3.031354 |
| H | 0.072791  | -0.234800 | -3.506759 |
| H | 1.956384  | -3.641450 | -1.688123 |
| H | 0.768483  | -4.873788 | -0.008776 |
| H | -0.780191 | -5.116273 | -0.808287 |
| H | -5.748178 | -3.452477 | -2.854693 |
| H | -5.407530 | -3.605971 | -4.587052 |
| H | -6.063681 | -2.093238 | -3.957087 |
| H | -4.000743 | -0.716625 | -4.919782 |
| H | -3.578238 | -2.264688 | -5.660197 |
| H | -2.380392 | -1.399298 | -4.693073 |
| H | -1.981232 | -3.446405 | -3.278008 |
| H | -3.142366 | -4.300141 | -4.298635 |
| H | -3.354024 | -4.315085 | -2.543183 |
| H | -4.447209 | 0.420868  | 0.244763  |
| H | -5.605034 | 1.555859  | -0.473345 |
| H | -3.929781 | 1.545632  | -1.024695 |
| H | -6.868763 | -1.540628 | -1.971750 |
| H | -7.236169 | -0.058417 | -1.082593 |
| H | -6.285476 | -1.351560 | -0.317402 |
| H | -4.541078 | 1.119336  | -3.451276 |
| H | -6.185188 | 1.422501  | -2.884776 |
| H | -5.851049 | -0.011918 | -3.857692 |
| H | -2.344850 | -5.197798 | 3.923806  |



|   |           |           |           |
|---|-----------|-----------|-----------|
| H | -2.876323 | -6.794334 | 3.387924  |
| H | -3.545818 | -5.340959 | 2.625853  |
| H | -2.820977 | -6.257321 | 0.254628  |
| H | -2.407368 | -7.670877 | 1.222039  |
| H | -1.200489 | -6.998226 | 0.126822  |
| H | 0.555167  | -6.603475 | 1.872662  |
| H | -0.534647 | -7.568114 | 2.872801  |
| H | 0.092228  | -6.040299 | 3.492080  |
| H | -1.569822 | -2.862212 | 4.007311  |
| H | 0.088251  | -2.531346 | 4.539409  |
| H | -0.449406 | -4.200063 | 4.339271  |
| H | 1.534610  | -4.675884 | 2.564268  |
| H | 2.035349  | -3.067144 | 3.084238  |
| H | 1.841848  | -3.404258 | 1.368370  |
| H | 0.330939  | -1.461425 | 1.045194  |
| H | 0.625690  | -1.085571 | 2.742432  |
| H | -1.034649 | -1.177740 | 2.126643  |
| C | 4.872882  | -1.650333 | -3.679166 |
| C | 4.738452  | -1.438508 | -5.063520 |
| C | 3.480845  | -1.308362 | -5.652110 |
| C | 2.321982  | -1.417556 | -4.886020 |
| C | 2.421235  | -1.669895 | -3.508993 |
| C | 3.691974  | -1.760158 | -2.925301 |
| H | 5.620084  | -1.389488 | -5.694029 |
| H | 3.405237  | -1.142056 | -6.723054 |
| H | 1.344241  | -1.345143 | -5.353534 |
| H | 3.744944  | -1.889547 | -1.849357 |
| C | 8.696914  | -1.761484 | -1.682061 |
| C | 8.594934  | -1.251197 | -2.976240 |
| C | 7.364516  | -1.205401 | -3.630183 |
| C | 6.207851  | -1.726701 | -3.022148 |
| C | 6.345118  | -2.281540 | -1.741181 |
| C | 7.557059  | -2.262073 | -1.035638 |
| H | 9.645407  | -1.722930 | -1.154111 |
| H | 9.475655  | -0.843099 | -3.464587 |
| H | 7.304922  | -0.732737 | -4.605024 |

|   |          |           |           |
|---|----------|-----------|-----------|
| H | 5.487513 | -2.744319 | -1.265969 |
| C | 3.709807 | -2.072577 | 5.194822  |
| C | 4.848006 | -2.554992 | 4.544976  |
| C | 5.292683 | -1.957935 | 3.353414  |
| C | 4.562129 | -0.870001 | 2.856509  |
| C | 3.381939 | -0.415981 | 3.456259  |
| C | 2.968642 | -1.020003 | 4.655721  |
| H | 3.373320 | -2.549917 | 6.110888  |
| H | 5.373852 | -3.414921 | 4.949154  |
| H | 4.930271 | -0.345626 | 1.982765  |
| H | 2.048298 | -0.702851 | 5.137098  |
| C | 7.569283 | -3.081973 | 3.184646  |
| C | 6.465507 | -2.452950 | 2.586860  |
| C | 6.493824 | -2.262972 | 1.198979  |
| C | 7.583174 | -2.634066 | 0.402463  |
| C | 8.672316 | -3.262979 | 1.025338  |
| C | 8.652861 | -3.489140 | 2.403209  |
| H | 7.598227 | -3.224554 | 4.261061  |
| H | 5.650444 | -1.782840 | 0.717698  |
| H | 9.524807 | -3.583795 | 0.433206  |
| H | 9.500272 | -3.976506 | 2.877652  |

182

**VI** in the triplet state SCF = -4471.91874080

|    |           |           |           |
|----|-----------|-----------|-----------|
| Mo | -1.951634 | -3.043362 | -0.135218 |
| Mo | -1.629215 | 3.506099  | -0.208382 |
| I  | -4.187277 | -4.321239 | 1.184085  |
| I  | -3.002358 | 5.921278  | -0.541999 |
| P  | -2.802217 | -3.148214 | -2.498620 |
| P  | -0.274783 | -3.705328 | 1.565549  |
| P  | -2.928400 | 2.847785  | 1.899462  |
| P  | 0.581095  | 3.903863  | -1.466370 |
| N  | -2.058783 | -1.452874 | 0.323192  |
| N  | -2.297465 | 2.374498  | -1.220365 |
| N  | -0.050941 | -2.897365 | -1.283418 |
| N  | -0.093606 | 2.727230  | 1.162602  |

|   |           |           |           |
|---|-----------|-----------|-----------|
| C | -1.171169 | -3.521122 | -3.376714 |
| C | 0.020421  | -2.971389 | -2.643808 |
| C | 1.152653  | -2.570006 | -3.341431 |
| C | 2.279020  | -2.080741 | -2.661882 |
| C | 2.220724  | -2.105340 | -1.261368 |
| C | 1.070269  | -2.516572 | -0.596851 |
| C | 1.044761  | -2.530263 | 0.912727  |
| C | -3.883551 | -4.582174 | -3.162390 |
| C | -3.762776 | -4.844112 | -4.677666 |
| C | -3.419845 | -5.856792 | -2.418531 |
| C | -5.353100 | -4.306042 | -2.789236 |
| C | -3.339402 | -1.453515 | -3.191419 |
| C | -2.132110 | -0.502501 | -3.056333 |
| C | -3.779779 | -1.482916 | -4.664244 |
| C | -4.487747 | -0.924951 | -2.307990 |
| C | 0.472415  | -5.460419 | 1.392141  |
| C | 0.947571  | -5.662917 | -0.064835 |
| C | 1.672548  | -5.708910 | 2.322701  |
| C | -0.638448 | -6.499132 | 1.662086  |
| C | -0.429070 | -3.200471 | 3.402489  |
| C | -1.128728 | -4.311818 | 4.207669  |
| C | -1.340223 | -1.955644 | 3.422147  |
| C | 0.922062  | -2.834532 | 4.046143  |
| C | -1.841354 | 1.395388  | 2.275083  |
| C | -0.393429 | 1.786549  | 2.152791  |
| C | 0.564535  | 1.207435  | 2.945758  |
| C | 1.959808  | 1.468512  | 2.776568  |
| C | 2.248817  | 2.449029  | 1.781921  |
| C | 1.264048  | 3.054914  | 1.046274  |
| C | 1.592392  | 4.154123  | 0.072289  |
| C | -2.764104 | 4.026817  | 3.400090  |
| C | -3.952724 | 5.006690  | 3.450863  |
| C | -2.654156 | 3.246358  | 4.725749  |
| C | -1.473530 | 4.861196  | 3.224464  |
| C | -4.680801 | 2.126805  | 1.719001  |
| C | -4.597069 | 0.905098  | 0.778509  |

|   |           |           |           |
|---|-----------|-----------|-----------|
| C | -5.590354 | 3.179075  | 1.049886  |
| C | -5.272903 | 1.665480  | 3.063796  |
| C | 0.866484  | 5.447648  | -2.548799 |
| C | -0.265636 | 5.521933  | -3.596541 |
| C | 0.776504  | 6.689568  | -1.633651 |
| C | 2.236938  | 5.474050  | -3.250501 |
| C | 1.293130  | 2.314713  | -2.273346 |
| C | 0.750613  | 2.194478  | -3.711368 |
| C | 2.836893  | 2.287725  | -2.265815 |
| C | 0.808144  | 1.073697  | -1.489472 |
| H | -1.092788 | -4.614960 | -3.382596 |
| H | -1.167690 | -3.200103 | -4.423087 |
| H | 1.147362  | -2.633425 | -4.424082 |
| H | 3.048338  | -1.732752 | -0.668637 |
| H | 2.051879  | -2.704288 | 1.308252  |
| H | 0.720714  | -1.545763 | 1.274499  |
| H | -2.734874 | -5.071416 | -4.981228 |
| H | -4.121707 | -4.012906 | -5.286095 |
| H | -4.372765 | -5.721049 | -4.931773 |
| H | -5.773815 | -3.481308 | -3.372926 |
| H | -5.462830 | -4.078839 | -1.723960 |
| H | -5.954020 | -5.199395 | -3.004287 |
| H | -2.371086 | -6.107186 | -2.625338 |
| H | -4.022894 | -6.707592 | -2.761607 |
| H | -3.553644 | -5.770650 | -1.337447 |
| H | -1.757181 | -0.471717 | -2.032612 |
| H | -1.311760 | -0.778405 | -3.729184 |
| H | -2.449384 | 0.515181  | -3.309884 |
| H | -3.011679 | -1.905772 | -5.322329 |
| H | -3.963091 | -0.452584 | -4.995339 |
| H | -4.708138 | -2.041554 | -4.809368 |
| H | -4.733761 | 0.099687  | -2.614418 |
| H | -5.393047 | -1.532109 | -2.398347 |
| H | -4.194082 | -0.903893 | -1.257146 |
| H | 0.134445  | -5.534858 | -0.786275 |
| H | 1.760132  | -4.985205 | -0.343088 |

|   |           |           |           |
|---|-----------|-----------|-----------|
| H | 1.322508  | -6.689169 | -0.168844 |
| H | 2.471631  | -4.974530 | 2.169670  |
| H | 2.092891  | -6.701459 | 2.112744  |
| H | 1.388576  | -5.693350 | 3.377262  |
| H | -0.244828 | -7.503629 | 1.456404  |
| H | -0.988505 | -6.487038 | 2.695097  |
| H | -1.511610 | -6.335004 | 1.022468  |
| H | -0.492830 | -5.190483 | 4.350636  |
| H | -2.067365 | -4.621213 | 3.735746  |
| H | -1.369183 | -3.920950 | 5.204992  |
| H | -2.350226 | -2.187537 | 3.075005  |
| H | -1.396119 | -1.578534 | 4.452959  |
| H | -0.952779 | -1.157622 | 2.787769  |
| H | 0.750376  | -2.545148 | 5.091294  |
| H | 1.399433  | -1.980257 | 3.559115  |
| H | 1.634830  | -3.662015 | 4.053067  |
| H | -2.068556 | 0.639040  | 1.511282  |
| H | -2.056057 | 0.947296  | 3.248384  |
| H | 0.234561  | 0.490787  | 3.688433  |
| H | 3.268977  | 2.790409  | 1.635949  |
| H | 2.666627  | 4.212886  | -0.123439 |
| H | 1.276200  | 5.121684  | 0.484629  |
| H | -4.060581 | 5.559542  | 2.512250  |
| H | -3.770008 | 5.738524  | 4.248441  |
| H | -4.899108 | 4.509280  | 3.677284  |
| H | -3.507184 | 2.587963  | 4.906958  |
| H | -2.607617 | 3.963570  | 5.555452  |
| H | -1.738443 | 2.647176  | 4.760902  |
| H | -0.577037 | 4.238537  | 3.185320  |
| H | -1.378143 | 5.536790  | 4.084817  |
| H | -1.513107 | 5.479723  | 2.321771  |
| H | -4.086619 | 1.143926  | -0.156892 |
| H | -5.620184 | 0.592153  | 0.534089  |
| H | -4.095305 | 0.045051  | 1.229740  |
| H | -5.713198 | 4.085690  | 1.645863  |
| H | -6.585838 | 2.740215  | 0.904251  |

|   |           |           |           |
|---|-----------|-----------|-----------|
| H | -5.200090 | 3.470936  | 0.070599  |
| H | -4.630723 | 0.928488  | 3.558638  |
| H | -6.237984 | 1.179281  | 2.873698  |
| H | -5.452511 | 2.493016  | 3.754905  |
| H | -0.253447 | 4.674969  | -4.287571 |
| H | -0.140053 | 6.436246  | -4.190995 |
| H | -1.249342 | 5.562610  | -3.121233 |
| H | -0.128327 | 6.695887  | -1.020427 |
| H | 0.747049  | 7.585771  | -2.265918 |
| H | 1.651071  | 6.780213  | -0.980713 |
| H | 3.065806  | 5.390343  | -2.539084 |
| H | 2.346320  | 6.434306  | -3.770952 |
| H | 2.340918  | 4.684469  | -3.998420 |
| H | -0.344613 | 2.215803  | -3.727278 |
| H | 1.072120  | 1.230804  | -4.125418 |
| H | 1.129204  | 2.975879  | -4.375677 |
| H | 3.292943  | 3.108976  | -2.821030 |
| H | 3.172170  | 1.352928  | -2.730708 |
| H | 3.226885  | 2.298155  | -1.242611 |
| H | 1.244607  | 1.018391  | -0.490077 |
| H | 1.131812  | 0.188962  | -2.043198 |
| H | -0.275614 | 1.029441  | -1.396424 |
| C | 5.318757  | -0.029620 | 3.709556  |
| C | 4.998803  | -0.678960 | 4.918001  |
| C | 3.701953  | -0.587330 | 5.429870  |
| C | 2.712343  | 0.119146  | 4.757125  |
| C | 2.988716  | 0.774129  | 3.529313  |
| C | 4.318492  | 0.693021  | 3.050698  |
| H | 5.743001  | -1.280700 | 5.430044  |
| H | 3.459166  | -1.083894 | 6.366316  |
| H | 1.720030  | 0.182584  | 5.192269  |
| H | 4.567507  | 1.193643  | 2.121180  |
| C | 9.194771  | -0.550189 | 1.908876  |
| C | 9.066730  | -0.528910 | 3.297251  |
| C | 7.823795  | -0.337665 | 3.899190  |
| C | 6.673577  | -0.166915 | 3.110394  |

|   |           |           |           |
|---|-----------|-----------|-----------|
| C | 6.831035  | -0.165090 | 1.717988  |
| C | 8.070320  | -0.355640 | 1.088109  |
| H | 10.168658 | -0.742544 | 1.469996  |
| H | 9.947894  | -0.669465 | 3.917813  |
| H | 7.747039  | -0.307637 | 4.981826  |
| H | 5.944542  | -0.023863 | 1.112621  |
| C | 4.320611  | -0.148270 | -5.195672 |
| C | 5.559476  | -0.079279 | -4.558836 |
| C | 5.765923  | -0.723241 | -3.326600 |
| C | 4.695814  | -1.440451 | -2.772591 |
| C | 3.427909  | -1.473837 | -3.369252 |
| C | 3.255027  | -0.825930 | -4.605621 |
| H | 4.172329  | 0.365998  | -6.141172 |
| H | 6.358268  | 0.509209  | -4.999757 |
| H | 4.856054  | -1.993570 | -1.853714 |
| H | 2.279811  | -0.810759 | -5.082077 |
| C | 8.278565  | -0.410550 | -3.226912 |
| C | 7.044114  | -0.585209 | -2.581809 |
| C | 7.020945  | -0.577425 | -1.181336 |
| C | 8.166747  | -0.375528 | -0.398722 |
| C | 9.382327  | -0.178085 | -1.077556 |
| C | 9.432930  | -0.208076 | -2.471262 |
| H | 8.339423  | -0.446728 | -4.310698 |
| H | 6.067483  | -0.714155 | -0.688342 |
| H | 10.292237 | 0.022069  | -0.521245 |
| H | 10.385499 | -0.065203 | -2.974419 |

144

**C** in the closed-shell singlet state SCF = -3548.81987802

|    |           |           |           |
|----|-----------|-----------|-----------|
| Mo | 2.408282  | -0.085872 | -0.029969 |
| Mo | -2.537381 | -0.088783 | -0.017612 |
| I  | 3.343016  | -2.378550 | 1.470581  |
| I  | -3.287911 | -1.502627 | -2.392804 |
| P  | 2.916781  | -0.924037 | -2.311642 |
| P  | 3.120394  | 1.483129  | 1.705943  |
| P  | -2.634427 | -2.064192 | 1.401106  |

|   |           |           |           |
|---|-----------|-----------|-----------|
| P | -3.194080 | 2.178674  | -0.739902 |
| N | 0.526958  | 0.136612  | 0.039226  |
| N | -0.676402 | 0.113317  | 0.053773  |
| N | 2.598689  | 1.817973  | -1.142404 |
| N | -2.891504 | 0.849432  | 1.952617  |
| C | 3.389689  | 0.656830  | -3.180229 |
| C | 2.880369  | 1.894690  | -2.488267 |
| C | 2.849373  | 3.092896  | -3.195760 |
| C | 2.599124  | 4.298077  | -2.541862 |
| C | 2.418264  | 4.245005  | -1.160756 |
| C | 2.423861  | 3.023957  | -0.494196 |
| C | 2.295214  | 2.995815  | 1.002114  |
| C | 4.437124  | -2.027874 | -2.690516 |
| C | 4.943551  | -1.952403 | -4.146367 |
| C | 5.574368  | -1.536741 | -1.763744 |
| C | 4.105561  | -3.488886 | -2.328941 |
| C | 1.355897  | -1.518146 | -3.250475 |
| C | 0.433559  | -0.293413 | -3.421183 |
| C | 1.640566  | -2.099707 | -4.645652 |
| C | 0.631394  | -2.566163 | -2.381261 |
| C | 4.982936  | 1.935097  | 1.826052  |
| C | 5.440269  | 2.420391  | 0.431029  |
| C | 5.277323  | 3.052847  | 2.841727  |
| C | 5.801260  | 0.675270  | 2.172952  |
| C | 2.334723  | 1.395563  | 3.458159  |
| C | 2.087665  | 2.775188  | 4.100313  |
| C | 3.194996  | 0.525846  | 4.394750  |
| C | 0.975935  | 0.688728  | 3.276634  |
| C | -1.976108 | -1.222792 | 2.950581  |
| C | -2.512718 | 0.173486  | 3.087161  |
| C | -2.599394 | 0.765560  | 4.348221  |
| C | -3.079317 | 2.064565  | 4.477283  |
| C | -3.503496 | 2.732549  | 3.329670  |
| C | -3.424490 | 2.102759  | 2.089436  |
| C | -3.993980 | 2.764317  | 0.869156  |
| C | -4.478002 | -2.451455 | 1.811255  |



|   |           |           |           |
|---|-----------|-----------|-----------|
| C | -4.985427 | -3.599824 | 0.916684  |
| C | -4.721855 | -2.782574 | 3.294534  |
| C | -5.313459 | -1.197370 | 1.455174  |
| C | -1.622378 | -3.683594 | 1.354864  |
| C | -0.145317 | -3.254909 | 1.442009  |
| C | -1.826219 | -4.367218 | -0.014248 |
| C | -1.917328 | -4.670209 | 2.497427  |
| C | -4.676518 | 2.499643  | -1.935021 |
| C | -4.176560 | 2.349204  | -3.385026 |
| C | -5.735554 | 1.406042  | -1.663509 |
| C | -5.385264 | 3.861825  | -1.768700 |
| C | -1.839258 | 3.503160  | -1.032157 |
| C | -0.880744 | 2.944158  | -2.102480 |
| C | -2.303332 | 4.909792  | -1.442190 |
| C | -1.070580 | 3.630919  | 0.297588  |
| H | 4.485714  | 0.705527  | -3.138508 |
| H | 3.121431  | 0.655793  | -4.241654 |
| H | 3.055233  | 3.072596  | -4.261901 |
| H | 2.573656  | 5.239662  | -3.080897 |
| H | 2.267021  | 5.153063  | -0.584320 |
| H | 2.627488  | 3.945455  | 1.436605  |
| H | 1.247260  | 2.859399  | 1.283001  |
| H | 5.205675  | -0.932390 | -4.447607 |
| H | 4.227581  | -2.347107 | -4.868151 |
| H | 5.857048  | -2.556021 | -4.230923 |
| H | 3.371942  | -3.924590 | -3.014000 |
| H | 3.726917  | -3.575385 | -1.306356 |
| H | 5.019516  | -4.093633 | -2.400292 |
| H | 5.832787  | -0.484489 | -1.936412 |
| H | 6.477637  | -2.129708 | -1.960407 |
| H | 5.319016  | -1.659475 | -0.708617 |
| H | 0.255199  | 0.210754  | -2.473159 |
| H | 0.837345  | 0.435483  | -4.132596 |
| H | -0.540732 | -0.627027 | -3.794570 |
| H | 2.193420  | -1.398835 | -5.281521 |
| H | 0.681272  | -2.302150 | -5.139122 |

|   |           |           |           |
|---|-----------|-----------|-----------|
| H | 2.191258  | -3.042933 | -4.604562 |
| H | -0.253849 | -2.930277 | -2.915616 |
| H | 1.266090  | -3.423573 | -2.138955 |
| H | 0.281702  | -2.124443 | -1.446176 |
| H | 5.245723  | 1.670233  | -0.341561 |
| H | 4.954104  | 3.353278  | 0.130625  |
| H | 6.522447  | 2.602983  | 0.460409  |
| H | 4.705789  | 3.963834  | 2.630089  |
| H | 6.342115  | 3.316661  | 2.787723  |
| H | 5.071210  | 2.746626  | 3.870102  |
| H | 6.869770  | 0.929418  | 2.158869  |
| H | 5.566894  | 0.273984  | 3.160336  |
| H | 5.630212  | -0.126112 | 1.448907  |
| H | 1.380288  | 3.378579  | 3.522067  |
| H | 3.003633  | 3.355165  | 4.231433  |
| H | 1.646929  | 2.628611  | 5.095629  |
| H | 4.133661  | 1.013696  | 4.672549  |
| H | 2.636809  | 0.345432  | 5.323473  |
| H | 3.420957  | -0.446090 | 3.945740  |
| H | 0.472218  | 0.620167  | 4.250351  |
| H | 1.118651  | -0.320770 | 2.882427  |
| H | 0.303273  | 1.221114  | 2.596315  |
| H | -0.900817 | -1.161496 | 2.762646  |
| H | -2.109605 | -1.778689 | 3.885168  |
| H | -2.279094 | 0.200378  | 5.217367  |
| H | -3.138348 | 2.541092  | 5.451440  |
| H | -3.912748 | 3.735988  | 3.387371  |
| H | -3.993325 | 3.853258  | 0.982888  |
| H | -5.045232 | 2.462787  | 0.792521  |
| H | -4.799120 | -3.396037 | -0.143500 |
| H | -6.070177 | -3.706439 | 1.052641  |
| H | -4.531222 | -4.559635 | 1.173627  |
| H | -4.151096 | -3.651132 | 3.630755  |
| H | -5.786421 | -3.006831 | 3.447889  |
| H | -4.471821 | -1.936063 | 3.944012  |
| H | -5.091668 | -0.346297 | 2.103607  |

|   |           |           |           |
|---|-----------|-----------|-----------|
| H | -6.381016 | -1.429526 | 1.572074  |
| H | -5.177742 | -0.895306 | 0.406568  |
| H | 0.086069  | -2.420527 | 0.776838  |
| H | 0.500764  | -4.089138 | 1.147828  |
| H | 0.156512  | -2.971133 | 2.454320  |
| H | -2.842989 | -4.733305 | -0.167523 |
| H | -1.149821 | -5.229994 | -0.078941 |
| H | -1.592257 | -3.688530 | -0.837818 |
| H | -1.800329 | -4.204210 | 3.482807  |
| H | -1.200941 | -5.500960 | 2.444366  |
| H | -2.920589 | -5.101123 | 2.435642  |
| H | -3.501400 | 3.162712  | -3.669898 |
| H | -5.032648 | 2.379020  | -4.072471 |
| H | -3.662002 | 1.395304  | -3.534510 |
| H | -5.351745 | 0.403141  | -1.852193 |
| H | -6.589687 | 1.565241  | -2.335141 |
| H | -6.126132 | 1.443983  | -0.638613 |
| H | -5.754892 | 4.020766  | -0.749703 |
| H | -6.260865 | 3.883269  | -2.431421 |
| H | -4.759169 | 4.710984  | -2.039345 |
| H | -0.408676 | 2.024106  | -1.758570 |
| H | -0.087054 | 3.671917  | -2.303598 |
| H | -1.389859 | 2.729613  | -3.046700 |
| H | -2.730173 | 4.930635  | -2.448268 |
| H | -1.433294 | 5.581093  | -1.448087 |
| H | -3.035009 | 5.330034  | -0.743308 |
| H | -1.654417 | 4.145538  | 1.069186  |
| H | -0.162257 | 4.219172  | 0.124163  |
| H | -0.776911 | 2.651387  | 0.682874  |

144

**C** in the triplet state SCF = -3548.83343583

|    |           |           |           |
|----|-----------|-----------|-----------|
| Mo | 2.519564  | -0.097161 | -0.055262 |
| Mo | -2.461646 | -0.064304 | 0.008312  |
| I  | 3.378072  | -2.069460 | 1.883503  |
| I  | -3.408253 | -1.932039 | -1.987895 |

|   |           |           |           |
|---|-----------|-----------|-----------|
| P | 2.716345  | -1.453764 | -2.122684 |
| P | 3.131899  | 1.783227  | 1.397314  |
| P | -2.621437 | -1.696932 | 1.831870  |
| P | -3.151743 | 2.035945  | -1.152725 |
| N | 0.628825  | 0.092516  | 0.029396  |
| N | -0.569335 | 0.104936  | 0.056933  |
| N | 2.681799  | 1.521885  | -1.537445 |
| N | -2.759332 | 1.255474  | 1.743459  |
| C | 3.270928  | -0.098200 | -3.309584 |
| C | 2.890767  | 1.290764  | -2.874116 |
| C | 2.857896  | 2.317026  | -3.815581 |
| C | 2.664592  | 3.635942  | -3.410129 |
| C | 2.514161  | 3.883391  | -2.048089 |
| C | 2.521071  | 2.828999  | -1.136902 |
| C | 2.376008  | 3.122624  | 0.332212  |
| C | 4.195417  | -2.669913 | -2.319420 |
| C | 4.657552  | -2.920462 | -3.770719 |
| C | 5.384087  | -2.047347 | -1.549659 |
| C | 3.832389  | -4.011809 | -1.654863 |
| C | 1.138618  | -2.166957 | -2.929679 |
| C | 0.227791  | -0.968445 | -3.261209 |
| C | 1.364317  | -2.976618 | -4.216737 |
| C | 0.435052  | -3.043461 | -1.875321 |
| C | 5.002668  | 2.229919  | 1.435286  |
| C | 5.501822  | 2.300022  | -0.026618 |
| C | 5.293027  | 3.581904  | 2.110227  |
| C | 5.799852  | 1.112630  | 2.140250  |
| C | 2.329908  | 2.148328  | 3.101381  |
| C | 2.092583  | 3.642411  | 3.395187  |
| C | 3.158018  | 1.509532  | 4.232551  |
| C | 0.968288  | 1.429105  | 3.057421  |
| C | -1.878007 | -0.578393 | 3.140829  |
| C | -2.396202 | 0.822475  | 3.000861  |
| C | -2.496668 | 1.643947  | 4.121564  |
| C | -2.972724 | 2.946469  | 3.997924  |
| C | -3.389278 | 3.370610  | 2.737303  |

|   |           |           |           |
|---|-----------|-----------|-----------|
| C | -3.303243 | 2.512729  | 1.644155  |
| C | -3.901037 | 2.924456  | 0.328206  |
| C | -4.447072 | -1.965963 | 2.393931  |
| C | -5.008139 | -3.258067 | 1.767800  |
| C | -4.604809 | -1.999993 | 3.925638  |
| C | -5.299486 | -0.793015 | 1.854186  |
| C | -1.623375 | -3.312084 | 2.058056  |
| C | -0.134306 | -2.915773 | 2.013372  |
| C | -1.898540 | -4.248226 | 0.862662  |
| C | -1.884738 | -4.052514 | 3.382504  |
| C | -4.648518 | 2.135737  | -2.366148 |
| C | -4.181140 | 1.660239  | -3.755491 |
| C | -5.722793 | 1.154444  | -1.843253 |
| C | -5.320659 | 3.520617  | -2.484910 |
| C | -1.761706 | 3.228563  | -1.716943 |
| C | -0.816926 | 2.444858  | -2.648243 |
| C | -2.220429 | 4.517780  | -2.416454 |
| C | -0.986829 | 3.623680  | -0.446046 |
| H | 4.366661  | -0.139824 | -3.311497 |
| H | 2.957802  | -0.281316 | -4.342594 |
| H | 3.005504  | 2.073400  | -4.863003 |
| H | 2.644692  | 4.446401  | -4.132314 |
| H | 2.385403  | 4.895878  | -1.678009 |
| H | 2.722807  | 4.138843  | 0.552018  |
| H | 1.319351  | 3.081296  | 0.606008  |
| H | 4.940739  | -1.997726 | -4.288821 |
| H | 3.909088  | -3.432001 | -4.376089 |
| H | 5.549965  | -3.560289 | -3.748917 |
| H | 3.067004  | -4.551985 | -2.220523 |
| H | 3.479467  | -3.870557 | -0.629118 |
| H | 4.724587  | -4.651288 | -1.616680 |
| H | 5.676996  | -1.066487 | -1.946666 |
| H | 6.258416  | -2.704844 | -1.645896 |
| H | 5.170330  | -1.941779 | -0.483593 |
| H | 0.005415  | -0.377202 | -2.374881 |
| H | 0.660915  | -0.310925 | -4.023830 |

|   |           |           |           |
|---|-----------|-----------|-----------|
| H | -0.729535 | -1.341046 | -3.640809 |
| H | 1.907236  | -2.404682 | -4.978211 |
| H | 0.386821  | -3.241081 | -4.640797 |
| H | 1.902527  | -3.910448 | -4.033511 |
| H | -0.514375 | -3.409639 | -2.281524 |
| H | 1.039275  | -3.905110 | -1.577016 |
| H | 0.204797  | -2.464938 | -0.979458 |
| H | 5.324008  | 1.363168  | -0.566395 |
| H | 5.035823  | 3.110591  | -0.594807 |
| H | 6.584997  | 2.478667  | -0.021943 |
| H | 4.730613  | 4.403335  | 1.651973  |
| H | 6.360615  | 3.818093  | 2.006537  |
| H | 5.067121  | 3.565614  | 3.179495  |
| H | 6.872256  | 1.338149  | 2.063733  |
| H | 5.557234  | 1.022121  | 3.200139  |
| H | 5.622448  | 0.135000  | 1.683272  |
| H | 1.406751  | 4.098797  | 2.673577  |
| H | 3.015093  | 4.227369  | 3.405822  |
| H | 1.628060  | 3.740455  | 4.385696  |
| H | 4.092653  | 2.045929  | 4.419731  |
| H | 2.574066  | 1.541204  | 5.162348  |
| H | 3.389379  | 0.460792  | 4.017581  |
| H | 0.428834  | 1.610674  | 3.996179  |
| H | 1.109619  | 0.352501  | 2.933486  |
| H | 0.327449  | 1.775438  | 2.240726  |
| H | -0.813098 | -0.586206 | 2.897486  |
| H | -1.980017 | -0.929861 | 4.172851  |
| H | -2.186999 | 1.253356  | 5.085748  |
| H | -3.039083 | 3.603195  | 4.859904  |
| H | -3.805585 | 4.363009  | 2.593825  |
| H | -3.897661 | 4.014501  | 0.223023  |
| H | -4.954480 | 2.619122  | 0.338689  |
| H | -4.868201 | -3.271228 | 0.681495  |
| H | -6.086437 | -3.313161 | 1.968770  |
| H | -4.553558 | -4.157519 | 2.189329  |
| H | -4.015081 | -2.789958 | 4.395620  |

|   |           |           |           |
|---|-----------|-----------|-----------|
| H | -5.658997 | -2.180938 | 4.175910  |
| H | -4.322372 | -1.043791 | 4.379865  |
| H | -5.002313 | 0.170460  | 2.276088  |
| H | -6.350432 | -0.963266 | 2.126251  |
| H | -5.259708 | -0.729988 | 0.759840  |
| H | 0.103107  | -2.241175 | 1.189504  |
| H | 0.480149  | -3.812846 | 1.878524  |
| H | 0.207177  | -2.443571 | 2.938958  |
| H | -2.925468 | -4.616591 | 0.833650  |
| H | -1.234786 | -5.119614 | 0.940211  |
| H | -1.701480 | -3.751879 | -0.089277 |
| H | -1.724961 | -3.406840 | 4.253770  |
| H | -1.179092 | -4.889854 | 3.464744  |
| H | -2.893464 | -4.470534 | 3.442255  |
| H | -3.474414 | 2.361963  | -4.210813 |
| H | -5.047660 | 1.587348  | -4.426295 |
| H | -3.714459 | 0.671829  | -3.704617 |
| H | -5.348371 | 0.133171  | -1.768021 |
| H | -6.565742 | 1.145813  | -2.546892 |
| H | -6.126143 | 1.454111  | -0.868123 |
| H | -5.617008 | 3.928447  | -1.512301 |
| H | -6.238053 | 3.412282  | -3.078615 |
| H | -4.700080 | 4.259949  | -2.989906 |
| H | -0.313193 | 1.643072  | -2.108213 |
| H | -0.045796 | 3.117678  | -3.040349 |
| H | -1.341865 | 2.000582  | -3.498852 |
| H | -2.660643 | 4.321640  | -3.397534 |
| H | -1.345545 | 5.163026  | -2.575512 |
| H | -2.941125 | 5.085588  | -1.818148 |
| H | -1.563433 | 4.289082  | 0.204878  |
| H | -0.076334 | 4.157190  | -0.742182 |
| H | -0.699951 | 2.740211  | 0.130364  |

144

**C** in the quintet state SCF = -3548.82241780

Mo 2.498806 -0.145038 -0.049253

|    |           |           |           |
|----|-----------|-----------|-----------|
| Mo | -2.546010 | -0.005874 | -0.005573 |
| I  | 3.081907  | -1.891222 | 2.157356  |
| I  | -3.492411 | -1.984048 | -1.908925 |
| P  | 2.699162  | -1.791140 | -1.958033 |
| P  | 3.347142  | 1.866227  | 1.203970  |
| P  | -2.781373 | -1.467586 | 1.936928  |
| P  | -3.023779 | 2.046937  | -1.321400 |
| N  | 0.526503  | -0.022388 | 0.115938  |
| N  | -0.665888 | 0.021247  | 0.083406  |
| N  | 2.881259  | 1.273926  | -1.695917 |
| N  | -2.718955 | 1.468956  | 1.621402  |
| C  | 3.340524  | -0.598406 | -3.249863 |
| C  | 3.016585  | 0.853605  | -3.000220 |
| C  | 3.001997  | 1.748150  | -4.063778 |
| C  | 2.910951  | 3.121720  | -3.830303 |
| C  | 2.853919  | 3.553703  | -2.503731 |
| C  | 2.835666  | 2.630898  | -1.465481 |
| C  | 2.747279  | 3.116852  | -0.038624 |
| C  | 4.096552  | -3.105144 | -1.915043 |
| C  | 4.585490  | -3.551382 | -3.308984 |
| C  | 5.295312  | -2.478808 | -1.167434 |
| C  | 3.606208  | -4.330803 | -1.119265 |
| C  | 1.091695  | -2.504170 | -2.704850 |
| C  | 0.270726  | -1.291533 | -3.187151 |
| C  | 1.286230  | -3.470436 | -3.884619 |
| C  | 0.307215  | -3.201645 | -1.574929 |
| C  | 5.245582  | 2.131471  | 1.271869  |
| C  | 5.765839  | 2.112912  | -0.183414 |
| C  | 5.670093  | 3.463632  | 1.914973  |
| C  | 5.890059  | 0.944630  | 2.016222  |
| C  | 2.509760  | 2.448505  | 2.826024  |
| C  | 2.439210  | 3.982309  | 2.970584  |
| C  | 3.229687  | 1.838252  | 4.044490  |
| C  | 1.071681  | 1.890164  | 2.797860  |
| C  | -1.933372 | -0.301738 | 3.145461  |
| C  | -2.358697 | 1.116211  | 2.903559  |



|   |           |           |           |
|---|-----------|-----------|-----------|
| C | -2.379376 | 2.032539  | 3.952753  |
| C | -2.769852 | 3.350528  | 3.727040  |
| C | -3.179766 | 3.698461  | 2.441279  |
| C | -3.173452 | 2.748866  | 1.422651  |
| C | -3.742913 | 3.090336  | 0.075596  |
| C | -4.622424 | -1.541360 | 2.505184  |
| C | -5.280142 | -2.839246 | 1.996728  |
| C | -4.793268 | -1.411802 | 4.030480  |
| C | -5.376527 | -0.365469 | 1.837768  |
| C | -1.917502 | -3.133374 | 2.314446  |
| C | -0.401006 | -2.860818 | 2.268719  |
| C | -2.245595 | -4.137051 | 1.189441  |
| C | -2.256114 | -3.736176 | 3.689221  |
| C | -4.486096 | 2.157725  | -2.573155 |
| C | -4.016443 | 1.562082  | -3.914016 |
| C | -5.620890 | 1.268700  | -2.014030 |
| C | -5.077950 | 3.565712  | -2.796300 |
| C | -1.548199 | 3.108335  | -1.928644 |
| C | -0.641353 | 2.209338  | -2.790036 |
| C | -1.909533 | 4.380216  | -2.712496 |
| C | -0.756019 | 3.527656  | -0.674947 |
| H | 4.434079  | -0.682808 | -3.201971 |
| H | 3.048342  | -0.892401 | -4.262824 |
| H | 3.096008  | 1.362806  | -5.074361 |
| H | 2.905261  | 3.830573  | -4.652006 |
| H | 2.812590  | 4.612206  | -2.264965 |
| H | 3.232119  | 4.094725  | 0.057635  |
| H | 1.693926  | 3.256672  | 0.220676  |
| H | 4.973762  | -2.716700 | -3.903111 |
| H | 3.813721  | -4.054121 | -3.891817 |
| H | 5.412386  | -4.261899 | -3.178651 |
| H | 2.831654  | -4.885435 | -1.657405 |
| H | 3.218198  | -4.045731 | -0.136489 |
| H | 4.449361  | -5.015562 | -0.959299 |
| H | 5.679564  | -1.582760 | -1.670118 |
| H | 6.112874  | -3.211677 | -1.136686 |

|   |           |           |           |
|---|-----------|-----------|-----------|
| H | 5.039846  | -2.209755 | -0.140080 |
| H | 0.127925  | -0.569152 | -2.384431 |
| H | 0.733153  | -0.783446 | -4.041323 |
| H | -0.727381 | -1.626928 | -3.489146 |
| H | 1.880607  | -3.029776 | -4.693992 |
| H | 0.300766  | -3.718106 | -4.299708 |
| H | 1.756074  | -4.410086 | -3.580483 |
| H | -0.642657 | -3.574119 | -1.974105 |
| H | 0.852518  | -4.044563 | -1.141720 |
| H | 0.064830  | -2.499587 | -0.775448 |
| H | 5.460775  | 1.203276  | -0.711328 |
| H | 5.422164  | 2.976618  | -0.761920 |
| H | 6.862824  | 2.142456  | -0.164876 |
| H | 5.217262  | 4.327225  | 1.413603  |
| H | 6.759509  | 3.572720  | 1.828387  |
| H | 5.423642  | 3.513431  | 2.978467  |
| H | 6.982547  | 1.054559  | 1.987216  |
| H | 5.589098  | 0.885926  | 3.064312  |
| H | 5.624465  | -0.007156 | 1.546697  |
| H | 1.851364  | 4.444628  | 2.170527  |
| H | 3.422216  | 4.457694  | 2.991684  |
| H | 1.938570  | 4.224453  | 3.917308  |
| H | 4.227144  | 2.259648  | 4.196146  |
| H | 2.642421  | 2.056515  | 4.946240  |
| H | 3.316729  | 0.750931  | 3.957244  |
| H | 0.537688  | 2.232757  | 3.693410  |
| H | 1.072112  | 0.797613  | 2.787109  |
| H | 0.500528  | 2.228536  | 1.928674  |
| H | -0.875808 | -0.400327 | 2.882339  |
| H | -2.034117 | -0.565289 | 4.204006  |
| H | -2.077867 | 1.702835  | 4.942042  |
| H | -2.774642 | 4.078793  | 4.532320  |
| H | -3.526775 | 4.703321  | 2.220496  |
| H | -3.683412 | 4.167784  | -0.111490 |
| H | -4.809767 | 2.836387  | 0.092931  |
| H | -5.151137 | -2.956111 | 0.915083  |

|   |           |           |           |
|---|-----------|-----------|-----------|
| H | -6.358142 | -2.799432 | 2.203767  |
| H | -4.887778 | -3.729753 | 2.492401  |
| H | -4.282332 | -2.203941 | 4.582312  |
| H | -5.860914 | -1.469606 | 4.283514  |
| H | -4.423980 | -0.447002 | 4.395688  |
| H | -5.022921 | 0.609614  | 2.181259  |
| H | -6.444094 | -0.438036 | 2.087653  |
| H | -5.306106 | -0.402944 | 0.742170  |
| H | -0.099639 | -2.273625 | 1.399451  |
| H | 0.138846  | -3.813695 | 2.218799  |
| H | -0.036500 | -2.343852 | 3.160388  |
| H | -3.302702 | -4.404843 | 1.142724  |
| H | -1.676373 | -5.059970 | 1.365139  |
| H | -1.963814 | -3.741824 | 0.210977  |
| H | -2.052884 | -3.034121 | 4.506016  |
| H | -1.623743 | -4.618658 | 3.855166  |
| H | -3.296466 | -4.062995 | 3.765337  |
| H | -3.264286 | 2.192235  | -4.400311 |
| H | -4.870879 | 1.483527  | -4.599504 |
| H | -3.603044 | 0.557854  | -3.777306 |
| H | -5.303884 | 0.233445  | -1.878883 |
| H | -6.454599 | 1.267795  | -2.728786 |
| H | -6.018744 | 1.642331  | -1.062248 |
| H | -5.392409 | 4.039413  | -1.859723 |
| H | -5.973850 | 3.472965  | -3.424691 |
| H | -4.396755 | 4.244606  | -3.308436 |
| H | -0.234345 | 1.391700  | -2.194955 |
| H | 0.200992  | 2.796450  | -3.174270 |
| H | -1.168473 | 1.775780  | -3.644801 |
| H | -2.357158 | 4.153844  | -3.683747 |
| H | -0.990819 | 4.952097  | -2.903724 |
| H | -2.592563 | 5.033062  | -2.157893 |
| H | -1.303510 | 4.237537  | -0.046344 |
| H | 0.166619  | 4.022272  | -1.002210 |
| H | -0.488827 | 2.660132  | -0.065905 |

**TSC/PC** in the closed-shell singlet state SCF = -3548.79820293

|    |           |           |           |
|----|-----------|-----------|-----------|
| Mo | 2.470918  | -0.087423 | -0.065415 |
| Mo | -2.449423 | -0.085840 | 0.006945  |
| I  | 3.515264  | -1.917535 | 1.967204  |
| I  | -3.538565 | -1.944465 | -1.945925 |
| P  | 2.825471  | -1.496718 | -2.066859 |
| P  | 3.259073  | 1.910165  | 1.220264  |
| P  | -2.579539 | -1.702522 | 1.857754  |
| P  | -3.426607 | 1.987988  | -1.053034 |
| N  | 0.758585  | -0.088760 | 0.210788  |
| N  | -0.738564 | -0.024238 | -0.247599 |
| N  | 2.627885  | 1.467783  | -1.637417 |
| N  | -2.716532 | 1.233568  | 1.788126  |
| C  | 3.337803  | -0.187145 | -3.311427 |
| C  | 2.830683  | 1.182857  | -2.963790 |
| C  | 2.672550  | 2.142245  | -3.958053 |
| C  | 2.359073  | 3.458523  | -3.616795 |
| C  | 2.252500  | 3.774302  | -2.265950 |
| C  | 2.396298  | 2.779024  | -1.299401 |
| C  | 2.334737  | 3.148158  | 0.159974  |
| C  | 4.314964  | -2.700637 | -2.209135 |
| C  | 4.773570  | -3.001937 | -3.651544 |
| C  | 5.497555  | -2.036648 | -1.467244 |
| C  | 3.958252  | -4.016620 | -1.491183 |
| C  | 1.248536  | -2.244852 | -2.848563 |
| C  | 0.348114  | -1.049009 | -3.227321 |
| C  | 1.481985  | -3.097508 | -4.106248 |
| C  | 0.527965  | -3.085901 | -1.779136 |
| C  | 5.100249  | 2.413852  | 1.085154  |
| C  | 5.465045  | 2.496130  | -0.414710 |
| C  | 5.416400  | 3.772786  | 1.733032  |
| C  | 5.967444  | 1.303296  | 1.714469  |
| C  | 2.558000  | 2.278519  | 2.962882  |
| C  | 2.305842  | 3.777594  | 3.223595  |
| C  | 3.493675  | 1.702887  | 4.043892  |

|   |           |           |           |
|---|-----------|-----------|-----------|
| C | 1.212073  | 1.529952  | 3.053510  |
| C | -1.720574 | -0.596581 | 3.102325  |
| C | -2.229291 | 0.810429  | 3.002513  |
| C | -2.193571 | 1.647644  | 4.115915  |
| C | -2.665242 | 2.954243  | 4.024225  |
| C | -3.213262 | 3.367845  | 2.811985  |
| C | -3.256304 | 2.492301  | 1.729339  |
| C | -3.996227 | 2.896657  | 0.483828  |
| C | -4.364261 | -1.968879 | 2.541355  |
| C | -4.970697 | -3.247076 | 1.927092  |
| C | -4.410850 | -2.027864 | 4.079674  |
| C | -5.251495 | -0.788032 | 2.083835  |
| C | -1.571534 | -3.323636 | 2.003215  |
| C | -0.078751 | -2.938336 | 1.938939  |
| C | -1.893713 | -4.223236 | 0.792731  |
| C | -1.797897 | -4.100198 | 3.314482  |
| C | -5.025875 | 2.062424  | -2.112839 |
| C | -4.685458 | 1.612053  | -3.545939 |
| C | -6.009785 | 1.044197  | -1.491551 |
| C | -5.730946 | 3.434227  | -2.141743 |
| C | -2.064381 | 3.125033  | -1.769043 |
| C | -1.288258 | 2.352509  | -2.854661 |
| C | -2.582209 | 4.450405  | -2.352378 |
| C | -1.093457 | 3.451216  | -0.614896 |
| H | 4.433192  | -0.141187 | -3.260396 |
| H | 3.083705  | -0.452451 | -4.342400 |
| H | 2.815129  | 1.854929  | -4.994827 |
| H | 2.231741  | 4.218884  | -4.381291 |
| H | 2.058101  | 4.793685  | -1.946967 |
| H | 2.640257  | 4.191738  | 0.300074  |
| H | 1.303627  | 3.064904  | 0.518617  |
| H | 5.037343  | -2.094838 | -4.206416 |
| H | 4.030428  | -3.550181 | -4.230817 |
| H | 5.677034  | -3.624810 | -3.608959 |
| H | 3.188587  | -4.577789 | -2.030216 |
| H | 3.613450  | -3.836751 | -0.468480 |

|   |           |           |           |
|---|-----------|-----------|-----------|
| H | 4.851782  | -4.652889 | -1.436095 |
| H | 5.789702  | -1.078860 | -1.916620 |
| H | 6.371699  | -2.699188 | -1.523100 |
| H | 5.272922  | -1.868985 | -0.412030 |
| H | 0.219415  | -0.367480 | -2.387205 |
| H | 0.742217  | -0.491336 | -4.084766 |
| H | -0.649596 | -1.418249 | -3.491425 |
| H | 2.037462  | -2.557852 | -4.882032 |
| H | 0.505391  | -3.364662 | -4.530549 |
| H | 2.007977  | -4.030883 | -3.886524 |
| H | -0.418138 | -3.456353 | -2.191241 |
| H | 1.122377  | -3.944642 | -1.452136 |
| H | 0.291343  | -2.480357 | -0.905302 |
| H | 5.253816  | 1.558420  | -0.938697 |
| H | 4.936837  | 3.302990  | -0.931837 |
| H | 6.541076  | 2.694064  | -0.501951 |
| H | 4.797621  | 4.578587  | 1.321288  |
| H | 6.465317  | 4.031979  | 1.536389  |
| H | 5.283943  | 3.755420  | 2.817482  |
| H | 7.026727  | 1.542537  | 1.550120  |
| H | 5.813150  | 1.201943  | 2.790000  |
| H | 5.759442  | 0.327949  | 1.264534  |
| H | 1.551822  | 4.191318  | 2.545736  |
| H | 3.209972  | 4.384980  | 3.141270  |
| H | 1.921225  | 3.898319  | 4.244958  |
| H | 4.425574  | 2.269061  | 4.133281  |
| H | 2.985727  | 1.758323  | 5.015959  |
| H | 3.732732  | 0.652258  | 3.850097  |
| H | 0.744279  | 1.760438  | 4.019470  |
| H | 1.358915  | 0.449907  | 2.981204  |
| H | 0.508439  | 1.819147  | 2.266843  |
| H | -0.676942 | -0.610819 | 2.772625  |
| H | -1.743216 | -0.947574 | 4.139654  |
| H | -1.783355 | 1.266485  | 5.045341  |
| H | -2.627596 | 3.623872  | 4.878091  |
| H | -3.632270 | 4.363211  | 2.701483  |

|   |           |           |           |
|---|-----------|-----------|-----------|
| H | -3.990248 | 3.985146  | 0.364819  |
| H | -5.045345 | 2.605844  | 0.620006  |
| H | -4.917548 | -3.228718 | 0.832962  |
| H | -6.029774 | -3.310129 | 2.210834  |
| H | -4.485009 | -4.157921 | 2.283617  |
| H | -3.796499 | -2.829146 | 4.493589  |
| H | -5.445569 | -2.203832 | 4.403563  |
| H | -4.086693 | -1.081328 | 4.527098  |
| H | -4.920321 | 0.169092  | 2.495232  |
| H | -6.277957 | -0.963205 | 2.434024  |
| H | -5.284798 | -0.707524 | 0.991859  |
| H | 0.146930  | -2.207304 | 1.162510  |
| H | 0.517565  | -3.833125 | 1.727127  |
| H | 0.291031  | -2.536523 | 2.886984  |
| H | -2.935495 | -4.548516 | 0.764890  |
| H | -1.264420 | -5.121639 | 0.847097  |
| H | -1.685000 | -3.716280 | -0.150283 |
| H | -1.605644 | -3.481067 | 4.198061  |
| H | -1.089761 | -4.938553 | 3.347930  |
| H | -2.803215 | -4.521313 | 3.397426  |
| H | -4.081280 | 2.357018  | -4.073741 |
| H | -5.614933 | 1.481396  | -4.115699 |
| H | -4.153874 | 0.655234  | -3.549941 |
| H | -5.603311 | 0.031449  | -1.491808 |
| H | -6.932113 | 1.034936  | -2.087068 |
| H | -6.293644 | 1.307939  | -0.465222 |
| H | -5.980673 | 3.797073  | -1.138750 |
| H | -6.677832 | 3.327603  | -2.687532 |
| H | -5.153164 | 4.206763  | -2.649684 |
| H | -0.861136 | 1.433932  | -2.450658 |
| H | -0.464263 | 2.976249  | -3.223116 |
| H | -1.918238 | 2.087606  | -3.708332 |
| H | -3.161919 | 4.302087  | -3.267099 |
| H | -1.721374 | 5.080292  | -2.613592 |
| H | -3.194734 | 5.013308  | -1.639528 |
| H | -1.559193 | 4.062392  | 0.166037  |

|   |           |          |           |
|---|-----------|----------|-----------|
| H | -0.251437 | 4.022242 | -1.022434 |
| H | -0.698591 | 2.538925 | -0.161136 |

144

**TSC/PC** in the triplet state SCF = -3548.77320571

|    |           |           |           |
|----|-----------|-----------|-----------|
| Mo | 2.435532  | -0.076829 | -0.088344 |
| Mo | -2.458834 | -0.082916 | 0.009899  |
| I  | 3.450214  | -2.095112 | 1.785452  |
| I  | -3.643586 | -1.661240 | -2.072008 |
| P  | 2.756044  | -1.317196 | -2.228688 |
| P  | 3.276632  | 1.788306  | 1.351822  |
| P  | -2.494822 | -1.963940 | 1.675938  |
| P  | -3.423582 | 2.173337  | -0.783771 |
| N  | 0.731612  | -0.052280 | 0.191155  |
| N  | -0.799493 | 0.086082  | -0.462854 |
| N  | 2.614584  | 1.596586  | -1.509432 |
| N  | -2.548976 | 1.000023  | 1.891476  |
| C  | 3.337837  | 0.094390  | -3.317775 |
| C  | 2.826468  | 1.430759  | -2.861162 |
| C  | 2.678209  | 2.470622  | -3.768160 |
| C  | 2.372178  | 3.759565  | -3.320196 |
| C  | 2.273628  | 3.957713  | -1.943277 |
| C  | 2.404753  | 2.885829  | -1.064861 |
| C  | 2.361884  | 3.129121  | 0.421195  |
| C  | 4.200636  | -2.558507 | -2.455967 |
| C  | 4.670800  | -2.760560 | -3.911431 |
| C  | 5.400842  | -2.004606 | -1.653145 |
| C  | 3.778035  | -3.908143 | -1.844594 |
| C  | 1.170757  | -1.914355 | -3.121747 |
| C  | 0.335529  | -0.653138 | -3.434525 |
| C  | 1.416043  | -2.670060 | -4.438153 |
| C  | 0.364763  | -2.802801 | -2.157923 |
| C  | 5.130288  | 2.253143  | 1.217651  |
| C  | 5.475478  | 2.453599  | -0.275571 |
| C  | 5.489024  | 3.546263  | 1.970397  |
| C  | 5.984495  | 1.078306  | 1.739019  |



|   |           |           |           |
|---|-----------|-----------|-----------|
| C | 2.634263  | 2.024125  | 3.137707  |
| C | 2.421616  | 3.501576  | 3.526159  |
| C | 3.581148  | 1.341320  | 4.143948  |
| C | 1.275058  | 1.299729  | 3.202825  |
| C | -1.524294 | -0.986179 | 2.929566  |
| C | -2.043542 | 0.415176  | 3.052158  |
| C | -1.962505 | 1.094079  | 4.253890  |
| C | -2.361987 | 2.434176  | 4.352781  |
| C | -2.913296 | 3.016389  | 3.203377  |
| C | -3.029511 | 2.298254  | 2.025319  |
| C | -3.840864 | 2.870164  | 0.891752  |
| C | -4.249931 | -2.246748 | 2.414386  |
| C | -4.935191 | -3.432531 | 1.706128  |
| C | -4.203978 | -2.470668 | 3.938777  |
| C | -5.117696 | -0.996064 | 2.141960  |
| C | -1.536875 | -3.610841 | 1.562037  |
| C | -0.039363 | -3.256066 | 1.459320  |
| C | -1.956543 | -4.355585 | 0.278808  |
| C | -1.718948 | -4.523718 | 2.789340  |
| C | -5.093428 | 2.352570  | -1.697287 |
| C | -4.883130 | 2.078889  | -3.199352 |
| C | -6.042055 | 1.277782  | -1.117862 |
| C | -5.773053 | 3.726451  | -1.508690 |
| C | -2.087715 | 3.344875  | -1.480656 |
| C | -1.423394 | 2.684555  | -2.705809 |
| C | -2.614288 | 4.739265  | -1.862217 |
| C | -1.025544 | 3.510287  | -0.373832 |
| H | 4.430768  | 0.114362  | -3.214650 |
| H | 3.125999  | -0.069976 | -4.378731 |
| H | 2.827263  | 2.270792  | -4.824779 |
| H | 2.253033  | 4.582996  | -4.017133 |
| H | 2.097141  | 4.949147  | -1.536515 |
| H | 2.689699  | 4.150082  | 0.649420  |
| H | 1.334526  | 3.030400  | 0.787831  |
| H | 4.954410  | -1.818090 | -4.393037 |
| H | 3.927720  | -3.253121 | -4.538594 |

|   |           |           |           |
|---|-----------|-----------|-----------|
| H | 5.564461  | -3.398803 | -3.905473 |
| H | 2.992301  | -4.392818 | -2.433056 |
| H | 3.425851  | -3.786402 | -0.815612 |
| H | 4.641461  | -4.586503 | -1.825754 |
| H | 5.753136  | -1.039488 | -2.038705 |
| H | 6.239056  | -2.709161 | -1.737080 |
| H | 5.170158  | -1.893136 | -0.591961 |
| H | 0.225116  | -0.018397 | -2.555541 |
| H | 0.763880  | -0.065239 | -4.253668 |
| H | -0.674624 | -0.962166 | -3.730292 |
| H | 2.039693  | -2.102847 | -5.138189 |
| H | 0.446629  | -2.837286 | -4.925596 |
| H | 1.872643  | -3.650680 | -4.278091 |
| H | -0.537610 | -3.159849 | -2.668950 |
| H | 0.929536  | -3.672989 | -1.810168 |
| H | 0.040183  | -2.227450 | -1.292352 |
| H | 5.239751  | 1.567409  | -0.872846 |
| H | 4.954187  | 3.308305  | -0.716620 |
| H | 6.553750  | 2.639658  | -0.362391 |
| H | 4.880754  | 4.396284  | 1.640854  |
| H | 6.539585  | 3.798574  | 1.773838  |
| H | 5.376822  | 3.440727  | 3.052011  |
| H | 7.045346  | 1.309513  | 1.573045  |
| H | 5.848118  | 0.894012  | 2.805749  |
| H | 5.749743  | 0.145951  | 1.217421  |
| H | 1.655926  | 3.981810  | 2.908064  |
| H | 3.334950  | 4.097372  | 3.465770  |
| H | 2.068397  | 3.544289  | 4.564796  |
| H | 4.527833  | 1.877495  | 4.259227  |
| H | 3.094732  | 1.326149  | 5.128298  |
| H | 3.791116  | 0.305592  | 3.858410  |
| H | 0.837937  | 1.460307  | 4.195714  |
| H | 1.396242  | 0.226436  | 3.038551  |
| H | 0.556250  | 1.667923  | 2.464596  |
| H | -0.516324 | -0.945943 | 2.494983  |
| H | -1.447252 | -1.471185 | 3.907276  |

|   |           |           |           |
|---|-----------|-----------|-----------|
| H | -1.550443 | 0.573430  | 5.113249  |
| H | -2.276707 | 2.985150  | 5.282794  |
| H | -3.301022 | 4.031233  | 3.231114  |
| H | -3.807030 | 3.964513  | 0.897335  |
| H | -4.889495 | 2.590340  | 1.059744  |
| H | -4.950284 | -3.294366 | 0.619367  |
| H | -5.975889 | -3.496863 | 2.050177  |
| H | -4.460499 | -4.390344 | 1.928587  |
| H | -3.607087 | -3.338316 | 4.226900  |
| H | -5.225278 | -2.637682 | 4.306600  |
| H | -3.808604 | -1.591025 | 4.458390  |
| H | -4.717836 | -0.097124 | 2.616122  |
| H | -6.122138 | -1.174209 | 2.549825  |
| H | -5.229709 | -0.806583 | 1.068666  |
| H | 0.170563  | -2.452282 | 0.753370  |
| H | 0.516450  | -4.140492 | 1.126829  |
| H | 0.386139  | -2.962693 | 2.422166  |
| H | -3.005600 | -4.659385 | 0.283532  |
| H | -1.346277 | -5.263375 | 0.186197  |
| H | -1.793249 | -3.742962 | -0.609107 |
| H | -1.451407 | -4.014880 | 3.721938  |
| H | -1.043096 | -5.382143 | 2.683670  |
| H | -2.733744 | -4.917862 | 2.885463  |
| H | -4.309382 | 2.876502  | -3.681928 |
| H | -5.860901 | 2.032831  | -3.696067 |
| H | -4.375581 | 1.125273  | -3.372243 |
| H | -5.654676 | 0.267248  | -1.258653 |
| H | -7.006106 | 1.341920  | -1.638869 |
| H | -6.242290 | 1.428827  | -0.050602 |
| H | -5.945436 | 3.967016  | -0.454293 |
| H | -6.756331 | 3.695209  | -1.995719 |
| H | -5.215056 | 4.547268  | -1.960109 |
| H | -1.017662 | 1.703739  | -2.452826 |
| H | -0.591518 | 3.313902  | -3.046418 |
| H | -2.119114 | 2.564301  | -3.541598 |
| H | -3.274814 | 4.708688  | -2.732763 |

|   |           |          |           |
|---|-----------|----------|-----------|
| H | -1.759877 | 5.376442 | -2.125362 |
| H | -3.145160 | 5.228684 | -1.037867 |
| H | -1.416131 | 4.023964 | 0.510782  |
| H | -0.203078 | 4.111684 | -0.775870 |
| H | -0.615294 | 2.545418 | -0.068228 |

144

**PC (2×B)** in the closed-shell singlet state SCF = -3548.86565467

|    |           |           |           |
|----|-----------|-----------|-----------|
| Mo | -4.381830 | -0.186003 | -0.688845 |
| Mo | 3.787389  | 0.099853  | -0.000210 |
| I  | -6.213216 | -2.445627 | -0.507326 |
| I  | 2.343627  | 0.300525  | 2.499555  |
| P  | -2.233980 | -1.455728 | -0.861871 |
| P  | -5.884583 | 1.384741  | 0.498844  |
| P  | 4.805444  | -2.099739 | 0.535565  |
| P  | 3.950750  | 2.544677  | -0.573151 |
| N  | -4.620025 | 0.433340  | -2.207977 |
| N  | 2.705899  | -0.490467 | -1.111632 |
| N  | -2.921513 | 1.339938  | 0.066115  |
| N  | 5.725879  | 0.169810  | -1.177236 |
| C  | -1.114064 | -0.348194 | 0.167774  |
| C  | -1.596027 | 1.074836  | 0.253905  |
| C  | -0.687010 | 2.081381  | 0.578800  |
| C  | -1.134807 | 3.389751  | 0.730373  |
| C  | -2.489529 | 3.657862  | 0.561742  |
| C  | -3.367502 | 2.621820  | 0.242125  |
| C  | -4.844221 | 2.908952  | 0.122178  |
| C  | -1.947717 | -3.136233 | 0.005658  |
| C  | -0.475233 | -3.449181 | 0.327789  |
| C  | -2.726294 | -3.067755 | 1.340816  |
| C  | -2.552465 | -4.257926 | -0.859060 |
| C  | -1.471056 | -1.405606 | -2.615304 |
| C  | -1.265687 | 0.080516  | -2.982258 |
| C  | -0.115880 | -2.125867 | -2.726659 |
| C  | -2.481012 | -2.024874 | -3.604031 |
| C  | -5.916820 | 1.267977  | 2.410904  |

|   |           |           |           |
|---|-----------|-----------|-----------|
| C | -4.461409 | 1.310713  | 2.930126  |
| C | -6.698171 | 2.405020  | 3.092665  |
| C | -6.511754 | -0.098869 | 2.814283  |
| C | -7.599403 | 1.870761  | -0.195351 |
| C | -7.983819 | 3.341354  | 0.067621  |
| C | -8.674825 | 0.926728  | 0.378101  |
| C | -7.541557 | 1.645195  | -1.722399 |
| C | 5.645330  | -2.290912 | -1.138483 |
| C | 6.302477  | -1.011302 | -1.562765 |
| C | 7.464678  | -1.041811 | -2.334270 |
| C | 8.061818  | 0.149254  | -2.733544 |
| C | 7.485469  | 1.348941  | -2.327987 |
| C | 6.332788  | 1.334925  | -1.542049 |
| C | 5.772171  | 2.634191  | -1.034148 |
| C | 6.234816  | -2.011848 | 1.809017  |
| C | 5.710707  | -2.408565 | 3.204167  |
| C | 7.450189  | -2.874997 | 1.421927  |
| C | 6.695663  | -0.536442 | 1.897186  |
| C | 3.829195  | -3.737002 | 0.678770  |
| C | 3.011424  | -3.905183 | -0.621738 |
| C | 2.834320  | -3.618645 | 1.851644  |
| C | 4.724388  | -4.977072 | 0.855754  |
| C | 3.875720  | 3.985979  | 0.694987  |
| C | 2.400009  | 4.244530  | 1.046341  |
| C | 4.598439  | 3.485173  | 1.967289  |
| C | 4.553321  | 5.300147  | 0.254486  |
| C | 3.051792  | 2.970128  | -2.212911 |
| C | 1.555817  | 2.637979  | -2.057488 |
| C | 3.211424  | 4.436855  | -2.646327 |
| C | 3.640709  | 2.063902  | -3.318301 |
| H | -1.127530 | -0.757860 | 1.184345  |
| H | -0.065690 | -0.381776 | -0.146538 |
| H | 0.352458  | 1.816138  | 0.727943  |
| H | -0.441792 | 4.183236  | 0.992439  |
| H | -2.879302 | 4.662738  | 0.689871  |
| H | -5.104395 | 3.798698  | 0.707577  |

|   |           |           |           |
|---|-----------|-----------|-----------|
| H | -5.086023 | 3.123227  | -0.926054 |
| H | -0.006027 | -2.676483 | 0.944113  |
| H | 0.133233  | -3.579558 | -0.565851 |
| H | -0.428215 | -4.387996 | 0.896912  |
| H | -1.973639 | -4.422083 | -1.773495 |
| H | -3.590741 | -4.042088 | -1.130208 |
| H | -2.542119 | -5.197605 | -0.290655 |
| H | -2.356488 | -2.272711 | 2.000859  |
| H | -2.593691 | -4.015771 | 1.878786  |
| H | -3.797887 | -2.924055 | 1.181361  |
| H | -2.199945 | 0.644921  | -2.922987 |
| H | -0.516065 | 0.558979  | -2.345019 |
| H | -0.897709 | 0.137452  | -4.015440 |
| H | 0.628563  | -1.734832 | -2.026138 |
| H | 0.281101  | -1.967137 | -3.738845 |
| H | -0.210550 | -3.206388 | -2.585424 |
| H | -2.082739 | -1.930203 | -4.623590 |
| H | -2.650040 | -3.088009 | -3.411099 |
| H | -3.445729 | -1.512778 | -3.559984 |
| H | -3.841166 | 0.519728  | 2.497382  |
| H | -3.972244 | 2.269758  | 2.736321  |
| H | -4.473647 | 1.160043  | 4.017176  |
| H | -6.324672 | 3.394312  | 2.803795  |
| H | -6.587375 | 2.317242  | 4.181784  |
| H | -7.767240 | 2.362643  | 2.870874  |
| H | -6.446318 | -0.207745 | 3.905538  |
| H | -7.560688 | -0.205009 | 2.532668  |
| H | -5.969769 | -0.929699 | 2.352379  |
| H | -7.284126 | 4.037791  | -0.406970 |
| H | -8.044321 | 3.588662  | 1.129546  |
| H | -8.973007 | 3.530768  | -0.369660 |
| H | -8.874172 | 1.113312  | 1.437618  |
| H | -9.615332 | 1.093548  | -0.163191 |
| H | -8.395441 | -0.124281 | 0.247728  |
| H | -8.506637 | 1.944876  | -2.152911 |
| H | -7.356419 | 0.597124  | -1.967607 |

|   |           |           |           |
|---|-----------|-----------|-----------|
| H | -6.757868 | 2.235018  | -2.207969 |
| H | 4.808715  | -2.486316 | -1.817156 |
| H | 6.342011  | -3.132047 | -1.214130 |
| H | 7.885984  | -1.999988 | -2.619494 |
| H | 8.961819  | 0.143052  | -3.341273 |
| H | 7.925027  | 2.300985  | -2.606985 |
| H | 5.987715  | 3.443669  | -1.739191 |
| H | 6.298262  | 2.885878  | -0.105836 |
| H | 4.823190  | -1.828685 | 3.480294  |
| H | 6.491589  | -2.202958 | 3.947770  |
| H | 5.469378  | -3.471992 | 3.272170  |
| H | 7.202074  | -3.933454 | 1.314468  |
| H | 8.214850  | -2.793183 | 2.205414  |
| H | 7.905632  | -2.531352 | 0.486311  |
| H | 7.110267  | -0.170159 | 0.954028  |
| H | 7.484352  | -0.456522 | 2.656882  |
| H | 5.877933  | 0.125218  | 2.208639  |
| H | 2.461803  | -2.997104 | -0.882843 |
| H | 2.284105  | -4.711413 | -0.471829 |
| H | 3.638131  | -4.194143 | -1.472380 |
| H | 3.328062  | -3.548534 | 2.822478  |
| H | 2.196909  | -4.511775 | 1.866639  |
| H | 2.193423  | -2.741495 | 1.741954  |
| H | 5.455286  | -5.078384 | 0.045155  |
| H | 4.093534  | -5.875239 | 0.839695  |
| H | 5.262620  | -4.975697 | 1.807150  |
| H | 1.841995  | 4.644193  | 0.193730  |
| H | 2.341125  | 4.983828  | 1.855881  |
| H | 1.913706  | 3.329209  | 1.396543  |
| H | 4.152008  | 2.569586  | 2.360731  |
| H | 4.517695  | 4.255411  | 2.745188  |
| H | 5.669326  | 3.312515  | 1.803229  |
| H | 5.602456  | 5.156133  | -0.025326 |
| H | 4.542070  | 5.999095  | 1.101126  |
| H | 4.044119  | 5.790841  | -0.575286 |
| H | 1.414670  | 1.594842  | -1.768115 |

|   |          |          |           |
|---|----------|----------|-----------|
| H | 1.047508 | 2.795653 | -3.017462 |
| H | 1.060632 | 3.270697 | -1.317139 |
| H | 2.681887 | 5.122185 | -1.979409 |
| H | 2.777919 | 4.558994 | -3.647148 |
| H | 4.260325 | 4.748527 | -2.704361 |
| H | 4.689127 | 2.298608 | -3.534077 |
| H | 3.073671 | 2.232164 | -4.242720 |
| H | 3.558661 | 1.004571 | -3.062419 |

144

**PC (2×B) in the triplet state** SCF = -3548.83044817

|    |           |           |           |
|----|-----------|-----------|-----------|
| Mo | -4.354090 | -0.181517 | -0.734317 |
| Mo | 3.778082  | 0.099815  | -0.007525 |
| I  | -6.139938 | -2.397796 | -0.510753 |
| I  | 2.242026  | 0.225465  | 2.440057  |
| P  | -2.123790 | -1.436746 | -0.881565 |
| P  | -5.935075 | 1.379378  | 0.537553  |
| P  | 4.818710  | -2.089583 | 0.520625  |
| P  | 3.932177  | 2.561459  | -0.517194 |
| N  | -4.592021 | 0.334472  | -2.294424 |
| N  | 2.739488  | -0.479294 | -1.166398 |
| N  | -3.011216 | 1.302650  | 0.093255  |
| N  | 5.753049  | 0.220900  | -1.111383 |
| C  | -1.097163 | -0.294160 | 0.160180  |
| C  | -1.617171 | 1.117158  | 0.180855  |
| C  | -0.739860 | 2.152248  | 0.408267  |
| C  | -1.193237 | 3.475550  | 0.575985  |
| C  | -2.586751 | 3.673523  | 0.510722  |
| C  | -3.449297 | 2.628664  | 0.269412  |
| C  | -4.933542 | 2.897454  | 0.178808  |
| C  | -1.897880 | -3.111611 | 0.000447  |
| C  | -0.421962 | -3.394601 | 0.343004  |
| C  | -2.688919 | -3.047100 | 1.328079  |
| C  | -2.468575 | -4.248029 | -0.867235 |
| C  | -1.383501 | -1.408219 | -2.638428 |
| C  | -1.206975 | 0.079463  | -3.018896 |



|   |           |           |           |
|---|-----------|-----------|-----------|
| C | -0.014910 | -2.105080 | -2.736271 |
| C | -2.380605 | -2.060133 | -3.618482 |
| C | -5.975789 | 1.192134  | 2.438450  |
| C | -4.527272 | 1.307426  | 2.966158  |
| C | -6.825217 | 2.279299  | 3.122670  |
| C | -6.505797 | -0.207846 | 2.813018  |
| C | -7.656139 | 1.767669  | -0.188855 |
| C | -8.091735 | 3.224005  | 0.078847  |
| C | -8.709784 | 0.791149  | 0.368923  |
| C | -7.566038 | 1.555575  | -1.716431 |
| C | 5.707846  | -2.240957 | -1.131878 |
| C | 6.361882  | -0.943772 | -1.505671 |
| C | 7.551205  | -0.941070 | -2.232868 |
| C | 8.150036  | 0.266851  | -2.580684 |
| C | 7.542639  | 1.449046  | -2.164638 |
| C | 6.362630  | 1.402428  | -1.423797 |
| C | 5.769612  | 2.680391  | -0.900004 |
| C | 6.211638  | -2.000602 | 1.834695  |
| C | 5.660019  | -2.436197 | 3.207258  |
| C | 7.451871  | -2.833954 | 1.461618  |
| C | 6.642834  | -0.519412 | 1.967310  |
| C | 3.868844  | -3.747124 | 0.614699  |
| C | 3.076930  | -3.897730 | -0.704205 |
| C | 2.852952  | -3.670625 | 1.772676  |
| C | 4.779092  | -4.977524 | 0.781032  |
| C | 3.789519  | 3.972590  | 0.779932  |
| C | 2.298993  | 4.210794  | 1.074290  |
| C | 4.465309  | 3.456225  | 2.071563  |
| C | 4.470930  | 5.301267  | 0.391465  |
| C | 3.098634  | 3.015714  | -2.184716 |
| C | 1.600887  | 2.666164  | -2.106873 |
| C | 3.259231  | 4.494038  | -2.578005 |
| C | 3.748469  | 2.142619  | -3.282870 |
| H | -1.147801 | -0.701908 | 1.178329  |
| H | -0.040698 | -0.323129 | -0.123792 |
| H | 0.312026  | 1.906562  | 0.500430  |

|   |           |           |           |
|---|-----------|-----------|-----------|
| H | -0.512647 | 4.292154  | 0.782084  |
| H | -3.008330 | 4.666259  | 0.650482  |
| H | -5.214205 | 3.747713  | 0.809755  |
| H | -5.205887 | 3.155669  | -0.853558 |
| H | 0.020175  | -2.610275 | 0.963650  |
| H | 0.202828  | -3.515154 | -0.540781 |
| H | -0.368050 | -4.330880 | 0.914375  |
| H | -1.868279 | -4.411978 | -1.767090 |
| H | -3.503765 | -4.053472 | -1.164125 |
| H | -2.455593 | -5.181073 | -0.288968 |
| H | -2.336892 | -2.244294 | 1.985755  |
| H | -2.543631 | -3.992351 | 1.867174  |
| H | -3.761312 | -2.922087 | 1.164225  |
| H | -2.151552 | 0.628493  | -2.982411 |
| H | -0.483806 | 0.585121  | -2.374220 |
| H | -0.826985 | 0.128718  | -4.047857 |
| H | 0.721178  | -1.687570 | -2.042768 |
| H | 0.378553  | -1.953179 | -3.750401 |
| H | -0.089642 | -3.185379 | -2.579853 |
| H | -1.988781 | -1.955205 | -4.638883 |
| H | -2.516761 | -3.127991 | -3.425603 |
| H | -3.359896 | -1.575336 | -3.579142 |
| H | -3.863295 | 0.563551  | 2.517560  |
| H | -4.089951 | 2.292314  | 2.782027  |
| H | -4.541892 | 1.139964  | 4.050661  |
| H | -6.496041 | 3.289716  | 2.855286  |
| H | -6.720305 | 2.178965  | 4.210772  |
| H | -7.888922 | 2.187495  | 2.888842  |
| H | -6.467860 | -0.318724 | 3.904862  |
| H | -7.537625 | -0.374063 | 2.497607  |
| H | -5.897152 | -1.001153 | 2.369931  |
| H | -7.411164 | 3.946391  | -0.383313 |
| H | -8.170863 | 3.459770  | 1.141972  |
| H | -9.082408 | 3.381087  | -0.367087 |
| H | -8.918689 | 0.962720  | 1.428659  |
| H | -9.650214 | 0.940424  | -0.176939 |

|   |           |           |           |
|---|-----------|-----------|-----------|
| H | -8.406717 | -0.251723 | 0.232784  |
| H | -8.529492 | 1.836047  | -2.162174 |
| H | -7.357251 | 0.513672  | -1.969471 |
| H | -6.789113 | 2.168630  | -2.183634 |
| H | 4.893719  | -2.432443 | -1.838350 |
| H | 6.417819  | -3.071524 | -1.203369 |
| H | 7.994723  | -1.887320 | -2.524822 |
| H | 9.071972  | 0.286612  | -3.153978 |
| H | 7.980983  | 2.413420  | -2.400409 |
| H | 6.005122  | 3.513637  | -1.570216 |
| H | 6.253662  | 2.908699  | 0.057047  |
| H | 4.754141  | -1.879536 | 3.471530  |
| H | 6.417118  | -2.230566 | 3.975158  |
| H | 5.439168  | -3.505578 | 3.247782  |
| H | 7.224329  | -3.893703 | 1.324152  |
| H | 8.194213  | -2.757109 | 2.266892  |
| H | 7.924910  | -2.461652 | 0.546101  |
| H | 7.080934  | -0.126231 | 1.046102  |
| H | 7.404958  | -0.442240 | 2.754040  |
| H | 5.803755  | 0.121470  | 2.265127  |
| H | 2.525898  | -2.988370 | -0.958098 |
| H | 2.355411  | -4.715016 | -0.586387 |
| H | 3.723577  | -4.161216 | -1.548174 |
| H | 3.329915  | -3.630407 | 2.753384  |
| H | 2.219847  | -4.567035 | 1.749277  |
| H | 2.210824  | -2.792214 | 1.682561  |
| H | 5.525514  | -5.050485 | -0.018217 |
| H | 4.162792  | -5.885037 | 0.735367  |
| H | 5.300870  | -4.987674 | 1.741609  |
| H | 1.770363  | 4.614675  | 0.205834  |
| H | 2.199061  | 4.939318  | 1.889573  |
| H | 1.804471  | 3.288925  | 1.392611  |
| H | 4.005849  | 2.535894  | 2.437527  |
| H | 4.352285  | 4.217224  | 2.854654  |
| H | 5.542321  | 3.287492  | 1.947409  |
| H | 5.532772  | 5.174010  | 0.153939  |

|   |          |          |           |
|---|----------|----------|-----------|
| H | 4.415008 | 5.985160 | 1.248641  |
| H | 3.991053 | 5.800430 | -0.450532 |
| H | 1.456045 | 1.620000 | -1.830989 |
| H | 1.142519 | 2.824035 | -3.091995 |
| H | 1.056964 | 3.287742 | -1.392130 |
| H | 2.693270 | 5.156873 | -1.918441 |
| H | 2.865325 | 4.633524 | -3.592966 |
| H | 4.305692 | 4.819355 | -2.585522 |
| H | 4.802534 | 2.393999 | -3.446566 |
| H | 3.220644 | 2.325582 | -4.227647 |
| H | 3.669286 | 1.076857 | -3.054393 |
